# Supplementary material for: The role of common and rare genetic variation on adiposity across childhood
Source: medRxiv preprint, doi:10.1101/2025.05.13.25327505, version 1 (2025-05-13)
Supplement: Supplementary Tables [file 327505_file02.xlsx]

## Sheet: Index
Sup. Data number	Sheet title	Table title	Legend
1	MoBa descript	Sample descriptives of the MoBa cohort	Descriptive summary statistics of the MoBa and ALSPAC cohorts. Column headers are: Age/variable, N; number of participants with available relevant data, Female (%); percentage of female participants, and Median (Q1-Q3) for males and females seperately; median values with interquartile range in parentheses.
2	All MoBa signals	All signals for child BMI across all MoBa timepoints	Collated independent signals identified in each of the MoBa cross-sectional GWAS of childhood BMI, aged 6 weeks to 8 years. Column headers are: timepoint; child age when GWAS was performed, SNP; variant identifier as rsID, CHR; chromosome, BP; chromosomal position on GRCh37, effect_allele; effect allele (ALLELE1), other_allele; other allele (ALLELE0), A1FREQ; effect allele frequency, BETA; effect…
3	Ind. MoBa signals	Independent signals for child BMI across all MoBa timepoints	Signals from Supplementary Data 2 were aggregated into 152 independent (R2<0.05) signals, retaining the most strongly associated SNP at each timepoint per locus. Each signal was looked up in the published EGG GWAS (child BMI age 2-10) and annotated with signals identified in EGG GWAS and the Helgeland et al. paper, if at all in LD (r2>0.05) with any of them. Column headers are: minP timepoint; GW…
4	MoBa h2 & rg	Heritability at and genetic correlations between child BMI at all MoBa timepoints	Genetic correlation estimates as obtained from LDSC of the GWAS of BMI in MoBa at different time points with the GWAS of BMI in MoBa at other time points as well with the GWAS of SAC10 in the UKBB and the GWAS of adult BMI (Yengo 2018). SNP-based heritability estimates obtained from these analyses for these phenotypes.
5	ALSPAC PGS_Lead	Replication in ALSPAC of PGS of MoBa lead SNPs	PGSs were constructed using the 152 SNPs associated with BMI in MoBa weighted by their effect size in each MoBa.GWAS. Anthropometric measurements in ALSPAC were regressed on these PGSs. Column headers are: GWAS; the MoBa-GWAS the 152 SNPs are weighted by, ALSPAC_variable; the dependent variable from ALSPAC where cif = Children in Focus and clinic = Measurements from health visitor records, R2; pr…
6	ALSPAC PGS_GW	Replication in ALSPAC of genome-wide PGS from MoBa	Genome-wide PGSs were constructed with LDpred2 using summary statistics from all MoBa GWASs, as well as adult BMI (Yengo, 2018). Anthropometric measurements in ALSPAC were regressed on these PGSs. Column headers are: GWAS; the GWAS summary statistics used in LDpred2, ALSPAC_variable; the dependent variable from ALSPAC where cif = Children in Focus and clinic = Measurements from health visitor rec…
7	ALSPAC gSEM PGS	Replication in ALSPAC of PGS of gSEM child adiposity signals	PGSs were constructed using the SNPs discovered in the gSEM common factor GWAS, GWAS on SAC10 and a GWAS on adult BMI (Yengo, 2018) weighted by their unadjusted effect estimate. Anthropometric measurements in ALSPAC were regressed on these PGSs. Column headers are: GWAS; which GWAS used to construct the PGS, ALSPAC_variable; the dependent variable from ALSPAC where cif = Children in Focus and cli…
8	gSEM signals	GWAS signals for the gSEM child adiposity common factor	Independent signals from the gSEM common factor GWAS and their look-up in the three components of the model, AAM (age at menarche), SAC10 (comparative body size age 10), MOBA8 (childhood BMI age 8) as well us the published EGG GWAS (childhood BMI age 2-10) and adult BMI GWAS. Column headers are: SNP; variant identifier as rsID, CHR; chromosome, BP; chromosomal position on GRCh37, effect_allele; e…
9	MOBA + gSEM signals	624 Independent child adiposity signals: combined from MoBa child BMI (all timepoints) and gSEM child adiposity signals	The combination of the 152 signals for cross-sectional BMI in MoBa (Supplementary Data 3) with the 526 signals for the childhood adiposity common factor GWAS (Supplementary Data 4) led to the identification of 624 independent (R2<0.05) infant or childhood adiposity signals. All signals were annotated with signals identified in the EGG childhood BMI GWAS paper, if at all in LD (r2>0.05) with any o…
10	MOBA + gSEM traj.	624 Independent child adiposity signals: Trajectory allocation and individual associations at each timepoint	Results and base data for trajectory analysis. Effect estimates from 13 GWASs throughout childhood were used in hierarchical clustering to identify 4 effect trajectories. Column headers are: SNP; variant identifier, CHR; chromosome, BP; chromosomal position on GRCh37, effect_allele, other_allele, Trajectory; trajectory number, Trajectory_name; trajectory name, timepoint_most_significant; GWAS whe…
11	ALSPAC Traj_PGS	Replication in ALSPAC of PGS derived from each child BMI trajectory	A PGS was constructed for each of the four trajectories, comprising the variants present in the given trajectory weighted by the effect estimate in the GWAS were the variant showed the strongest association. Column headers are: PGS; the trajectory whose variants are used to construct the PGS, ALSPAC_variable; the dependent variable from ALSPAC where cif = Children in Focus and clinic = Measuremen…
12	MR	Mendelian Randomisation for child BMI trajectories to adult anthropometric and metabolic traits	Results of inverse variance weighted Mendelian Randomisation analysis using the SNPs in the four trajectories to anthropometic and metabolic outcomes. In each case the SNPs are weighed by the effects in a representative MoBa timepoint, except for birthweight which is weighted by two to represent the "U"-shaped effect. Analyses are then further adjusted by the effects of the SNPs on BMI in adults …
13	PoE MoBa	Parent-of-origin effects (PoE) in MoBa	Results from the parent-of-origin (PoE) analysis performed in up to 25,779 unrelated child-mother-father trios in the MoBa cohort. PoE was estimated by contrasting maternal-transmitted (mt) and paternal-transmitted (pt) alleles, using linear regression models adjusted for sex, birth cohort, and population structure (top 10 PCs). SNPs located within 100kb of known imprinted genes were separately a…
14	PoE UKB	Replication in UK Biobank of parent-of-origin effects (PoE)	Results from the PoE analysis applied to up to 123,716 unrelated individuals in the UK Biobank, replicating findings from MoBa. The method follows Hofmeister et al. (2024) to infer parent-of-origin effects without direct parental genotyping, using large-scale population data to extend PoE analyses to SAC10 and adult BMI. Column headers are: rsid; rsID, CHR; chromosome, BP; base pair position (GRC…
15	G2G genes	624 Independent child adiposity signals: putative causal genes from G2G	The ‘GWAS to Genes’ (G2G) analysis framework was used to implicate putatively causal genes at each of the 624 childhood adiposity signals from Supplementary Data 9. Information is shown for the highest ranked gene at each locus. Column headers are: analysis; GWAS where each signal was originally identified in, signal; variant identifier as rsID, HC_gene_mapping; a flag denoting whether the highes…
16	Genes + Traj.	G2G genes categorised by their early life BMI trajectories	Combination of information from Supplementary Data 9, 10, and 15,
17	Pathways by Traj.	Biological pathway enrichment for Trajectory-specific genes	The high-confidence genes from Supplementary Data 16 were separated into the different growth trajectories and entered into pathway enrichment tests using gProfiler. Column headers are: Source: pathway source [GO:BP/GO:CC/GO:MF]; term_name: pathway name; term_id: pathway unique identifier; term_size: total number of genes in this pathway; and then for each of the four trajectories and across all …
18	Clust. pathways	Clustering of enriched biological pathways	Pathways are cluster based on shared sets of intersection genes (as reported in Supplementary Data 17, and as described in the Methods). Core genes (all) refer to the set of genes that intersect with all the pathways in the pwathway group. Core genes (N-1) refers to the list of genes that intersect with all but one of the pathways in the pathway group. These analysis are based on the full set of …
19	Child-adult effects	624 Independent child adiposity signals: Systematic comparison of child vs adult effects	Systematic comparison of the effects child adiposity signals (from Supplementary Data 9) on body size in childhood vs. adult BMI (data from GIANT, Yengo et al.). Column headers are: analysis; GWAS where each signal was originally identified in, SNP; variant identifier as rsID, P; p-value for the association in the child adiposity discovery GWAS, discovery BETA scaled pos; effect estimate per copy…
20	Hypomap cells	Hypothalamic cell populations enriched for expressed genes containing adiposity associated variants	Hypothalamic cell populations enriched for expressed genes containing variants associated with the childhood adiposity common factor and/or adult BMI GWAS signals, using single-nucleus RNA sequencing data from HypoMap, Tadross et al.
21	Hypomap genes	Genes specifically expressed in the 19 cell populations identified as enriched using the Childhood adiposity gSEM	Genes specifically expressed in the 19 cell populations that are enriched based on the gSEM child adiposity common factor (and not adult BMI) (see Supplementary Table 20). Also shown is the intersection of these genes that show high specificity of expression (based on being one of the top 100 most specifically expressed genes) and the genes identified from the G2G pipeline (Supplementary Table 15…
22	SAC10 WGS	Gene burden tests for adiposity at age 10 (SAC10) in UK Biobank whole genome sequence (WGS) data	We tested genes with at least 100 carriers of rare (frequency <0.1%) variants that were either high confidence protein truncating variants (HC PTV) or damaging variants, defined as either HC PTVs or missense variants with a REVEL score >=0.7, in BOLT-LMM. Genes passing the exome-wide significance threshold of P<2.9×10-6 were looked up in the equivalent analysis for adult BMI. Column headers are: …
23	WES Look-ups	WGS gene associations with selected obesity-related traits phenotypes	For each identified WGS gene, we performed look-ups for predefined relevant obesity-related phenotypes using whole-exome sequencing data in UK Biobank. Column headers are as in Supplementary Data 22. P-values < the multiple testing corrected threshold p<3.47E-04 are highlighted in bold

## Sheet: 1 MoBa descript
							Sample descriptives of the ALSPAC cohort
Age	N	Female (%)	Median BMI females (Q1 - Q3)	Median BMI males (Q1 - Q3)			Variable	N	%Female	Median females (Q1-Q3)	Median males (Q1-Q3)
6w	43832	0.487	15.3 (14.41 - 16.2)	15.87 (14.89 - 16.81)			bmi_birth	6512	0.486	13.29 (12.43 - 14.11)	13.36 (12.48 - 14.19)
3m	61544	0.489	16.19 (15.28 - 17.17)	16.78 (15.85 - 17.81)			bmi_cif_4m	714	0.482	16.59 (15.74 - 17.38)	17.12 (15.97 - 18.01)
6m	62276	0.491	16.9 (15.97 - 17.92)	17.31 (16.38 - 18.34)			bmi_cif_8m	940	0.472	17.66 (16.76 - 18.6)	18.04 (17.01 - 19.14)
8m	54480	0.49	17.04 (16.12 - 18.03)	17.44 (16.53 - 18.44)			bmi_cif_12m	902	0.476	17.66 (16.69 - 18.53)	17.94 (17.05 - 18.85)
1y	54396	0.49	16.7 (15.83 - 17.63)	17.12 (16.27 - 18.05)			bmi_cif_18m	854	0.479	16.86 (16.01 - 17.72)	17.24 (16.38 - 18.14)
16m	41024	0.49	16.47 (15.63 - 17.39)	16.88 (16.05 - 17.78)			bmi_cif_25m	787	0.475	16.51 (15.75 - 17.46)	16.89 (16.07 - 17.77)
2y	40783	0.49	16.3 (15.43 - 17.25)	16.54 (15.7 - 17.46)			bmi_cif_37m	806	0.478	16.38 (15.52 - 17.24)	16.53 (15.76 - 17.25)
3y	41450	0.489	15.95 (15.03 - 16.96)	16.17 (15.3 - 17.11)			bmi_cif_49m	853	0.472	16.29 (15.48 - 17.15)	16.45 (15.72 - 17.25)
5y	33449	0.49	15.43 (14.53 - 16.52)	15.5 (14.65 - 16.5)			bmi_cif_61m	779	0.476	15.88 (15.01 - 16.87)	15.82 (15.16 - 16.66)
7y	34604	0.487	15.56 (14.58 - 16.83)	15.61 (14.67 - 16.73)			bmi_7y	6463	0.492	15.92 (14.92 - 17.32)	15.7 (14.87 - 16.81)
8y	26418	0.492	15.98 (14.82 - 17.43)	15.98 (14.92 - 17.22)			bmi_8y	5435	0.499	16.75 (15.54 - 18.5)	16.47 (15.51 - 17.83)
							bmi_9y	6208	0.503	17.3 (15.77 - 19.4)	16.77 (15.6 - 18.71)
							bmi_10y	6004	0.504	17.69 (16.07 - 19.93)	17.26 (15.93 - 19.46)
							bmi_11y	5795	0.509	18.59 (16.75 - 21.13)	17.93 (16.43 - 20.47)
							bmi_12y	5463	0.51	19.32 (17.52 - 21.78)	18.74 (17.04 - 21.09)
							bmi_13y	5062	0.51	20.07 (18.26 - 22.47)	19.22 (17.65 - 21.39)
							bmi_15y	4455	0.525	21.09 (19.34 - 23.36)	20.29 (18.79 - 22.42)
							bmi_17y	3989	0.559	21.99 (20.15 - 24.64)	21.69 (19.96 - 24.27)
							fat_perc_9y	5971	0.505	25.98 (20.17 - 32.47)	17.92 (13.45 - 25.52)
							fat_perc_11y	5717	0.509	27.01 (21.33 - 34.64)	20.96 (15.44 - 29.18)
							fat_perc_13y	4991	0.512	28.75 (23.01 - 34.9)	16.5 (11.6 - 25.24)
							fat_perc_15y	4276	0.524	30.37 (25.33 - 35.91)	13.97 (9.97 - 20.74)
							fat_perc_17y	3834	0.557	32.18 (27.3 - 38.05)	15.69 (10.83 - 23.16)

## Sheet: 2 All MoBa signals
Timepoint	SNP	CHR	BP	effect_allele	other_allele	A1FREQ	BETA	SE	P
moba_bmi_b_6w	rs1171279	1	65988493	C	T	0.767496	-0.0489301	0.00789807	5.82143e-10
moba_bmi_b_6w	rs1194338	11	65261438	C	A	0.7547	-0.0509029	0.00778123	6.07995e-11
moba_bmi_b_6w	rs17145750	7	73026378	C	T	0.840137	0.0508415	0.00912443	2.51808e-08
moba_bmi_b_6w	rs5418	17	7185092	G	A	0.449608	-0.039403	0.00670494	4.18504e-09
moba_bmi_b_6w	rs74580656	2	25451789	C	T	0.786472	-0.0470879	0.00816492	8.06436e-09
moba_bmi_b_6w	rs75233715	1	221288313	T	A	0.900657	0.0616166	0.0112201	3.98281e-08
moba_bmi_b_6w	rs8035886	15	84459360	T	C	0.565311	0.0524489	0.00672209	6.07016e-15
moba_bmi_c_3m	rs10160596	11	65351364	G	A	0.733042	-0.0487736	0.00623339	5.09448e-15
moba_bmi_c_3m	rs1032296	4	145434688	T	C	0.375031	0.0364493	0.00568499	1.44095e-10
moba_bmi_c_3m	rs11022015	11	11766945	T	C	0.593094	-0.033127	0.00560698	3.459e-09
moba_bmi_c_3m	rs11044907	12	20012531	C	G	0.730111	-0.0343127	0.00623973	3.81804e-08
moba_bmi_c_3m	rs11190095	10	101201376	A	G	0.986171	0.137922	0.0233703	3.5999e-09
moba_bmi_c_3m	rs1160705	5	25128668	C	T	0.574572	0.0309887	0.00554051	2.23039e-08
moba_bmi_c_3m	rs117473235	11	26535881	T	C	0.983451	-0.118413	0.0215502	3.91318e-08
moba_bmi_c_3m	rs11889534	2	218393975	T	C	0.563163	0.0320186	0.00556803	8.90102e-09
moba_bmi_c_3m	rs11973042	7	13529463	G	A	0.847895	0.0447562	0.00774595	7.5591e-09
moba_bmi_c_3m	rs12230843	12	20105947	T	G	0.486315	0.0431993	0.00549717	3.88866e-15
moba_bmi_c_3m	rs12343333	9	109620811	T	C	0.68361	0.0349443	0.00589792	3.12594e-09
moba_bmi_c_3m	rs12454103	18	35271023	C	A	0.827381	0.0409387	0.0072558	1.67884e-08
moba_bmi_c_3m	rs13234269	7	130429186	T	A	0.494658	0.0398686	0.0054976	4.10677e-13
moba_bmi_c_3m	rs17145750	7	73026378	C	T	0.84135	0.0650411	0.00751648	5.01072e-18
moba_bmi_c_3m	rs17584168	4	149741498	T	G	0.799814	-0.0514543	0.00684371	5.54115e-14
moba_bmi_c_3m	rs1984664	17	2171197	A	C	0.62257	-0.0336581	0.00565087	2.58066e-09
moba_bmi_c_3m	rs1998200	20	57309234	A	G	0.572303	0.0333973	0.00555112	1.78443e-09
moba_bmi_c_3m	rs209404	6	83544572	T	G	0.263299	0.0405788	0.00625412	8.67961e-11
moba_bmi_c_3m	rs228816	6	39108006	G	C	0.384039	-0.0579497	0.00564223	9.54993e-25
moba_bmi_c_3m	rs2509903	2	158514510	T	C	0.1099	0.0768919	0.00885202	3.74197e-18
moba_bmi_c_3m	rs2767486	1	65991203	A	G	0.838349	-0.100297	0.00745898	3.22849e-41
moba_bmi_c_3m	rs2815764	1	72754123	A	G	0.184612	-0.0430252	0.00708455	1.25456e-09
moba_bmi_c_3m	rs2816988	1	200071345	T	G	0.550889	-0.0434244	0.00553456	4.29339e-15
moba_bmi_c_3m	rs28360623	6	39003992	C	T	0.754329	-0.0618151	0.00638654	3.7051e-22
moba_bmi_c_3m	rs28648976	12	124807433	A	G	0.873772	0.0490925	0.00826386	2.83942e-09
moba_bmi_c_3m	rs4594227	15	84497207	A	G	0.551184	0.0550356	0.00550051	1.44079e-23
moba_bmi_c_3m	rs4721112	7	1889466	T	C	0.39079	-0.0320096	0.00560814	1.14517e-08
moba_bmi_c_3m	rs4869278	5	95616462	A	C	0.303794	0.0437973	0.00596807	2.15824e-13
moba_bmi_c_3m	rs4968214	17	7477477	A	G	0.281314	-0.0379412	0.00608929	4.64045e-10
moba_bmi_c_3m	rs4975311	4	143500223	A	G	0.266251	-0.0457876	0.00620784	1.6338e-13
moba_bmi_c_3m	rs58631773	2	176195103	T	G	0.90774	0.055551	0.00951887	5.35069e-09
moba_bmi_c_3m	rs62175552	2	160937220	T	G	0.539564	0.0325208	0.00552079	3.84769e-09
moba_bmi_c_3m	rs670318	1	63727542	T	C	0.051838	0.0847825	0.012522	1.28145e-11
moba_bmi_c_3m	rs6735077	2	179381323	T	G	0.784844	0.0368977	0.00667735	3.27997e-08
moba_bmi_c_3m	rs6749422	2	25150011	C	G	0.51091	-0.0581948	0.0054777	2.30622e-26
moba_bmi_c_3m	rs6751837	2	148387381	C	T	0.707775	0.0345262	0.00603216	1.04237e-08
moba_bmi_c_3m	rs72874467	11	27981992	C	T	0.859574	-0.0437653	0.00799903	4.46673e-08
moba_bmi_c_3m	rs74676797	2	633063	G	A	0.17521	-0.0491782	0.00728965	1.5167e-11
moba_bmi_c_3m	rs75614054	9	98275789	C	T	0.882223	-0.0555418	0.00853366	7.58752e-11
moba_bmi_c_3m	rs75790195	2	158148167	T	C	0.975525	0.104801	0.0177255	3.37031e-09
moba_bmi_c_3m	rs77804065	17	43810896	C	T	0.818139	0.0402127	0.00711988	1.62372e-08
moba_bmi_c_3m	rs7967455	12	20293797	G	A	0.875498	-0.0463959	0.00828872	2.175e-08
moba_bmi_c_3m	rs9394485	6	38254520	G	A	0.984459	0.133294	0.0222111	1.95817e-09
moba_bmi_d_6m	rs10061190	5	128376600	T	C	0.882685	0.0463687	0.00835813	2.89394e-08
moba_bmi_d_6m	rs10156602	9	96345328	A	G	0.606047	-0.0341202	0.00552885	6.77345e-10
moba_bmi_d_6m	rs10160596	11	65351364	G	A	0.733007	-0.044715	0.00611781	2.69153e-13
moba_bmi_d_6m	rs10491140	17	43950976	G	T	0.823562	0.0519438	0.00704711	1.69434e-13
moba_bmi_d_6m	rs10494808	1	200089872	C	T	0.551941	-0.0493987	0.00543649	1.02282e-19
moba_bmi_d_6m	rs10499088	6	119027955	T	C	0.753137	-0.0365992	0.00628094	5.64209e-09
moba_bmi_d_6m	rs10519513	5	116840907	G	A	0.804243	-0.0449068	0.00680713	4.19469e-11
moba_bmi_d_6m	rs10743344	12	20108945	G	A	0.488409	0.0373544	0.00539873	4.54465e-12
moba_bmi_d_6m	rs10817580	9	117039222	A	G	0.731109	0.034342	0.00609051	1.71431e-08
moba_bmi_d_6m	rs10841453	12	20295896	C	A	0.876097	-0.0454302	0.00815646	2.54959e-08
moba_bmi_d_6m	rs10868561	9	89956566	G	A	0.630238	0.0334025	0.00556741	1.97738e-09
moba_bmi_d_6m	rs10872573	6	100810622	T	C	0.263582	-0.0344066	0.00622968	3.33227e-08
moba_bmi_d_6m	rs10877032	12	58270791	A	G	0.613418	-0.032681	0.00554713	3.82675e-09
moba_bmi_d_6m	rs10954754	7	84131879	G	A	0.859884	-0.0444708	0.00777519	1.0679e-08
moba_bmi_d_6m	rs11190095	10	101201376	A	G	0.986182	0.129973	0.0229519	1.48878e-08
moba_bmi_d_6m	rs1160705	5	25128668	C	T	0.5743	0.0298326	0.00544158	4.1973e-08
moba_bmi_d_6m	rs116600817	17	7458795	A	G	0.738287	0.0377708	0.00610952	6.31801e-10
moba_bmi_d_6m	rs118170811	10	102366896	G	A	0.937542	-0.0680263	0.0110631	7.79992e-10
moba_bmi_d_6m	rs11889534	2	218393975	T	C	0.563452	0.034872	0.00547694	1.92681e-10
moba_bmi_d_6m	rs11900786	2	158508271	T	C	0.108816	0.0907301	0.00870088	1.85353e-25
moba_bmi_d_6m	rs12154627	7	130422934	T	C	0.493761	0.0409486	0.0054103	3.77138e-14
moba_bmi_d_6m	rs12198480	6	84342600	C	T	0.688697	0.033591	0.00585867	9.8349e-09
moba_bmi_d_6m	rs12343333	9	109620811	T	C	0.683763	0.0336045	0.00579046	6.49756e-09
moba_bmi_d_6m	rs12587505	14	27983502	A	G	0.645121	0.0369879	0.00561396	4.4412e-11
moba_bmi_d_6m	rs13158163	5	95626870	C	T	0.696727	-0.0541836	0.00586479	2.49287e-20
moba_bmi_d_6m	rs134666	22	29495254	G	A	0.298081	0.0323551	0.00589813	4.11936e-08
moba_bmi_d_6m	rs145775785	12	65902265	C	T	0.98239	-0.128048	0.0204771	4.02041e-10
moba_bmi_d_6m	rs1473222	4	143488095	G	A	0.276601	-0.0334379	0.00602381	2.84119e-08
moba_bmi_d_6m	rs150390634	16	66723392	G	A	0.989224	-0.157055	0.0260687	1.69477e-09
moba_bmi_d_6m	rs1514177	1	74991402	C	G	0.420126	0.0341514	0.00546035	3.98933e-10
moba_bmi_d_6m	rs1670262	15	99597353	A	G	0.286274	0.0410806	0.00597	5.93608e-12
moba_bmi_d_6m	rs17127776	1	66077805	A	G	0.839679	-0.0760915	0.0073764	5.99515e-25
moba_bmi_d_6m	rs17287315	5	141827033	G	A	0.904326	0.0522287	0.00917831	1.26701e-08
moba_bmi_d_6m	rs17777059	16	81528953	A	G	0.766138	-0.0388335	0.00634578	9.38275e-10
moba_bmi_d_6m	rs179269	6	39102619	A	G	0.373372	-0.0652703	0.00557467	1.15478e-31
moba_bmi_d_6m	rs1998200	20	57309234	A	G	0.572638	0.0305616	0.00545003	2.0514e-08
moba_bmi_d_6m	rs2012704	2	28184766	T	A	0.526608	0.0324625	0.0054256	2.18796e-09
moba_bmi_d_6m	rs2033237	5	50596784	T	C	0.711059	-0.0341998	0.00594297	8.6818e-09
moba_bmi_d_6m	rs209421	6	83523684	G	T	0.262646	0.0551998	0.0061407	2.49115e-19
moba_bmi_d_6m	rs2272368	12	124811855	A	G	0.857228	0.0501464	0.00771368	7.97995e-11
moba_bmi_d_6m	rs2378662	9	86707289	G	A	0.453444	-0.0383058	0.00543423	1.80219e-12
moba_bmi_d_6m	rs2442729	6	31319226	C	T	0.848264	-0.050874	0.00755433	1.64589e-11
moba_bmi_d_6m	rs2731602	12	19955649	A	G	0.346095	0.0317095	0.00567591	2.31446e-08
moba_bmi_d_6m	rs2767486	1	65991203	A	G	0.838491	-0.119799	0.00733969	6.87227e-60
moba_bmi_d_6m	rs2777939	20	62243810	C	T	0.11796	-0.045698	0.0083292	4.10025e-08
moba_bmi_d_6m	rs2787351	9	117127034	C	G	0.226298	-0.0381265	0.00646827	3.76071e-09
moba_bmi_d_6m	rs28360623	6	39003992	C	T	0.753931	-0.0651178	0.00628114	3.49623e-25
moba_bmi_d_6m	rs28544066	4	149778462	C	T	0.817708	-0.0546928	0.00693623	3.1434e-15
moba_bmi_d_6m	rs2933157	11	29229471	A	G	0.370291	-0.03359	0.00556908	1.62431e-09
moba_bmi_d_6m	rs3017095	11	62178624	G	A	0.66646	0.0394615	0.00572969	5.68984e-12
moba_bmi_d_6m	rs31196	5	158300798	C	A	0.427957	-0.0306673	0.00544573	1.78715e-08
moba_bmi_d_6m	rs34133162	16	89780672	G	A	0.817498	-0.0392285	0.00697541	1.8678e-08
moba_bmi_d_6m	rs34136796	3	50337032	C	A	0.604096	-0.0312349	0.00552586	1.58128e-08
moba_bmi_d_6m	rs35493868	7	73039406	C	G	0.797643	0.0655458	0.00672079	1.79639e-22
moba_bmi_d_6m	rs35628463	2	653581	G	A	0.833704	0.0545197	0.0072562	5.75572e-14
moba_bmi_d_6m	rs3786915	19	33987424	T	G	0.678516	-0.0326354	0.00577813	1.62233e-08
moba_bmi_d_6m	rs3796031	2	218712918	C	T	0.607014	-0.0313129	0.00554767	1.65814e-08
moba_bmi_d_6m	rs4396355	12	133058288	T	G	0.896042	-0.0498141	0.00885298	1.83565e-08
moba_bmi_d_6m	rs444654	11	27705905	T	G	0.208404	-0.0381748	0.00659876	7.24486e-09
moba_bmi_d_6m	rs4594227	15	84497207	A	G	0.551125	0.0523569	0.0054007	3.18346e-22
moba_bmi_d_6m	rs467022	5	55805639	C	T	0.278505	0.0327753	0.00600812	4.89294e-08
moba_bmi_d_6m	rs4711532	6	38265136	A	T	0.987618	0.145378	0.024414	2.60513e-09
moba_bmi_d_6m	rs4721112	7	1889466	T	C	0.390707	-0.0302795	0.00550831	3.86189e-08
moba_bmi_d_6m	rs4835637	4	145439027	A	G	0.411084	0.042239	0.00547073	1.15505e-14
moba_bmi_d_6m	rs4869143	5	95880553	A	G	0.375519	0.03199	0.00553805	7.6315e-09
moba_bmi_d_6m	rs4969072	17	71135799	G	A	0.622209	0.0306449	0.00554462	3.25852e-08
moba_bmi_d_6m	rs57250041	2	191508220	T	A	0.888039	0.0469099	0.00858364	4.62818e-08
moba_bmi_d_6m	rs58879558	17	44095467	T	C	0.811815	0.0553317	0.00688009	8.81658e-16
moba_bmi_d_6m	rs59137532	2	160891552	A	C	0.972255	0.0998345	0.0164002	1.14773e-09
moba_bmi_d_6m	rs6058077	20	33140999	G	A	0.163472	-0.0422803	0.00728128	6.37133e-09
moba_bmi_d_6m	rs6058949	20	31486559	T	C	0.558548	-0.0333718	0.00543764	8.40001e-10
moba_bmi_d_6m	rs61023343	5	63966957	A	C	0.358758	-0.0363555	0.00564066	1.15409e-10
moba_bmi_d_6m	rs62175552	2	160937220	T	G	0.539549	0.034307	0.00542446	2.54056e-10
moba_bmi_d_6m	rs62425398	6	166416028	C	A	0.893194	-0.0508314	0.00878681	7.2527e-09
moba_bmi_d_6m	rs6493361	15	49615952	G	C	0.331974	0.0429119	0.00571415	5.92379e-14
moba_bmi_d_6m	rs6693754	1	163139984	C	T	0.418393	0.0300457	0.00548166	4.22591e-08
moba_bmi_d_6m	rs670318	1	63727542	T	C	0.0519503	0.0961346	0.0123129	5.82774e-15
moba_bmi_d_6m	rs6749422	2	25150011	C	G	0.510773	-0.0666579	0.00538481	3.40095e-35
moba_bmi_d_6m	rs6751837	2	148387381	C	T	0.707666	0.0403627	0.00592912	9.92887e-12
moba_bmi_d_6m	rs6804842	3	25106437	A	G	0.4281	-0.0299797	0.00543088	3.38563e-08
moba_bmi_d_6m	rs7020491	9	128144477	C	T	0.560121	0.0309709	0.00541298	1.05521e-08
moba_bmi_d_6m	rs7107575	11	122845406	T	C	0.406201	-0.0316746	0.00549484	8.19351e-09
moba_bmi_d_6m	rs7287939	22	41396353	T	C	0.909894	0.0529453	0.00940529	1.8093e-08
moba_bmi_d_6m	rs7305424	12	118399491	A	T	0.621896	-0.030497	0.00556954	4.35833e-08
moba_bmi_d_6m	rs7307053	12	124494540	C	T	0.68693	-0.0377204	0.00578616	7.07457e-11
moba_bmi_d_6m	rs7407453	18	23313349	A	T	0.618948	-0.0330977	0.00553896	2.29483e-09
moba_bmi_d_6m	rs74082072	1	65970925	T	C	0.904405	-0.0506919	0.00918978	3.46577e-08
moba_bmi_d_6m	rs7531118	1	72837239	T	C	0.470205	-0.0380579	0.00541522	2.09604e-12
moba_bmi_d_6m	rs75614054	9	98275789	C	T	0.88199	-0.06139	0.00837263	2.2636e-13
moba_bmi_d_6m	rs75876534	14	60075360	C	G	0.901062	0.0531471	0.00899419	3.44088e-09
moba_bmi_d_6m	rs78434457	16	67061184	G	C	0.779373	-0.0442021	0.0065778	1.81844e-11
moba_bmi_d_6m	rs7927865	11	12853841	G	A	0.289183	0.0472043	0.0059514	2.16272e-15
moba_bmi_d_6m	rs809345	6	154303184	G	T	0.264176	-0.0399362	0.00612828	7.18621e-11
moba_bmi_d_6m	rs8117463	20	17231063	G	A	0.659144	0.0319459	0.00570011	2.08934e-08
moba_bmi_d_6m	rs862346	6	152016369	A	T	0.567606	0.0317386	0.00544244	5.48719e-09
moba_bmi_d_6m	rs9357851	6	55097163	T	C	0.768601	0.042428	0.00639127	3.1703e-11
moba_bmi_d_6m	rs942861	1	65798843	G	A	0.367043	0.0354477	0.00562137	2.86563e-10
moba_bmi_d_6m	rs957875	2	179384417	T	C	0.785419	0.0393432	0.0065643	2.05362e-09
moba_bmi_d_6m	rs9893527	17	2164210	A	C	0.622079	-0.0358873	0.00554356	9.56313e-11
moba_bmi_d_6m	rs9894621	17	12000584	A	G	0.445575	0.0373668	0.00541305	5.08862e-12
moba_bmi_e_8m	rs10156602	9	96345328	A	G	0.60688	-0.0381436	0.00587464	8.41783e-11
moba_bmi_e_8m	rs10160596	11	65351364	G	A	0.731802	-0.0374072	0.0064967	8.51746e-09
moba_bmi_e_8m	rs10240765	7	13059992	G	A	0.754883	0.0384177	0.00663325	6.96851e-09
moba_bmi_e_8m	rs10491140	17	43950976	G	T	0.82281	0.0456062	0.00747499	1.05298e-09
moba_bmi_e_8m	rs11030616	11	29236130	A	T	0.763007	-0.0387664	0.00674455	9.04087e-09
moba_bmi_e_8m	rs11101962	1	110014187	A	T	0.310807	0.0340463	0.0062127	4.2505e-08
moba_bmi_e_8m	rs116600817	17	7458795	A	G	0.738375	0.048322	0.00649416	1.00046e-13
moba_bmi_e_8m	rs11676272	2	25141538	A	G	0.513243	-0.0692076	0.00572642	1.25748e-33
moba_bmi_e_8m	rs11900786	2	158508271	T	C	0.108471	0.0849036	0.00926719	5.10623e-20
moba_bmi_e_8m	rs11964854	6	39018493	A	C	0.732318	-0.0667359	0.00654064	1.91734e-24
moba_bmi_e_8m	rs12154627	7	130422934	T	C	0.493062	0.0368838	0.00577099	1.64536e-10
moba_bmi_e_8m	rs1293936	6	152017691	T	G	0.553208	0.0337027	0.00577552	5.36476e-09
moba_bmi_e_8m	rs13158163	5	95626870	C	T	0.696515	-0.0641759	0.00623259	7.28115e-25
moba_bmi_e_8m	rs13339044	16	77687685	C	A	0.981693	0.117967	0.0213709	3.3907e-08
moba_bmi_e_8m	rs134666	22	29495254	G	A	0.298511	0.0369927	0.0062732	3.70305e-09
moba_bmi_e_8m	rs1423530	5	64067078	C	A	0.679013	0.0452881	0.00620439	2.89135e-13
moba_bmi_e_8m	rs145775785	12	65902265	C	T	0.982601	-0.129444	0.0219144	3.48787e-09
moba_bmi_e_8m	rs1514177	1	74991402	C	G	0.419896	0.0421813	0.00580811	3.80014e-13
moba_bmi_e_8m	rs1670262	15	99597353	A	G	0.286292	0.0447357	0.0063522	1.88756e-12
moba_bmi_e_8m	rs17341381	5	116838191	G	A	0.803836	-0.0441747	0.00721615	9.26105e-10
moba_bmi_e_8m	rs174534	11	61549458	A	G	0.647886	-0.0346683	0.00600256	7.66885e-09
moba_bmi_e_8m	rs179269	6	39102619	A	G	0.37488	-0.0650073	0.00591658	4.39845e-28
moba_bmi_e_8m	rs1923782	9	89959135	C	T	0.630021	0.0326779	0.00592412	3.46649e-08
moba_bmi_e_8m	rs2012704	2	28184766	T	A	0.526742	0.0336758	0.00576943	5.31716e-09
moba_bmi_e_8m	rs2051821	17	46143515	T	C	0.792339	0.0402242	0.00703255	1.06701e-08
moba_bmi_e_8m	rs209421	6	83523684	G	T	0.262432	0.0491217	0.00652535	5.15941e-14
moba_bmi_e_8m	rs216197	17	2201944	A	G	0.376596	0.0325464	0.0059088	3.62669e-08
moba_bmi_e_8m	rs2209706	1	65931251	T	C	0.353678	-0.0779883	0.00600809	1.57725e-38
moba_bmi_e_8m	rs2248162	6	29915061	T	C	0.327361	0.0412341	0.00612129	1.62592e-11
moba_bmi_e_8m	rs226064	1	44804161	A	G	0.350933	0.0332039	0.00603497	3.7569e-08
moba_bmi_e_8m	rs2268647	6	39043178	C	T	0.500443	-0.0449073	0.0057566	6.14045e-15
moba_bmi_e_8m	rs2272368	12	124811855	A	G	0.85775	0.0522855	0.00821888	1.99632e-10
moba_bmi_e_8m	rs2359006	12	51314760	A	C	0.316578	-0.0353305	0.00616979	1.02598e-08
moba_bmi_e_8m	rs2378662	9	86707289	G	A	0.453991	-0.036729	0.00578266	2.13108e-10
moba_bmi_e_8m	rs2735154	7	38376797	G	C	0.770282	0.0377994	0.00688843	4.07934e-08
moba_bmi_e_8m	rs2737670	1	200071286	G	A	0.550665	-0.0451007	0.00578725	6.53732e-15
moba_bmi_e_8m	rs2767486	1	65991203	A	G	0.838416	-0.118144	0.00779949	7.85778e-52
moba_bmi_e_8m	rs2815764	1	72754123	A	G	0.184415	-0.0493646	0.00741294	2.75233e-11
moba_bmi_e_8m	rs282096	6	154263279	T	C	0.349824	-0.0335276	0.0059866	2.13816e-08
moba_bmi_e_8m	rs28457693	9	98217348	A	G	0.870115	-0.0602953	0.00853242	1.58782e-12
moba_bmi_e_8m	rs3017095	11	62178624	G	A	0.667949	0.0434331	0.00610672	1.14078e-12
moba_bmi_e_8m	rs34093408	10	102156571	T	C	0.928648	-0.0637271	0.0110884	9.07423e-09
moba_bmi_e_8m	rs35493868	7	73039406	C	G	0.798047	0.0599651	0.00715463	5.2348e-17
moba_bmi_e_8m	rs35628463	2	653581	G	A	0.833601	0.050562	0.00772077	5.79963e-11
moba_bmi_e_8m	rs4594227	15	84497207	A	G	0.551589	0.0514291	0.00574256	3.37287e-19
moba_bmi_e_8m	rs4762908	12	20108215	G	C	0.481634	0.0315344	0.00574692	4.08395e-08
moba_bmi_e_8m	rs4922793	11	27729505	A	G	0.790344	0.0437534	0.00699905	4.06977e-10
moba_bmi_e_8m	rs57566934	14	101135876	C	T	0.922002	0.0606648	0.0106521	1.23302e-08
moba_bmi_e_8m	rs6058077	20	33140999	G	A	0.162996	-0.0422262	0.00773877	4.85747e-08
moba_bmi_e_8m	rs61974201	14	27954477	T	C	0.651635	0.040435	0.00599473	1.52933e-11
moba_bmi_e_8m	rs62062567	16	75445238	G	T	0.428138	-0.0327214	0.00579939	1.67884e-08
moba_bmi_e_8m	rs62175559	2	160955833	G	A	0.539628	0.0379134	0.00575721	4.53733e-11
moba_bmi_e_8m	rs62271373	3	150066540	T	A	0.951329	0.077488	0.0133082	5.79482e-09
moba_bmi_e_8m	rs62416825	6	55130795	A	T	0.768933	0.0431363	0.00680019	2.2475e-10
moba_bmi_e_8m	rs62425398	6	166416028	C	A	0.893026	-0.0528449	0.00934451	1.55679e-08
moba_bmi_e_8m	rs6493361	15	49615952	G	C	0.331397	0.0349639	0.00607963	8.87258e-09
moba_bmi_e_8m	rs670318	1	63727542	T	C	0.0517912	0.104022	0.0130985	1.99756e-15
moba_bmi_e_8m	rs6767671	3	25106760	G	T	0.433505	-0.0315283	0.00577196	4.69959e-08
moba_bmi_e_8m	rs7020491	9	128144477	C	T	0.559428	0.0336357	0.00575746	5.15454e-09
moba_bmi_e_8m	rs7116989	11	12856087	G	A	0.28937	0.0436086	0.00632696	5.48151e-12
moba_bmi_e_8m	rs72731580	4	145412105	C	T	0.721311	-0.0396601	0.00639834	5.7002e-10
moba_bmi_e_8m	rs76555405	16	67251378	C	T	0.962959	-0.105814	0.0151912	3.27341e-12
moba_bmi_e_8m	rs7749433	6	100674799	C	A	0.242877	0.0391919	0.00671805	5.41726e-09
moba_bmi_e_8m	rs7764413	6	31242082	T	C	0.465034	0.0398169	0.00574648	4.24033e-12
moba_bmi_e_8m	rs7768953	6	39136110	C	T	0.960777	-0.089223	0.0148406	1.83168e-09
moba_bmi_e_8m	rs77783553	14	100574191	C	T	0.976134	0.119	0.0187391	2.14813e-10
moba_bmi_e_8m	rs79172804	17	43828764	G	A	0.851766	0.0554037	0.00810147	7.99098e-12
moba_bmi_e_8m	rs79225222	1	214678564	T	C	0.931935	0.0661619	0.0114174	6.83959e-09
moba_bmi_e_8m	rs8103728	19	33900257	C	G	0.338128	-0.0351144	0.00604346	6.23563e-09
moba_bmi_e_8m	rs8117463	20	17231063	G	A	0.659297	0.038265	0.0060514	2.55971e-10
moba_bmi_e_8m	rs853849	20	31439355	A	G	0.436688	0.037698	0.00579097	7.52662e-11
moba_bmi_e_8m	rs9394485	6	38254520	G	A	0.984286	0.127322	0.0230967	3.53655e-08
moba_bmi_e_8m	rs9860851	3	168919295	G	A	0.907643	-0.0546627	0.00988061	3.16024e-08
moba_bmi_f_1y	rs10251787	7	126842035	T	C	0.732138	-0.0357046	0.00647379	3.48281e-08
moba_bmi_f_1y	rs1044531	9	117098650	C	T	0.0982006	-0.0642555	0.00966371	2.94781e-11
moba_bmi_f_1y	rs1046011	1	65898996	C	T	0.681331	0.0872824	0.0061624	1.53674e-45
moba_bmi_f_1y	rs10494808	1	200089872	C	T	0.551453	-0.0435617	0.00577092	4.40352e-14
moba_bmi_f_1y	rs10494981	1	214721975	C	G	0.923019	0.0628449	0.0107898	5.72954e-09
moba_bmi_f_1y	rs10747592	12	51182122	C	T	0.307788	-0.0380484	0.00620832	8.86482e-10
moba_bmi_f_1y	rs10821143	9	96263813	G	C	0.627885	-0.0451981	0.00589986	1.84672e-14
moba_bmi_f_1y	rs11030616	11	29236130	A	T	0.762832	-0.037115	0.00674466	3.73654e-08
moba_bmi_f_1y	rs116600817	17	7458795	A	G	0.738223	0.0420546	0.00649298	9.36052e-11
moba_bmi_f_1y	rs11900786	2	158508271	T	C	0.108489	0.0757863	0.00926871	2.92012e-16
moba_bmi_f_1y	rs11964854	6	39018493	A	C	0.732352	-0.0648136	0.00653966	3.73422e-23
moba_bmi_f_1y	rs12490258	3	172064494	T	C	0.316998	0.0347052	0.00617773	1.93419e-08
moba_bmi_f_1y	rs13165926	5	64039871	A	C	0.773077	0.0463602	0.00685872	1.38644e-11
moba_bmi_f_1y	rs145775785	12	65902265	C	T	0.982575	-0.135077	0.021911	7.05684e-10
moba_bmi_f_1y	rs156349	20	1838222	C	A	0.636703	0.0347966	0.0059582	5.21639e-09
moba_bmi_f_1y	rs1670262	15	99597353	A	G	0.286307	0.0398409	0.00634905	3.4943e-10
moba_bmi_f_1y	rs17309874	11	27667236	G	A	0.72852	-0.0412368	0.00644181	1.53936e-10
moba_bmi_f_1y	rs174530	11	61546592	A	G	0.613173	-0.0405488	0.00588167	5.42001e-12
moba_bmi_f_1y	rs176778	14	77885663	G	A	0.442068	0.0316571	0.00579578	4.70576e-08
moba_bmi_f_1y	rs17777059	16	81528953	A	G	0.766025	-0.0377472	0.00675088	2.25175e-08
moba_bmi_f_1y	rs209421	6	83523684	G	T	0.262298	0.0436937	0.00652392	2.1208e-11
moba_bmi_f_1y	rs216197	17	2201944	A	G	0.376386	0.0333459	0.00591067	1.6843e-08
moba_bmi_f_1y	rs2268647	6	39043178	C	T	0.500314	-0.0478145	0.00575352	9.53016e-17
moba_bmi_f_1y	rs2378662	9	86707289	G	A	0.453968	-0.0342345	0.00578419	3.24631e-09
moba_bmi_f_1y	rs2764261	6	108927842	A	G	0.372987	-0.0350181	0.00595009	3.9732e-09
moba_bmi_f_1y	rs28648976	12	124807433	A	G	0.874214	0.0513995	0.00864771	2.78631e-09
moba_bmi_f_1y	rs300132	6	166417218	G	C	0.373973	0.0339292	0.00593623	1.09313e-08
moba_bmi_f_1y	rs3017099	11	62175433	A	T	0.667494	0.0368402	0.00610208	1.56686e-09
moba_bmi_f_1y	rs34020954	1	72742387	C	T	0.810725	0.0505174	0.00734049	5.90065e-12
moba_bmi_f_1y	rs35368205	7	73017657	C	T	0.802568	0.0429693	0.00721922	2.64783e-09
moba_bmi_f_1y	rs35971550	1	66036614	G	C	0.97524	-0.116402	0.0184576	2.85555e-10
moba_bmi_f_1y	rs4575361	12	124410529	A	T	0.690625	-0.0349894	0.00617523	1.461e-08
moba_bmi_f_1y	rs458036	5	55816081	A	C	0.259883	0.0377722	0.00652812	7.20527e-09
moba_bmi_f_1y	rs4594227	15	84497207	A	G	0.551622	0.0398918	0.00574268	3.74369e-12
moba_bmi_f_1y	rs4650277	1	74993721	A	G	0.435709	0.040673	0.00578331	2.02395e-12
moba_bmi_f_1y	rs4869277	5	95615651	T	G	0.303781	0.0614881	0.00623419	6.02005e-23
moba_bmi_f_1y	rs61974201	14	27954477	T	C	0.651548	0.0398286	0.00599886	3.15065e-11
moba_bmi_f_1y	rs62104180	2	466003	G	A	0.966068	0.0893577	0.0158973	1.89907e-08
moba_bmi_f_1y	rs670318	1	63727542	T	C	0.0518791	0.0969145	0.0130922	1.3369e-13
moba_bmi_f_1y	rs6752378	2	25150116	C	A	0.511003	-0.0730692	0.00572966	3.00677e-37
moba_bmi_f_1y	rs6752706	2	629831	T	C	0.168433	-0.0553822	0.00768923	5.90881e-13
moba_bmi_f_1y	rs6769442	3	171565463	G	A	0.763557	0.0382568	0.00680275	1.86883e-08
moba_bmi_f_1y	rs7116989	11	12856087	G	A	0.289129	0.046476	0.00632998	2.10087e-13
moba_bmi_f_1y	rs7250869	19	33887405	T	C	0.319756	-0.0381509	0.00614865	5.47823e-10
moba_bmi_f_1y	rs75098903	3	39320644	C	T	0.975643	0.101677	0.0185945	4.548e-08
moba_bmi_f_1y	rs75614054	9	98275789	C	T	0.88223	-0.0630576	0.0089153	1.5167e-12
moba_bmi_f_1y	rs77439332	2	161208194	C	T	0.873632	0.0546253	0.00867662	3.06034e-10
moba_bmi_f_1y	rs775725	3	77641929	C	T	0.42614	0.0349483	0.00581764	1.8863e-09
moba_bmi_f_1y	rs8041781	15	49590114	T	C	0.726536	-0.036493	0.00641802	1.30029e-08
moba_bmi_f_1y	rs8117463	20	17231063	G	A	0.659486	0.0382167	0.00605471	2.75645e-10
moba_bmi_f_1y	rs853849	20	31439355	A	G	0.436654	0.0366813	0.00579072	2.38106e-10
moba_bmi_f_1y	rs926592	6	32305658	C	A	0.772344	-0.0444356	0.00684731	8.61192e-11
moba_bmi_f_1y	rs942861	1	65798843	G	A	0.367237	0.0366662	0.00598098	8.76234e-10
moba_bmi_f_1y	rs9661614	1	110021837	T	C	0.68498	-0.0352175	0.00619209	1.28911e-08
moba_bmi_f_1y	rs9860851	3	168919295	G	A	0.907769	-0.0555353	0.0098871	1.94366e-08
moba_bmi_g_16m	rs10520573	15	84591575	A	G	0.514717	0.0393965	0.00667921	3.67096e-09
moba_bmi_g_16m	rs10992792	9	96352243	T	A	0.623448	-0.0493663	0.00691075	9.10542e-13
moba_bmi_g_16m	rs11209948	1	72811904	G	T	0.405091	-0.0433789	0.00681453	1.94469e-10
moba_bmi_g_16m	rs11900786	2	158508271	T	C	0.107868	0.0591447	0.0108492	4.99367e-08
moba_bmi_g_16m	rs11964854	6	39018493	A	C	0.731213	-0.0545647	0.00762323	8.2054e-13
moba_bmi_g_16m	rs1371753	11	12853703	G	A	0.386362	0.0403973	0.00689667	4.69862e-09
moba_bmi_g_16m	rs151088306	12	65869436	A	C	0.982627	-0.156341	0.0256548	1.10106e-09
moba_bmi_g_16m	rs17127832	1	66096925	T	C	0.832354	-0.0631063	0.00896738	1.95975e-12
moba_bmi_g_16m	rs174530	11	61546592	A	G	0.612729	-0.0385534	0.00687624	2.06148e-08
moba_bmi_g_16m	rs179269	6	39102619	A	G	0.375083	-0.0457059	0.00690177	3.5359e-11
moba_bmi_g_16m	rs2031626	1	157059785	A	C	0.539718	0.0380103	0.00675415	1.82621e-08
moba_bmi_g_16m	rs2355595	8	64780939	C	T	0.635727	-0.0420903	0.006965	1.51165e-09
moba_bmi_g_16m	rs2378662	9	86707289	G	A	0.455093	-0.0405167	0.00675768	2.02675e-09
moba_bmi_g_16m	rs2767486	1	65991203	A	G	0.838716	-0.0954927	0.00910792	1.01695e-25
moba_bmi_g_16m	rs2958542	11	62181882	C	T	0.639363	0.0396728	0.0070142	1.54878e-08
moba_bmi_g_16m	rs3790806	1	200087926	C	T	0.540872	-0.0463117	0.00671767	5.42375e-12
moba_bmi_g_16m	rs4869278	5	95616462	A	C	0.303904	0.0532509	0.0072761	2.50553e-13
moba_bmi_g_16m	rs4968054	16	89690079	C	T	0.895249	-0.0616916	0.0109858	1.95912e-08
moba_bmi_g_16m	rs55865721	19	33832399	G	A	0.941899	0.0795635	0.0144318	3.52614e-08
moba_bmi_g_16m	rs6119946	20	31329704	G	A	0.567689	0.0380441	0.00676796	1.89636e-08
moba_bmi_g_16m	rs67554133	6	25866232	T	A	0.922519	-0.0803224	0.0125417	1.50907e-10
moba_bmi_g_16m	rs7591460	2	25103967	A	C	0.583832	-0.0689464	0.00678724	3.04509e-24
moba_bmi_g_16m	rs889399	16	69556583	C	G	0.554522	0.0387481	0.00671797	8.03008e-09
moba_bmi_h_2y	rs10156602	9	96345328	A	G	0.608255	-0.0431268	0.00691995	4.5978e-10
moba_bmi_h_2y	rs11209948	1	72811904	G	T	0.4048	-0.0375022	0.00686202	4.62424e-08
moba_bmi_h_2y	rs151088306	12	65869436	A	C	0.982692	-0.14774	0.0259299	1.21462e-08
moba_bmi_h_2y	rs179269	6	39102619	A	G	0.374723	-0.0428111	0.00694829	7.21141e-10
moba_bmi_h_2y	rs2378662	9	86707289	G	A	0.455078	-0.0417891	0.00680642	8.2697e-10
moba_bmi_h_2y	rs2767486	1	65991203	A	G	0.838635	-0.0748942	0.009166	3.06196e-16
moba_bmi_h_2y	rs2933170	11	29135383	A	G	0.735582	0.0445288	0.00767154	6.45907e-09
moba_bmi_h_2y	rs35414122	16	89742979	A	G	0.877645	-0.0580761	0.0102745	1.58187e-08
moba_bmi_h_2y	rs41301283	1	110049457	G	A	0.935962	-0.0764461	0.0137746	2.86042e-08
moba_bmi_h_2y	rs4650277	1	74993721	A	G	0.435866	0.0369913	0.00678459	4.9737e-08
moba_bmi_h_2y	rs4869278	5	95616462	A	C	0.303857	0.0481811	0.00733725	5.14636e-11
moba_bmi_h_2y	rs62104180	2	466003	G	A	0.965706	0.103465	0.0186221	2.75962e-08
moba_bmi_h_2y	rs663533	1	113128804	G	C	0.452895	-0.0371295	0.00679641	4.67864e-08
moba_bmi_h_2y	rs7591460	2	25103967	A	C	0.583965	-0.0744792	0.00684456	1.41189e-27
moba_bmi_h_2y	rs7750764	6	100722593	C	T	0.870414	-0.0548375	0.0100482	4.83103e-08
moba_bmi_i_3y	rs10156602	9	96345328	A	G	0.608368	-0.0388524	0.00693198	2.08487e-08
moba_bmi_i_3y	rs10835484	11	29138714	T	C	0.736195	0.0419719	0.00769093	4.8337e-08
moba_bmi_i_3y	rs11676272	2	25141538	A	G	0.513318	-0.0647973	0.00673506	6.5268e-22
moba_bmi_i_3y	rs151088306	12	65869436	A	C	0.982475	-0.15345	0.0257848	2.6622e-09
moba_bmi_i_3y	rs1837269	5	95859144	C	T	0.412722	0.0428624	0.00682635	3.4084e-10
moba_bmi_i_3y	rs2767486	1	65991203	A	G	0.838262	-0.0626687	0.00916005	7.8361e-12
moba_bmi_i_3y	rs34874247	1	72744950	C	G	0.811161	0.0501796	0.00862514	5.9617e-09
moba_bmi_i_3y	rs61888800	11	27722278	G	T	0.727679	-0.0423975	0.00756124	2.05599e-08
moba_bmi_i_3y	rs633715	1	177852580	T	C	0.765486	-0.0521275	0.00794557	5.3592e-11
moba_bmi_i_3y	rs76111507	2	455477	C	T	0.977034	0.134546	0.0225588	2.45782e-09
moba_bmi_i_3y	rs9266043	6	31318630	A	G	0.324178	0.0441009	0.00719813	8.97078e-10
moba_bmi_i_3y	rs9374040	6	108997435	G	A	0.282168	-0.0412148	0.00755708	4.93049e-08
moba_bmi_j_5y	rs10185143	2	25150758	T	C	0.506106	-0.0699091	0.0074732	8.3888e-21
moba_bmi_j_5y	rs10938398	4	45186139	G	A	0.583458	-0.0438312	0.00760082	8.0863e-09
moba_bmi_j_5y	rs34579341	1	72745962	A	G	0.809522	0.0552138	0.00949977	6.16865e-09
moba_bmi_j_5y	rs36055936	1	177816796	G	T	0.776649	-0.0671534	0.00897576	7.34007e-14
moba_bmi_j_5y	rs4279921	10	2668468	T	C	0.474886	0.0434965	0.00750177	6.70471e-09
moba_bmi_j_5y	rs62104180	2	466003	G	A	0.965972	0.12979	0.0207282	3.81276e-10
moba_bmi_j_5y	rs6604867	1	74992278	T	C	0.4356	0.0509776	0.00750625	1.11096e-11
moba_bmi_j_5y	rs7132908	12	50263148	G	A	0.596642	-0.0488668	0.00763062	1.51325e-10
moba_bmi_j_5y	rs76555405	16	67251378	C	T	0.962933	-0.111662	0.0198547	1.86612e-08
moba_bmi_k_7y	rs10938398	4	45186139	G	A	0.583962	-0.0469204	0.0074582	3.15174e-10
moba_bmi_k_7y	rs11676272	2	25141538	A	G	0.512214	-0.0653969	0.00731829	4.03181e-19
moba_bmi_k_7y	rs12748679	1	72644585	T	C	0.798753	0.0572992	0.00916637	4.07774e-10
moba_bmi_k_7y	rs1320336	2	650012	G	A	0.83136	0.0811915	0.00981644	1.32862e-16
moba_bmi_k_7y	rs1336242	6	101199634	C	T	0.534555	0.042623	0.00735247	6.74714e-09
moba_bmi_k_7y	rs1519480	11	27675712	C	T	0.332806	0.0452459	0.00775809	5.47381e-09
moba_bmi_k_7y	rs17782313	18	57851097	T	C	0.743153	-0.0561888	0.00837823	1.99297e-11
moba_bmi_k_7y	rs1795443	3	77739718	A	G	0.255053	0.0463364	0.00845379	4.226e-08
moba_bmi_k_7y	rs2076308	6	50791640	G	C	0.811862	-0.0604182	0.00936744	1.11993e-10
moba_bmi_k_7y	rs4650277	1	74993721	A	G	0.436214	0.0612008	0.00739459	1.26911e-16
moba_bmi_k_7y	rs506589	1	177894287	T	C	0.771626	-0.0829975	0.00873274	2.01651e-21
moba_bmi_k_7y	rs62033413	16	53830055	C	G	0.582839	-0.0595501	0.0074234	1.04088e-15
moba_bmi_k_7y	rs62104180	2	466003	G	A	0.966186	0.135467	0.020373	2.94374e-11
moba_bmi_k_7y	rs7132908	12	50263148	G	A	0.594894	-0.0594758	0.00746665	1.64513e-15
moba_bmi_k_7y	rs77226405	18	58077260	C	A	0.96798	0.129907	0.0208	4.22435e-10
moba_bmi_k_7y	rs78425303	3	141300386	G	C	0.943207	-0.086603	0.0157763	4.032e-08
moba_bmi_l_8y	rs10192350	2	652607	T	C	0.831075	0.0707201	0.0112262	2.98518e-10
moba_bmi_l_8y	rs11676272	2	25141538	A	G	0.515509	-0.0732357	0.00838628	2.48428e-18
moba_bmi_l_8y	rs13196561	6	100760170	C	A	0.795538	-0.0601696	0.0104543	8.63794e-09
moba_bmi_l_8y	rs17309874	11	27667236	G	A	0.727741	-0.0566805	0.00941739	1.75813e-09
moba_bmi_l_8y	rs35626515	16	28649651	C	A	0.590807	-0.0506279	0.00855214	3.22107e-09
moba_bmi_l_8y	rs36075373	1	72636749	A	T	0.79778	0.0606414	0.0104846	7.29978e-09
moba_bmi_l_8y	rs3895907	1	75006027	A	G	0.435779	0.0643529	0.00844592	2.54859e-14
moba_bmi_l_8y	rs4279921	10	2668468	T	C	0.476534	0.0494819	0.00847862	5.34429e-09
moba_bmi_l_8y	rs476828	18	57852587	T	C	0.742968	-0.0804366	0.00963521	6.93107e-17
moba_bmi_l_8y	rs545608	1	177899121	G	C	0.770664	-0.10842	0.0100134	2.55035e-27
moba_bmi_l_8y	rs62405419	6	50787459	G	T	0.887511	-0.0809267	0.0133164	1.22293e-09
moba_bmi_l_8y	rs7132908	12	50263148	G	A	0.597271	-0.0711305	0.00855257	9.03233e-17
moba_bmi_l_8y	rs7601586	2	6209081	A	G	0.676927	0.0537992	0.00900023	2.26537e-09
moba_bmi_l_8y	rs76111507	2	455477	C	T	0.978161	0.185815	0.0287905	1.08898e-10
moba_bmi_l_8y	rs77226405	18	58077260	C	A	0.968112	0.17349	0.0238332	3.35429e-13
moba_bmi_l_8y	rs9972653	16	53814363	G	T	0.591692	-0.0803884	0.00857534	6.95985e-21

## Sheet: 3 Ind. MoBa signals
minP_timepoint	SNP	CHR	BP	effect_allele	other_allele	A1FREQ	BETA	SE	P	egg_childBMI_beta	egg_childBMI_P	egg_childBMI_signal	egg_childBMI_signal_r2	egg_childBMI_signal_p	Proxy Helgeland	Proxy Helgeland r2
moba_bmi_b_6w	rs75233715	1	221288313	T	A	0.900657	0.0616166	0.0112201	3.98281e-08	0.0115	0.4035
moba_bmi_b_6w	rs5418	17	7185092	G	A	0.449608	-0.039403	0.00670494	4.18504e-09	-0.0065	0.4118				rs739669	0.5285
moba_bmi_c_3m	rs75790195	2	158148167	T	C	0.975525	0.104801	0.0177255	3.37031e-09	0.0302	0.1555
moba_bmi_c_3m	rs58631773	2	176195103	T	G	0.90774	0.055551	0.00951887	5.35069e-09	-0.0257	0.0409
moba_bmi_c_3m	rs4975311	4	143500223	A	G	0.266251	-0.0457876	0.00620784	1.6338e-13	-0.007	0.4069
moba_bmi_c_3m	rs1160705	5	25128668	C	T	0.574572	0.0309887	0.00554051	2.23039e-08	0.005	0.5113
moba_bmi_c_3m	rs9394485	6	38254520	G	A	0.984459	0.133294	0.0222111	1.95817e-09
moba_bmi_c_3m	rs4721112	7	1889466	T	C	0.39079	-0.0320096	0.00560814	1.14517e-08	-0.01	0.202
moba_bmi_c_3m	rs11973042	7	13529463	G	A	0.847895	0.0447562	0.00774595	7.5591e-09	0.0223	0.06207
moba_bmi_c_3m	rs12343333	9	109620811	T	C	0.68361	0.0349443	0.00589792	3.12594e-09	-0.0024	0.7756
moba_bmi_c_3m	rs11190095	10	101201376	A	G	0.986171	0.137922	0.0233703	3.5999e-09
moba_bmi_c_3m	rs11022015	11	11766945	T	C	0.593094	-0.033127	0.00560698	3.459e-09	-0.0074	0.3372
moba_bmi_c_3m	rs117473235	11	26535881	T	C	0.983451	-0.118413	0.0215502	3.91318e-08
moba_bmi_c_3m	rs72874467	11	27981992	C	T	0.859574	-0.0437653	0.00799903	4.46673e-08	-0.0201	0.0969
moba_bmi_c_3m	rs10160596	11	65351364	G	A	0.733042	-0.0487736	0.00623339	5.09448e-15	-0.0183	0.04634				rs2298615	0.7537
moba_bmi_c_3m	rs12230843	12	20105947	T	G	0.486315	0.0431993	0.00549717	3.88866e-15	-0.0185	0.0144				rs2728641	0.8839
moba_bmi_c_3m	rs7967455	12	20293797	G	A	0.875498	-0.0463959	0.00828872	2.175e-08	-0.0129	0.2768
moba_bmi_c_3m	rs12454103	18	35271023	C	A	0.827381	0.0409387	0.0072558	1.67884e-08	0.0051	0.6246
moba_bmi_c_3m	rs1998200	20	57309234	A	G	0.572303	0.0333973	0.00555112	1.78443e-09	0.0034	0.6664
moba_bmi_d_6m	rs942861	1	65798843	G	A	0.367043	0.0354477	0.00562137	2.86563e-10	-0.0017	0.833
moba_bmi_d_6m	rs74082072	1	65970925	T	C	0.904405	-0.0506919	0.00918978	3.46577e-08	-0.0126	0.3545
moba_bmi_d_6m	rs2767486	1	65991203	A	G	0.838491	-0.119799	0.00733969	6.87227e-60	-0.0333	0.0006991				rs2767486	1
moba_bmi_d_6m	rs17127776	1	66077805	A	G	0.839679	-0.0760915	0.0073764	5.99515e-25	0.0083	0.4347
moba_bmi_d_6m	rs6693754	1	163139984	C	T	0.418393	0.0300457	0.00548166	4.22591e-08	0.0066	0.3908
moba_bmi_d_6m	rs10494808	1	200089872	C	T	0.551941	-0.0493987	0.00543649	1.02282e-19	-0.0092	0.225				rs2816985	0.9223
moba_bmi_d_6m	rs2012704	2	28184766	T	A	0.526608	0.0324625	0.0054256	2.18796e-09	0.0179	0.02151
moba_bmi_d_6m	rs6751837	2	148387381	C	T	0.707666	0.0403627	0.00592912	9.92887e-12	0.0173	0.04185
moba_bmi_d_6m	rs11900786	2	158508271	T	C	0.108816	0.0907301	0.00870088	1.85353e-25	0.026	0.02316
moba_bmi_d_6m	rs59137532	2	160891552	A	C	0.972255	0.0998345	0.0164002	1.14773e-09	0.0092	0.684
moba_bmi_d_6m	rs957875	2	179384417	T	C	0.785419	0.0393432	0.0065643	2.05362e-09	0.0097	0.2842
moba_bmi_d_6m	rs57250041	2	191508220	T	A	0.888039	0.0469099	0.00858364	4.62818e-08	0.0014	0.9128
moba_bmi_d_6m	rs11889534	2	218393975	T	C	0.563452	0.034872	0.00547694	1.92681e-10	0.0129	0.09965
moba_bmi_d_6m	rs3796031	2	218712918	C	T	0.607014	-0.0313129	0.00554767	1.65814e-08	-0.0092	0.2317
moba_bmi_d_6m	rs6804842	3	25106437	A	G	0.4281	-0.0299797	0.00543088	3.38563e-08	0.0016	0.8283
moba_bmi_d_6m	rs34136796	3	50337032	C	A	0.604096	-0.0312349	0.00552586	1.58128e-08	-0.027	0.0008022
moba_bmi_d_6m	rs28544066	4	149778462	C	T	0.817708	-0.0546928	0.00693623	3.1434e-15	-0.01	0.3048
moba_bmi_d_6m	rs2033237	5	50596784	T	C	0.711059	-0.0341998	0.00594297	8.6818e-09	-0.0226	0.01161
moba_bmi_d_6m	rs61023343	5	63966957	A	C	0.358758	-0.0363555	0.00564066	1.15409e-10	0.0006	0.944
moba_bmi_d_6m	rs10519513	5	116840907	G	A	0.804243	-0.0449068	0.00680713	4.19469e-11	0.0109	0.2482
moba_bmi_d_6m	rs10061190	5	128376600	T	C	0.882685	0.0463687	0.00835813	2.89394e-08	-0.0055	0.6789
moba_bmi_d_6m	rs17287315	5	141827033	G	A	0.904326	0.0522287	0.00917831	1.26701e-08	0.0223	0.1083
moba_bmi_d_6m	rs31196	5	158300798	C	A	0.427957	-0.0306673	0.00544573	1.78715e-08	-0.0159	0.03676
moba_bmi_d_6m	rs28360623	6	39003992	C	T	0.753931	-0.0651178	0.00628114	3.49623e-25	-0.0181	0.04578				rs2268657	0.2582
moba_bmi_d_6m	rs179269	6	39102619	A	G	0.373372	-0.0652703	0.00557467	1.15478e-31	-0.0105	0.1812				rs1820721	0.4835
moba_bmi_d_6m	rs9357851	6	55097163	T	C	0.768601	0.042428	0.00639127	3.1703e-11	0.0317	0.0004052
moba_bmi_d_6m	rs209421	6	83523684	G	T	0.262646	0.0551998	0.0061407	2.49115e-19	0.0063	0.4512				rs209421	1
moba_bmi_d_6m	rs12198480	6	84342600	C	T	0.688697	0.033591	0.00585867	9.8349e-09	0.0182	0.0272
moba_bmi_d_6m	rs10499088	6	119027955	T	C	0.753137	-0.0365992	0.00628094	5.64209e-09	-0.0063	0.4539
moba_bmi_d_6m	rs35493868	7	73039406	C	G	0.797643	0.0655458	0.00672079	1.79639e-22	0.0103	0.3025				rs17145750	0.6691
moba_bmi_d_6m	rs10954754	7	84131879	G	A	0.859884	-0.0444708	0.00777519	1.0679e-08	-0.0102	0.3911
moba_bmi_d_6m	rs12154627	7	130422934	T	C	0.493761	0.0409486	0.0054103	3.77138e-14	0.0059	0.4543				rs287621	0.2983
moba_bmi_d_6m	rs2378662	9	86707289	G	A	0.453444	-0.0383058	0.00543423	1.80219e-12	-0.0344	1.137e-05
moba_bmi_d_6m	rs10868561	9	89956566	G	A	0.630238	0.0334025	0.00556741	1.97738e-09	-0.0016	0.837
moba_bmi_d_6m	rs75614054	9	98275789	C	T	0.88199	-0.06139	0.00837263	2.2636e-13	-0.0056	0.6712				rs28457693	0.9105
moba_bmi_d_6m	rs10817580	9	117039222	A	G	0.731109	0.034342	0.00609051	1.71431e-08	0.0191	0.02458
moba_bmi_d_6m	rs118170811	10	102366896	G	A	0.937542	-0.0680263	0.0110631	7.79992e-10	0.0196	0.375
moba_bmi_d_6m	rs7927865	11	12853841	G	A	0.289183	0.0472043	0.0059514	2.16272e-15	0.0027	0.7524
moba_bmi_d_6m	rs7107575	11	122845406	T	C	0.406201	-0.0316746	0.00549484	8.19351e-09	0.0148	0.05589
moba_bmi_d_6m	rs2731602	12	19955649	A	G	0.346095	0.0317095	0.00567591	2.31446e-08	-0.0198	0.01728
moba_bmi_d_6m	rs10877032	12	58270791	A	G	0.613418	-0.032681	0.00554713	3.82675e-09	-0.0126	0.1248
moba_bmi_d_6m	rs145775785	12	65902265	C	T	0.98239	-0.128048	0.0204771	4.02041e-10	-0.0374	0.2663
moba_bmi_d_6m	rs7305424	12	118399491	A	T	0.621896	-0.030497	0.00556954	4.35833e-08	-0.0185	0.02174
moba_bmi_d_6m	rs7307053	12	124494540	C	T	0.68693	-0.0377204	0.00578616	7.07457e-11	-0.0129	0.1162
moba_bmi_d_6m	rs2272368	12	124811855	A	G	0.857228	0.0501464	0.00771368	7.97995e-11	0.037	0.0003002				rs3741508	1
moba_bmi_d_6m	rs4396355	12	133058288	T	G	0.896042	-0.0498141	0.00885298	1.83565e-08	0.0042	0.7429
moba_bmi_d_6m	rs75876534	14	60075360	C	G	0.901062	0.0531471	0.00899419	3.44088e-09	0.0167	0.1861
moba_bmi_d_6m	rs6493361	15	49615952	G	C	0.331974	0.0429119	0.00571415	5.92379e-14	0.0148	0.0623
moba_bmi_d_6m	rs150390634	16	66723392	G	A	0.989224	-0.157055	0.0260687	1.69477e-09						rs111810144	0.1305
moba_bmi_d_6m	rs17777059	16	81528953	A	G	0.766138	-0.0388335	0.00634578	9.38275e-10	0.0023	0.7953
moba_bmi_d_6m	rs9893527	17	2164210	A	C	0.622079	-0.0358873	0.00554356	9.56313e-11	-0.0231	0.003516
moba_bmi_d_6m	rs9894621	17	12000584	A	G	0.445575	0.0373668	0.00541305	5.08862e-12	0.0192	0.01316
moba_bmi_d_6m	rs10491140	17	43950976	G	T	0.823562	0.0519438	0.00704711	1.69434e-13	-0.0113	0.3138
moba_bmi_d_6m	rs58879558	17	44095467	T	C	0.811815	0.0553317	0.00688009	8.81658e-16	-0.0149	0.147
moba_bmi_d_6m	rs4969072	17	71135799	G	A	0.622209	0.0306449	0.00554462	3.25852e-08	0.0102	0.2105
moba_bmi_d_6m	rs7407453	18	23313349	A	T	0.618948	-0.0330977	0.00553896	2.29483e-09	-0.0113	0.1567
moba_bmi_d_6m	rs3786915	19	33987424	T	G	0.678516	-0.0326354	0.00577813	1.62233e-08	-0.0019	0.8243
moba_bmi_d_6m	rs6058077	20	33140999	G	A	0.163472	-0.0422803	0.00728128	6.37133e-09	-0.0104	0.3246
moba_bmi_d_6m	rs2777939	20	62243810	C	T	0.11796	-0.045698	0.0083292	4.10025e-08	0.0228	0.03876
moba_bmi_d_6m	rs7287939	22	41396353	T	C	0.909894	0.0529453	0.00940529	1.8093e-08	-0.0141	0.3382
moba_bmi_e_8m	rs226064	1	44804161	A	G	0.350933	0.0332039	0.00603497	3.7569e-08	-0.0054	0.5096
moba_bmi_e_8m	rs670318	1	63727542	T	C	0.0517912	0.104022	0.0130985	1.99756e-15	0.0348	0.07894
moba_bmi_e_8m	rs62271373	3	150066540	T	A	0.951329	0.077488	0.0133082	5.79482e-09	0.0387	0.02486
moba_bmi_e_8m	rs72731580	4	145412105	C	T	0.721311	-0.0396601	0.00639834	5.7002e-10	0.004	0.6399				rs1032296	0.5195
moba_bmi_e_8m	rs13158163	5	95626870	C	T	0.696515	-0.0641759	0.00623259	7.28115e-25	-0.0034	0.678				rs6899303	0.2457
moba_bmi_e_8m	rs7768953	6	39136110	C	T	0.960777	-0.089223	0.0148406	1.83168e-09	0.0111	0.5383
moba_bmi_e_8m	rs7749433	6	100674799	C	A	0.242877	0.0391919	0.00671805	5.41726e-09	0.0206	0.01827
moba_bmi_e_8m	rs1293936	6	152017691	T	G	0.553208	0.0337027	0.00577552	5.36476e-09	0.0163	0.03754				rs7772579	0.3424
moba_bmi_e_8m	rs282096	6	154263279	T	C	0.349824	-0.0335276	0.0059866	2.13816e-08	-0.0107	0.1694				rs1772945	0.5127
moba_bmi_e_8m	rs10240765	7	13059992	G	A	0.754883	0.0384177	0.00663325	6.96851e-09	0.015	0.1046
moba_bmi_e_8m	rs2735154	7	38376797	G	C	0.770282	0.0377994	0.00688843	4.07934e-08	-0.0077	0.4193
moba_bmi_e_8m	rs7020491	9	128144477	C	T	0.559428	0.0336357	0.00575746	5.15454e-09	-0.0043	0.5828
moba_bmi_e_8m	rs3017095	11	62178624	G	A	0.667949	0.0434331	0.00610672	1.14078e-12	-0.003	0.705				rs1985927	0.51
moba_bmi_e_8m	rs61974201	14	27954477	T	C	0.651635	0.040435	0.00599473	1.52933e-11	0.0117	0.1491
moba_bmi_e_8m	rs77783553	14	100574191	C	T	0.976134	0.119	0.0187391	2.14813e-10	0.0547	0.1462
moba_bmi_e_8m	rs57566934	14	101135876	C	T	0.922002	0.0606648	0.0106521	1.23302e-08	0.0077	0.6182
moba_bmi_e_8m	rs1670262	15	99597353	A	G	0.286292	0.0447357	0.0063522	1.88756e-12	0.0087	0.3003
moba_bmi_e_8m	rs76555405	16	67251378	C	T	0.962959	-0.105814	0.0151912	3.27341e-12	-0.0627	0.004764				rs111810144	0.8704
moba_bmi_e_8m	rs62062567	16	75445238	G	T	0.428138	-0.0327214	0.00579939	1.67884e-08	-0.0068	0.3824
moba_bmi_e_8m	rs13339044	16	77687685	C	A	0.981693	0.117967	0.0213709	3.3907e-08	0.0599	0.009548
moba_bmi_e_8m	rs116600817	17	7458795	A	G	0.738375	0.048322	0.00649416	1.00046e-13	0.018	0.03827
moba_bmi_e_8m	rs2051821	17	46143515	T	C	0.792339	0.0402242	0.00703255	1.06701e-08	0.0165	0.06802
moba_bmi_e_8m	rs8117463	20	17231063	G	A	0.659297	0.038265	0.0060514	2.55971e-10	0.0186	0.0195
moba_bmi_e_8m	rs853849	20	31439355	A	G	0.436688	0.037698	0.00579097	7.52662e-11	0.0144	0.05332				rs13038017	0.6418
moba_bmi_e_8m	rs134666	22	29495254	G	A	0.298511	0.0369927	0.0062732	3.70305e-09	0.008	0.3513
moba_bmi_f_1y	rs34020954	1	72742387	C	T	0.810725	0.0505174	0.00734049	5.90065e-12	0.0539	4.821e-08	rs61765651	0.944768	9.503e-09
moba_bmi_f_1y	rs10494981	1	214721975	C	G	0.923019	0.0628449	0.0107898	5.72954e-09	0.0194	0.2176
moba_bmi_f_1y	rs6752378	2	25150116	C	A	0.511003	-0.0730692	0.00572966	3.00677e-37	-0.0701	7.49e-21	rs11676272	0.983643	2.373e-21	rs11676272	0.9604
moba_bmi_f_1y	rs77439332	2	161208194	C	T	0.873632	0.0546253	0.00867662	3.06034e-10	0.0088	0.505
moba_bmi_f_1y	rs75098903	3	39320644	C	T	0.975643	0.101677	0.0185945	4.548e-08	-0.0348	0.2316
moba_bmi_f_1y	rs9860851	3	168919295	G	A	0.907769	-0.0555353	0.0098871	1.94366e-08	-0.0121	0.3781
moba_bmi_f_1y	rs6769442	3	171565463	G	A	0.763557	0.0382568	0.00680275	1.86883e-08	0.013	0.1779
moba_bmi_f_1y	rs12490258	3	172064494	T	C	0.316998	0.0347052	0.00617773	1.93419e-08	0.0008	0.9254
moba_bmi_f_1y	rs458036	5	55816081	A	C	0.259883	0.0377722	0.00652812	7.20527e-09	0.0074	0.3818
moba_bmi_f_1y	rs13165926	5	64039871	A	C	0.773077	0.0463602	0.00685872	1.38644e-11	0.0154	0.07737
moba_bmi_f_1y	rs2268647	6	39043178	C	T	0.500314	-0.0478145	0.00575352	9.53016e-17	-0.0051	0.5037				rs2268647	1
moba_bmi_f_1y	rs2764261	6	108927842	A	G	0.372987	-0.0350181	0.00595009	3.9732e-09	-0.0131	0.1031
moba_bmi_f_1y	rs300132	6	166417218	G	C	0.373973	0.0339292	0.00593623	1.09313e-08	0.0115	0.1536
moba_bmi_f_1y	rs10251787	7	126842035	T	C	0.732138	-0.0357046	0.00647379	3.48281e-08	-0.0056	0.5225
moba_bmi_f_1y	rs10821143	9	96263813	G	C	0.627885	-0.0451981	0.00589986	1.84672e-14	-0.0331	3.398e-05
moba_bmi_f_1y	rs1044531	9	117098650	C	T	0.0982006	-0.0642555	0.00966371	2.94781e-11	-0.0131	0.2901
moba_bmi_f_1y	rs17309874	11	27667236	G	A	0.72852	-0.0412368	0.00644181	1.53936e-10	-0.0547	5.847e-10	rs56133711	0.904555	2.001e-10
moba_bmi_f_1y	rs174530	11	61546592	A	G	0.613173	-0.0405488	0.00588167	5.42001e-12	-0.0206	0.011
moba_bmi_f_1y	rs10747592	12	51182122	C	T	0.307788	-0.0380484	0.00620832	8.86482e-10	-0.0051	0.5311
moba_bmi_f_1y	rs176778	14	77885663	G	A	0.442068	0.0316571	0.00579578	4.70576e-08	0.01	0.2049
moba_bmi_f_1y	rs156349	20	1838222	C	A	0.636703	0.0347966	0.0059582	5.21639e-09	0.0019	0.8104
moba_bmi_g_16m	rs2031626	1	157059785	A	C	0.539718	0.0380103	0.00675415	1.82621e-08	0.0029	0.6981
moba_bmi_g_16m	rs2355595	8	64780939	C	T	0.635727	-0.0420903	0.006965	1.51165e-09	-0.0204	0.00998
moba_bmi_g_16m	rs10520573	15	84591575	A	G	0.514717	0.0393965	0.00667921	3.67096e-09	0.0283	0.0002443				rs2585058	0.2009
moba_bmi_g_16m	rs889399	16	69556583	C	G	0.554522	0.0387481	0.00671797	8.03008e-09	0.0236	0.002416
moba_bmi_g_16m	rs55865721	19	33832399	G	A	0.941899	0.0795635	0.0144318	3.52614e-08	0.0168	0.3576
moba_bmi_h_2y	rs41301283	1	110049457	G	A	0.935962	-0.0764461	0.0137746	2.86042e-08	-0.0624	0.0001184	rs41279738	0.274131	1.296e-08
moba_bmi_h_2y	rs663533	1	113128804	G	C	0.452895	-0.0371295	0.00679641	4.67864e-08	-0.0092	0.239
moba_bmi_h_2y	rs2933170	11	29135383	A	G	0.735582	0.0445288	0.00767154	6.45907e-09	0.0289	0.0004271
moba_bmi_h_2y	rs35414122	16	89742979	A	G	0.877645	-0.0580761	0.0102745	1.58187e-08	-0.027	0.02882
moba_bmi_i_3y	rs1837269	5	95859144	C	T	0.412722	0.0428624	0.00682635	3.4084e-10	0.0211	0.006131				rs263377	0.4453
moba_bmi_i_3y	rs9266043	6	31318630	A	G	0.324178	0.0441009	0.00719813	8.97078e-10	0.0189	0.0355
moba_bmi_k_7y	rs4650277	1	74993721	A	G	0.436214	0.0612008	0.00739459	1.26911e-16	0.0567	1.73e-13	rs12042908	0.988618	2.765e-14	rs10493544	0.9599
moba_bmi_k_7y	rs62104180	2	466003	G	A	0.966186	0.135467	0.020373	2.94374e-11	0.0929	1.191e-05				rs77165542	0.698
moba_bmi_k_7y	rs1320336	2	650012	G	A	0.83136	0.0811915	0.00981644	1.32862e-16	0.1008	3.716e-22	rs939584	0.95112	8.852e-26
moba_bmi_k_7y	rs1795443	3	77739718	A	G	0.255053	0.0463364	0.00845379	4.226e-08	0.0327	0.0001596
moba_bmi_k_7y	rs78425303	3	141300386	G	C	0.943207	-0.086603	0.0157763	4.032e-08	-0.0555	0.002589
moba_bmi_k_7y	rs10938398	4	45186139	G	A	0.583962	-0.0469204	0.0074582	3.15174e-10	-0.0398	4.31e-07	rs12641981	0.995965	4.187e-08
moba_bmi_k_7y	rs2076308	6	50791640	G	C	0.811862	-0.0604182	0.00936744	1.11993e-10	-0.0697	1.585e-12	rs2076308	1	1.585e-12
moba_bmi_k_7y	rs1336242	6	101199634	C	T	0.534555	0.042623	0.00735247	6.74714e-09	0.018	0.01677
moba_bmi_l_8y	rs545608	1	177899121	G	C	0.770664	-0.10842	0.0100134	2.55035e-27	-0.0726	3.159e-14	rs543874	0.994891	1.616e-15	rs545608	1
moba_bmi_l_8y	rs7601586	2	6209081	A	G	0.676927	0.0537992	0.00900023	2.26537e-09	0.0233	0.004359
moba_bmi_l_8y	rs4279921	10	2668468	T	C	0.476534	0.0494819	0.00847862	5.34429e-09	0.0168	0.02914
moba_bmi_l_8y	rs7132908	12	50263148	G	A	0.597271	-0.0711305	0.00855257	9.03233e-17	-0.0704	1.124e-18	rs7138803	0.872415	7.115e-20	rs7132908	1
moba_bmi_l_8y	rs35626515	16	28649651	C	A	0.590807	-0.0506279	0.00855214	3.22107e-09	-0.0239	0.004968
moba_bmi_l_8y	rs9972653	16	53814363	G	T	0.591692	-0.0803884	0.00857534	6.95985e-21	-0.0638	2.993e-16	rs17817449	0.986098	1.69e-17	rs17817288	0.6666
moba_bmi_l_8y	rs476828	18	57852587	T	C	0.742968	-0.0804366	0.00963521	6.93107e-17	-0.0521	4.614e-09	rs571312	0.978022	1.996e-10
moba_bmi_l_8y	rs77226405	18	58077260	C	A	0.968112	0.17349	0.0238332	3.35429e-13	0.129	5.106e-05

## Sheet: 4 MoBa h2 & rg
MoBa BMI time point	Phenotype	Age	rg	se	z	p	gcov_int		Source	phenotype	timepoint	h2_obs	h2_obs_se	h2_int	h2_int_se
birth	BMI	6w	0.5442	0.0438	12.4379	1.627e-35	0.322		MoBa	BMI	birth	0.1564	0.0131	1.1089	0.0101
birth	BMI	3m	0.3289	0.0421	7.8044	5.98e-15	0.2423		MoBa	BMI	6w	0.1833	0.0186	1.061	0.0089
birth	BMI	6m	0.2786	0.042	6.6353	3.2387e-11	0.1894		MoBa	BMI	3m	0.287	0.0211	1.2114	0.0131
birth	BMI	8m	0.2517	0.0421	5.9774	2.2668e-09	0.189		MoBa	BMI	6m	0.3492	0.0269	1.2912	0.0148
birth	BMI	1y	0.2771	0.0413	6.7141	1.8924e-11	0.2123		MoBa	BMI	8m	0.3742	0.027	1.1765	0.013
birth	BMI	16m	0.2691	0.0429	6.2757	3.4809e-10	0.1771		MoBa	BMI	1y	0.378	0.0261	1.1224	0.012
birth	BMI	2y	0.2368	0.0462	5.1245	2.9829e-07	0.1742		MoBa	BMI	16m	0.3325	0.0234	1.0445	0.0096
birth	BMI	3y	0.2395	0.0472	5.0759	3.8572e-07	0.1453		MoBa	BMI	2y	0.2915	0.0232	1.0339	0.0099
birth	BMI	5y	0.2806	0.0484	5.7973	6.7388e-09	0.1159		MoBa	BMI	3y	0.2361	0.0193	1.023	0.0091
birth	BMI	7y	0.2134	0.0463	4.607	4.0862e-06	0.1038		MoBa	BMI	5y	0.2565	0.0228	1.0251	0.0082
birth	BMI	8y	0.2295	0.0483	4.7489	2.045e-06	0.0928		MoBa	BMI	7y	0.2853	0.0249	1.0233	0.0085
birth	Body size	10y	0.1741	0.0257	6.7823	1.1826e-11	0.0199		MoBa	BMI	8y	0.3177	0.0292	1.0199	0.0077
birth	BMI	adult	0.1274	0.0238	5.3611	8.2702e-08	0.0163		UKBB	Body size	10y	0.153	0.0099	1.0242	0.0246
6w	BMI	birth	0.5442	0.0438	12.4379	1.627e-35	0.322		Yengo 2018	BMI	adult	0.2704	0.0096	1.0752	0.0258
6w	BMI	3m	0.9149	0.0214	42.8048	0	0.691
6w	BMI	6m	0.7714	0.0293	26.3141	1.3226e-152	0.541
6w	BMI	8m	0.7036	0.0325	21.6754	3.5017e-104	0.4076
6w	BMI	1y	0.6445	0.0356	18.0953	3.4697e-73	0.3261
6w	BMI	16m	0.628	0.0405	15.5207	2.513e-54	0.256
6w	BMI	2y	0.548	0.0446	12.2867	1.0675e-34	0.2202
6w	BMI	3y	0.5013	0.0502	9.9918	1.6556e-23	0.195
6w	BMI	5y	0.5152	0.0467	11.0338	2.6243e-28	0.1683
6w	BMI	7y	0.4233	0.0502	8.4306	3.4396e-17	0.14
6w	BMI	8y	0.2968	0.0553	5.3664	8.0304e-08	0.1409
6w	Body size	10y	0.3037	0.0392	7.7428	9.723e-15	0.0137
6w	BMI	adult	0.1563	0.0308	5.0708	3.9618e-07	0.0052
3m	BMI	birth	0.3289	0.0421	7.8044	5.98e-15	0.2423
3m	BMI	6w	0.9149	0.0214	42.8048	0	0.691
3m	BMI	6m	0.9397	0.0084	111.439	0	0.994
3m	BMI	8m	0.8705	0.0156	55.9158	0	0.7617
3m	BMI	1y	0.7941	0.0211	37.6395	4.85629999999999e-310	0.5988
3m	BMI	16m	0.7613	0.0276	27.6007	1.0925e-167	0.4364
3m	BMI	2y	0.6533	0.0336	19.4409	3.4814e-84	0.3616
3m	BMI	3y	0.5897	0.0401	14.6952	6.9173e-49	0.3035
3m	BMI	5y	0.5293	0.04	13.2393	5.2007e-40	0.2515
3m	BMI	7y	0.4075	0.0412	9.9007	4.1352e-23	0.2226
3m	BMI	8y	0.3121	0.0494	6.3118	2.7589e-10	0.2102
3m	Body size	10y	0.3871	0.0349	11.0879	1.4355e-28	0.019
3m	BMI	adult	0.1534	0.0273	5.6217	1.8914e-08	0.0118
6m	BMI	birth	0.2786	0.042	6.6353	3.2387e-11	0.1894
6m	BMI	6w	0.7714	0.0293	26.3141	1.3226e-152	0.541
6m	BMI	3m	0.9397	0.0084	111.439	0	0.994
6m	BMI	8m	0.989	0.0064	155.276	0	0.9697
6m	BMI	1y	0.9253	0.0119	77.4968	0	0.7801
6m	BMI	16m	0.898	0.0187	47.9359	0	0.5561
6m	BMI	2y	0.8011	0.0247	32.4534	4.8515e-231	0.4445
6m	BMI	3y	0.7226	0.0317	22.8192	2.9562e-115	0.3679
6m	BMI	5y	0.6057	0.0355	17.0636	2.7715e-65	0.294
6m	BMI	7y	0.4649	0.0386	12.0461	2.0342e-33	0.2601
6m	BMI	8y	0.3653	0.0456	8.0053	1.1919e-15	0.2354
6m	Body size	10y	0.4348	0.0323	13.4545	2.8973e-41	0.0215
6m	BMI	adult	0.1812	0.0247	7.3323	2.2631e-13	0.0047
8m	BMI	birth	0.2517	0.0421	5.9774	2.2668e-09	0.189
8m	BMI	6w	0.7036	0.0325	21.6754	3.5017e-104	0.4076
8m	BMI	3m	0.8705	0.0156	55.9158	0	0.7617
8m	BMI	6m	0.989	0.0064	155.276	0	0.9697
8m	BMI	1y	0.9786	0.0053	183.132	0	0.9374
8m	BMI	16m	0.9534	0.0118	80.7433	0	0.677
8m	BMI	2y	0.864	0.0178	48.4894	0	0.5451
8m	BMI	3y	0.7867	0.0255	30.8707	2.9543e-209	0.4451
8m	BMI	5y	0.6517	0.035	18.6309	1.8032e-77	0.3444
8m	BMI	7y	0.5186	0.0366	14.1574	1.6798e-45	0.2889
8m	BMI	8y	0.3905	0.0448	8.7249	2.665e-18	0.2621
8m	Body size	10y	0.4645	0.0314	14.8113	1.2385e-49	0.0283
8m	BMI	adult	0.1877	0.0242	7.7422	9.7719e-15	0.0122
1y	BMI	birth	0.2771	0.0413	6.7141	1.8924e-11	0.2123
1y	BMI	6w	0.6445	0.0356	18.0953	3.4697e-73	0.3261
1y	BMI	3m	0.7941	0.0211	37.6395	4.85629999999999e-310	0.5988
1y	BMI	6m	0.9253	0.0119	77.4968	0	0.7801
1y	BMI	8m	0.9786	0.0053	183.132	0	0.9374
1y	BMI	16m	0.9996	0.0089	112.519	0	0.7776
1y	BMI	2y	0.9329	0.0142	65.878	0	0.6218
1y	BMI	3y	0.8393	0.0214	39.2462	0	0.5004
1y	BMI	5y	0.7234	0.0327	22.1418	1.2514e-108	0.3654
1y	BMI	7y	0.5772	0.0351	16.445	9.1077e-61	0.2994
1y	BMI	8y	0.4689	0.0442	10.6009	2.9527e-26	0.2627
1y	Body size	10y	0.5311	0.0292	18.2155	3.891e-74	0.0188
1y	BMI	adult	0.2171	0.0235	9.2207	2.9528e-20	0.0103
16m	BMI	birth	0.2691	0.0429	6.2757	3.4809e-10	0.1771
16m	BMI	6w	0.628	0.0405	15.5207	2.513e-54	0.256
16m	BMI	3m	0.7613	0.0276	27.6007	1.0925e-167	0.4364
16m	BMI	6m	0.898	0.0187	47.9359	0	0.5561
16m	BMI	8m	0.9534	0.0118	80.7433	0	0.677
16m	BMI	1y	0.9996	0.0089	112.519	0	0.7776
16m	BMI	2y	0.9802	0.0086	114.434	0	0.8232
16m	BMI	3y	0.9155	0.0153	59.7861	0	0.6645
16m	BMI	5y	0.8158	0.0287	28.4438	5.8132e-178	0.4832
16m	BMI	7y	0.6901	0.0365	18.9037	1.0642e-79	0.3639
16m	BMI	8y	0.5926	0.0444	13.3499	1.186e-40	0.3193
16m	Body size	10y	0.6174	0.0294	20.9815	9.6728e-98	0.0106
16m	BMI	adult	0.2526	0.0269	9.3943	5.7598e-21	0.001
2y	BMI	birth	0.2368	0.0462	5.1245	2.9829e-07	0.1742
2y	BMI	6w	0.548	0.0446	12.2867	1.0675e-34	0.2202
2y	BMI	3m	0.6533	0.0336	19.4409	3.4814e-84	0.3616
2y	BMI	6m	0.8011	0.0247	32.4534	4.8515e-231	0.4445
2y	BMI	8m	0.864	0.0178	48.4894	0	0.5451
2y	BMI	1y	0.9329	0.0142	65.878	0	0.6218
2y	BMI	16m	0.9802	0.0086	114.434	0	0.8232
2y	BMI	3y	0.9698	0.0126	76.8505	0	0.7368
2y	BMI	5y	0.8707	0.0281	30.9322	4.4064e-210	0.5333
2y	BMI	7y	0.7578	0.033	22.954	1.3428e-116	0.3958
2y	BMI	8y	0.6788	0.0416	16.3184	7.3037e-60	0.3437
2y	Body size	10y	0.6814	0.0283	24.0546	7.465e-128	0.0068
2y	BMI	adult	0.2797	0.0279	10.0373	1.0453e-23	-0.0012
3y	BMI	birth	0.2395	0.0472	5.0759	3.8572e-07	0.1453
3y	BMI	6w	0.5013	0.0502	9.9918	1.6556e-23	0.195
3y	BMI	3m	0.5897	0.0401	14.6952	6.9173e-49	0.3035
3y	BMI	6m	0.7226	0.0317	22.8192	2.9562e-115	0.3679
3y	BMI	8m	0.7867	0.0255	30.8707	2.9543e-209	0.4451
3y	BMI	1y	0.8393	0.0214	39.2462	0	0.5004
3y	BMI	16m	0.9155	0.0153	59.7861	0	0.6645
3y	BMI	2y	0.9698	0.0126	76.8505	0	0.7368
3y	BMI	5y	0.915	0.0251	36.4065	3.3607e-290	0.5422
3y	BMI	7y	0.7847	0.0363	21.6222	1.1096e-103	0.4087
3y	BMI	8y	0.7158	0.0431	16.6273	4.4194e-62	0.3578
3y	Body size	10y	0.7211	0.0309	23.3007	4.3603e-120	0.0018
3y	BMI	adult	0.3069	0.03	10.214	1.7159e-24	-0.0069
5y	BMI	birth	0.2806	0.0484	5.7973	6.7388e-09	0.1159
5y	BMI	6w	0.5152	0.0467	11.0338	2.6243e-28	0.1683
5y	BMI	3m	0.5293	0.04	13.2393	5.2007e-40	0.2515
5y	BMI	6m	0.6057	0.0355	17.0636	2.7715e-65	0.294
5y	BMI	8m	0.6517	0.035	18.6309	1.8032e-77	0.3444
5y	BMI	1y	0.7234	0.0327	22.1418	1.2514e-108	0.3654
5y	BMI	16m	0.8158	0.0287	28.4438	5.8132e-178	0.4832
5y	BMI	2y	0.8707	0.0281	30.9322	4.4064e-210	0.5333
5y	BMI	3y	0.915	0.0251	36.4065	3.3607e-290	0.5422
5y	BMI	7y	0.949	0.0244	38.8769	0	0.5348
5y	BMI	8y	0.9117	0.0308	29.563	4.4644e-192	0.5072
5y	Body size	10y	0.8502	0.0306	27.8042	3.8584e-170	0.0109
5y	BMI	adult	0.4638	0.0296	15.6749	2.2458e-55	-0.0038
7y	BMI	birth	0.2134	0.0463	4.607	4.0862e-06	0.1038
7y	BMI	6w	0.4233	0.0502	8.4306	3.4396e-17	0.14
7y	BMI	3m	0.4075	0.0412	9.9007	4.1352e-23	0.2226
7y	BMI	6m	0.4649	0.0386	12.0461	2.0342e-33	0.2601
7y	BMI	8m	0.5186	0.0366	14.1574	1.6798e-45	0.2889
7y	BMI	1y	0.5772	0.0351	16.445	9.1077e-61	0.2994
7y	BMI	16m	0.6901	0.0365	18.9037	1.0642e-79	0.3639
7y	BMI	2y	0.7578	0.033	22.954	1.3428e-116	0.3958
7y	BMI	3y	0.7847	0.0363	21.6222	1.1096e-103	0.4087
7y	BMI	5y	0.949	0.0244	38.8769	0	0.5348
7y	BMI	8y	0.9856	0.0248	39.7056	0	0.5054
7y	Body size	10y	0.9061	0.029	31.2733	1.0763e-214	0.003
7y	BMI	adult	0.5737	0.0276	20.7811	6.4118e-96	-0.0039
8y	BMI	birth	0.2295	0.0483	4.7489	2.045e-06	0.0928
8y	BMI	6w	0.2968	0.0553	5.3664	8.0304e-08	0.1409
8y	BMI	3m	0.3121	0.0494	6.3118	2.7589e-10	0.2102
8y	BMI	6m	0.3653	0.0456	8.0053	1.1919e-15	0.2354
8y	BMI	8m	0.3905	0.0448	8.7249	2.665e-18	0.2621
8y	BMI	1y	0.4689	0.0442	10.6009	2.9527e-26	0.2627
8y	BMI	16m	0.5926	0.0444	13.3499	1.186e-40	0.3193
8y	BMI	2y	0.6788	0.0416	16.3184	7.3037e-60	0.3437
8y	BMI	3y	0.7158	0.0431	16.6273	4.4194e-62	0.3578
8y	BMI	5y	0.9117	0.0308	29.563	4.4644e-192	0.5072
8y	BMI	7y	0.9856	0.0248	39.7056	0	0.5054
8y	Body size	10y	0.8903	0.0317	28.0985	1.0223e-173	0.0067
8y	BMI	adult	0.5879	0.0309	19.0533	6.1663e-81	-0.0032

## Sheet: 5 ALSPAC PGS_Lead
GWAS	ALSPAC_variable	R2	beta	se	n	pvalue
MoBa_z_bmi_6w	z_bmi_birth	0.00334428	0.0651097	0.0143937	5801	6.2e-06
MoBa_z_bmi_6w	z_bmi_cif_4m	0.0403497	0.218609	0.0413489	642	1.71e-07
MoBa_z_bmi_6w	z_bmi_cif_8m	0.0413453	0.219619	0.0358287	849	1.35e-09
MoBa_z_bmi_6w	z_bmi_cif_12m	0.0517589	0.221391	0.0327673	819	2.69e-11
MoBa_z_bmi_6w	z_bmi_cif_18m	0.029911	0.169421	0.0340819	770	8.22e-07
MoBa_z_bmi_6w	z_bmi_cif_25m	0.0297754	0.16942	0.0355374	709	2.27e-06
MoBa_z_bmi_6w	z_bmi_cif_31m	0.0368269	0.184106	0.034308	728	1.08e-07
MoBa_z_bmi_6w	z_bmi_cif_37m	0.0188005	0.129756	0.0336463	725	0.00012529
MoBa_z_bmi_6w	z_bmi_cif_49m	0.0336622	0.166805	0.0317029	767	1.86e-07
MoBa_z_bmi_6w	z_bmi_cif_61m	0.0221711	0.14517	0.0353188	702	4.42e-05
MoBa_z_bmi_6w	z_bmi_7y	0.00825428	0.0943699	0.0134326	5811	2.38e-12
MoBa_z_bmi_6w	z_bmi_8y	0.00565854	0.0774447	0.0144426	4878	8.6e-08
MoBa_z_bmi_6w	z_bmi_9y	0.00502515	0.0805539	0.0149286	5568	7.1e-08
MoBa_z_bmi_6w	z_bmi_10y	0.00422954	0.0766779	0.0156921	5387	1.06e-06
MoBa_z_bmi_6w	z_bmi_11y	0.0043947	0.0799561	0.0163369	5201	1.02e-06
MoBa_z_bmi_6w	z_bmi_12y	0.00417967	0.0784075	0.0168494	4922	3.35e-06
MoBa_z_bmi_6w	z_bmi_13y	0.00406728	0.0750858	0.0169398	4567	9.53e-06
MoBa_z_bmi_6w	z_bmi_15y	0.00512028	0.0791671	0.0169808	4030	3.23e-06
MoBa_z_bmi_6w	z_bmi_17y	0.00553614	0.0881554	0.0192056	3606	4.58e-06
MoBa_z_bmi_6w	fat_perc_9y	0.00263959	0.486351	0.12486	5356	9.93e-05
MoBa_z_bmi_6w	fat_perc_11y	0.00275967	0.510135	0.130875	5130	9.83e-05
MoBa_z_bmi_6w	fat_perc_13y	0.00192412	0.47869	0.153803	4507	0.00186761
MoBa_z_bmi_6w	fat_perc_15y	0.00145947	0.456674	0.176986	3872	0.00990845
MoBa_z_bmi_6w	fat_perc_17y	0.00333534	0.685185	0.192832	3475	0.000385529
MoBa_z_bmi_3m	z_bmi_birth	0.00284842	0.0602826	0.0143824	5801	2.81e-05
MoBa_z_bmi_3m	z_bmi_cif_4m	0.0435603	0.221757	0.040357	642	5.65e-08
MoBa_z_bmi_3m	z_bmi_cif_8m	0.0510865	0.239393	0.0350484	849	1.62e-11
MoBa_z_bmi_3m	z_bmi_cif_12m	0.0631	0.239945	0.0320377	819	1.79e-13
MoBa_z_bmi_3m	z_bmi_cif_18m	0.0354782	0.179503	0.0331695	770	8.35e-08
MoBa_z_bmi_3m	z_bmi_cif_25m	0.0333415	0.175405	0.0347899	709	5.87e-07
MoBa_z_bmi_3m	z_bmi_cif_31m	0.0338681	0.172529	0.0335243	728	3.42e-07
MoBa_z_bmi_3m	z_bmi_cif_37m	0.0175616	0.122606	0.032836	725	0.000203378
MoBa_z_bmi_3m	z_bmi_cif_49m	0.0274882	0.147945	0.0310854	767	2.32e-06
MoBa_z_bmi_3m	z_bmi_cif_61m	0.0167918	0.124409	0.0345419	702	0.000338531
MoBa_z_bmi_3m	z_bmi_7y	0.0110128	0.108674	0.0134076	5811	6.36e-16
MoBa_z_bmi_3m	z_bmi_8y	0.00774903	0.0901702	0.0144227	4878	4.4e-10
MoBa_z_bmi_3m	z_bmi_9y	0.00791726	0.10018	0.0148635	5568	1.74e-11
MoBa_z_bmi_3m	z_bmi_10y	0.00680726	0.0964016	0.0156559	5387	7.92e-10
MoBa_z_bmi_3m	z_bmi_11y	0.00716751	0.101529	0.0163543	5201	5.78e-10
MoBa_z_bmi_3m	z_bmi_12y	0.00640326	0.0958517	0.0167585	4922	1.13e-08
MoBa_z_bmi_3m	z_bmi_13y	0.00684905	0.0961735	0.0168729	4567	1.27e-08
MoBa_z_bmi_3m	z_bmi_15y	0.00732736	0.0942171	0.0169933	4030	3.14e-08
MoBa_z_bmi_3m	z_bmi_17y	0.0068276	0.0973118	0.0191647	3606	4.01e-07
MoBa_z_bmi_3m	fat_perc_9y	0.00458979	0.630805	0.124451	5356	4.14e-07
MoBa_z_bmi_3m	fat_perc_11y	0.00452008	0.645735	0.131024	5130	8.55e-07
MoBa_z_bmi_3m	fat_perc_13y	0.00295173	0.580444	0.153281	4507	0.000154585
MoBa_z_bmi_3m	fat_perc_15y	0.00230763	0.558307	0.176964	3872	0.00161777
MoBa_z_bmi_3m	fat_perc_17y	0.00407135	0.750452	0.192476	3475	9.84e-05
MoBa_z_bmi_6m	z_bmi_birth	0.00281194	0.0598712	0.0143715	5801	3.15e-05
MoBa_z_bmi_6m	z_bmi_cif_4m	0.0375658	0.206427	0.0404684	642	4.46e-07
MoBa_z_bmi_6m	z_bmi_cif_8m	0.0564414	0.250013	0.0347625	849	1.4e-12
MoBa_z_bmi_6m	z_bmi_cif_12m	0.0636538	0.239842	0.0318775	819	1.4e-13
MoBa_z_bmi_6m	z_bmi_cif_18m	0.0370086	0.18109	0.0327616	770	4.45e-08
MoBa_z_bmi_6m	z_bmi_cif_25m	0.0358352	0.18002	0.0344449	709	2.28e-07
MoBa_z_bmi_6m	z_bmi_cif_31m	0.0340313	0.171953	0.0333325	728	3.21e-07
MoBa_z_bmi_6m	z_bmi_cif_37m	0.0195164	0.128284	0.032678	725	9.47e-05
MoBa_z_bmi_6m	z_bmi_cif_49m	0.0282725	0.149142	0.0309061	767	1.68e-06
MoBa_z_bmi_6m	z_bmi_cif_61m	0.0182311	0.128968	0.034447	702	0.000196014
MoBa_z_bmi_6m	z_bmi_7y	0.0116699	0.1118	0.0134007	5811	8.97e-17
MoBa_z_bmi_6m	z_bmi_8y	0.00781216	0.0905042	0.0144185	4878	3.75e-10
MoBa_z_bmi_6m	z_bmi_9y	0.00814852	0.10147	0.0148428	5568	8.99e-12
MoBa_z_bmi_6m	z_bmi_10y	0.00665348	0.0952774	0.0156475	5387	1.21e-09
MoBa_z_bmi_6m	z_bmi_11y	0.00667927	0.0978235	0.0163117	5201	2.14e-09
MoBa_z_bmi_6m	z_bmi_12y	0.00570544	0.0904209	0.0167224	4922	6.71e-08
MoBa_z_bmi_6m	z_bmi_13y	0.00618963	0.091267	0.0168213	4567	6.07e-08
MoBa_z_bmi_6m	z_bmi_15y	0.00721945	0.0933132	0.0169524	4030	3.93e-08
MoBa_z_bmi_6m	z_bmi_17y	0.00571633	0.08923	0.0191436	3606	3.26e-06
MoBa_z_bmi_6m	fat_perc_9y	0.0047329	0.640038	0.124414	5356	2.78e-07
MoBa_z_bmi_6m	fat_perc_11y	0.00406626	0.612328	0.130724	5130	2.88e-06
MoBa_z_bmi_6m	fat_perc_13y	0.00249475	0.535313	0.152825	4507	0.000464906
MoBa_z_bmi_6m	fat_perc_15y	0.00249515	0.576742	0.176457	3872	0.00109077
MoBa_z_bmi_6m	fat_perc_17y	0.00360141	0.707804	0.192238	3475	0.000235006
MoBa_z_bmi_8m	z_bmi_birth	0.00235634	0.0551928	0.0143959	5801	0.000127446
MoBa_z_bmi_8m	z_bmi_cif_4m	0.0377587	0.206866	0.0404508	642	4.17e-07
MoBa_z_bmi_8m	z_bmi_cif_8m	0.0601089	0.257085	0.0345924	849	2.62e-13
MoBa_z_bmi_8m	z_bmi_cif_12m	0.069746	0.251083	0.0318031	819	9.34e-15
MoBa_z_bmi_8m	z_bmi_cif_18m	0.0406956	0.189844	0.0327402	770	9.77e-09
MoBa_z_bmi_8m	z_bmi_cif_25m	0.0450421	0.200512	0.03419	709	6.91e-09
MoBa_z_bmi_8m	z_bmi_cif_31m	0.0416064	0.189465	0.0332032	728	1.68e-08
MoBa_z_bmi_8m	z_bmi_cif_37m	0.0262438	0.147321	0.0325279	725	6.93e-06
MoBa_z_bmi_8m	z_bmi_cif_49m	0.0351982	0.166071	0.0308677	767	9.9e-08
MoBa_z_bmi_8m	z_bmi_cif_61m	0.0229795	0.144412	0.0345334	702	3.26e-05
MoBa_z_bmi_8m	z_bmi_7y	0.0133588	0.119632	0.0134033	5811	5.85e-19
MoBa_z_bmi_8m	z_bmi_8y	0.00914404	0.0981056	0.0144638	4878	1.32e-11
MoBa_z_bmi_8m	z_bmi_9y	0.00954205	0.109752	0.0148486	5568	1.67e-13
MoBa_z_bmi_8m	z_bmi_10y	0.00791881	0.103973	0.0156761	5387	3.62e-11
MoBa_z_bmi_8m	z_bmi_11y	0.0078984	0.106281	0.0163222	5201	8.15e-11
MoBa_z_bmi_8m	z_bmi_12y	0.00651661	0.096557	0.0167379	4922	8.47e-09
MoBa_z_bmi_8m	z_bmi_13y	0.00696181	0.0969354	0.0168716	4567	9.76e-09
MoBa_z_bmi_8m	z_bmi_15y	0.00822833	0.0994261	0.0169454	4030	4.78e-09
MoBa_z_bmi_8m	z_bmi_17y	0.00711616	0.0991493	0.0191389	3606	2.33e-07
MoBa_z_bmi_8m	fat_perc_9y	0.00592139	0.714285	0.124534	5356	1.02e-08
MoBa_z_bmi_8m	fat_perc_11y	0.00482336	0.665533	0.130877	5130	3.8e-07
MoBa_z_bmi_8m	fat_perc_13y	0.00278815	0.565554	0.153366	4507	0.000229027
MoBa_z_bmi_8m	fat_perc_15y	0.00265861	0.594251	0.176631	3872	0.000774678
MoBa_z_bmi_8m	fat_perc_17y	0.00440628	0.777865	0.192226	3475	5.31e-05
MoBa_z_bmi_1y	z_bmi_birth	0.00224678	0.0540641	0.014418	5801	0.000178731
MoBa_z_bmi_1y	z_bmi_cif_4m	0.0352551	0.202537	0.0409819	642	9.88e-07
MoBa_z_bmi_1y	z_bmi_cif_8m	0.0545886	0.246985	0.0349415	849	3.27e-12
MoBa_z_bmi_1y	z_bmi_cif_12m	0.0673203	0.249257	0.0321675	819	2.75e-14
MoBa_z_bmi_1y	z_bmi_cif_18m	0.0388698	0.187475	0.0330897	770	2.07e-08
MoBa_z_bmi_1y	z_bmi_cif_25m	0.0441607	0.199246	0.034317	709	9.66e-09
MoBa_z_bmi_1y	z_bmi_cif_31m	0.0428777	0.192889	0.0332921	728	1.03e-08
MoBa_z_bmi_1y	z_bmi_cif_37m	0.0279396	0.152664	0.0326897	725	3.59e-06
MoBa_z_bmi_1y	z_bmi_cif_49m	0.0360057	0.169026	0.031062	767	7.12e-08
MoBa_z_bmi_1y	z_bmi_cif_61m	0.0249254	0.151501	0.0348308	702	1.57e-05
MoBa_z_bmi_1y	z_bmi_7y	0.0151645	0.127572	0.0134129	5811	2.69e-21
MoBa_z_bmi_1y	z_bmi_8y	0.0109878	0.107866	0.0145205	4878	1.29e-13
MoBa_z_bmi_1y	z_bmi_9y	0.0111809	0.118822	0.0148588	5568	1.54e-15
MoBa_z_bmi_1y	z_bmi_10y	0.00934887	0.113019	0.0156988	5387	6.89e-13
MoBa_z_bmi_1y	z_bmi_11y	0.00970068	0.117615	0.0163201	5201	6.55e-13
MoBa_z_bmi_1y	z_bmi_12y	0.00781001	0.105546	0.0167437	4922	3.16e-10
MoBa_z_bmi_1y	z_bmi_13y	0.00850905	0.107208	0.0169118	4567	2.53e-10
MoBa_z_bmi_1y	z_bmi_15y	0.00959596	0.107225	0.016946	4030	2.76e-10
MoBa_z_bmi_1y	z_bmi_17y	0.00802409	0.105041	0.0191265	3606	4.25e-08
MoBa_z_bmi_1y	fat_perc_9y	0.0068755	0.769593	0.124724	5356	7.31e-10
MoBa_z_bmi_1y	fat_perc_11y	0.00596621	0.738043	0.130911	5130	1.81e-08
MoBa_z_bmi_1y	fat_perc_13y	0.00352255	0.632829	0.153806	4507	3.95e-05
MoBa_z_bmi_1y	fat_perc_15y	0.00333057	0.659429	0.176646	3872	0.000191891
MoBa_z_bmi_1y	fat_perc_17y	0.00493443	0.82034	0.192147	3475	2.01e-05
MoBa_z_bmi_16m	z_bmi_birth	0.00180077	0.0489289	0.0144514	5801	0.000714544
MoBa_z_bmi_16m	z_bmi_cif_4m	0.0330434	0.196366	0.0410302	642	2.12e-06
MoBa_z_bmi_16m	z_bmi_cif_8m	0.0522696	0.242002	0.0350143	849	9.43e-12
MoBa_z_bmi_16m	z_bmi_cif_12m	0.0700347	0.254178	0.0321248	819	8.21e-15
MoBa_z_bmi_16m	z_bmi_cif_18m	0.042726	0.196735	0.033102	770	4.24e-09
MoBa_z_bmi_16m	z_bmi_cif_25m	0.0478412	0.206784	0.0341927	709	2.38e-09
MoBa_z_bmi_16m	z_bmi_cif_31m	0.0480858	0.204621	0.033315	728	1.34e-09
MoBa_z_bmi_16m	z_bmi_cif_37m	0.0359321	0.172465	0.032602	725	1.62e-07
MoBa_z_bmi_16m	z_bmi_cif_49m	0.0410952	0.180877	0.0310989	767	8.84e-09
MoBa_z_bmi_16m	z_bmi_cif_61m	0.0283686	0.161755	0.0349119	702	4.29e-06
MoBa_z_bmi_16m	z_bmi_7y	0.016581	0.133327	0.0134026	5811	3.94e-23
MoBa_z_bmi_16m	z_bmi_8y	0.0120688	0.113361	0.0145647	4878	8.57e-15
MoBa_z_bmi_16m	z_bmi_9y	0.0127508	0.126846	0.0148564	5568	1.74e-17
MoBa_z_bmi_16m	z_bmi_10y	0.0105757	0.120143	0.0156986	5387	2.31e-14
MoBa_z_bmi_16m	z_bmi_11y	0.0113855	0.126945	0.0162688	5201	7.26e-15
MoBa_z_bmi_16m	z_bmi_12y	0.00957418	0.116698	0.0167447	4922	3.61e-12
MoBa_z_bmi_16m	z_bmi_13y	0.0102318	0.117423	0.0169132	4567	4.39e-12
MoBa_z_bmi_16m	z_bmi_15y	0.011337	0.116266	0.0169231	4030	7.39e-12
MoBa_z_bmi_16m	z_bmi_17y	0.00890343	0.110641	0.0191488	3606	8.2e-09
MoBa_z_bmi_16m	fat_perc_9y	0.0080556	0.831229	0.124623	5356	2.82e-11
MoBa_z_bmi_16m	fat_perc_11y	0.0070023	0.795847	0.13054	5130	1.16e-09
MoBa_z_bmi_16m	fat_perc_13y	0.00424887	0.692123	0.153892	4507	7.05e-06
MoBa_z_bmi_16m	fat_perc_15y	0.00402585	0.719716	0.176398	3872	4.59e-05
MoBa_z_bmi_16m	fat_perc_17y	0.00516608	0.839657	0.192427	3475	1.32e-05
MoBa_z_bmi_2y	z_bmi_birth	0.00164001	0.04683	0.014433	5801	0.00118267
MoBa_z_bmi_2y	z_bmi_cif_4m	0.0265111	0.178142	0.041466	642	2.01e-05
MoBa_z_bmi_2y	z_bmi_cif_8m	0.0475568	0.232699	0.0353461	849	8.05e-11
MoBa_z_bmi_2y	z_bmi_cif_12m	0.0697797	0.255955	0.0324119	819	9.2e-15
MoBa_z_bmi_2y	z_bmi_cif_18m	0.0423015	0.197487	0.0333973	770	5.05e-09
MoBa_z_bmi_2y	z_bmi_cif_25m	0.0490995	0.211487	0.0345093	709	1.47e-09
MoBa_z_bmi_2y	z_bmi_cif_31m	0.0536702	0.217984	0.0335435	728	1.51e-10
MoBa_z_bmi_2y	z_bmi_cif_37m	0.0408442	0.185169	0.0328206	725	2.42e-08
MoBa_z_bmi_2y	z_bmi_cif_49m	0.0446392	0.189861	0.0313014	767	2.07e-09
MoBa_z_bmi_2y	z_bmi_cif_61m	0.0341922	0.178744	0.0351785	702	4.82e-07
MoBa_z_bmi_2y	z_bmi_7y	0.0192652	0.143934	0.0134144	5811	1.31e-26
MoBa_z_bmi_2y	z_bmi_8y	0.0154737	0.128706	0.0146058	4878	1.68e-18
MoBa_z_bmi_2y	z_bmi_9y	0.0161628	0.142711	0.0148419	5568	1.01e-21
MoBa_z_bmi_2y	z_bmi_10y	0.0132121	0.134255	0.0157012	5387	1.58e-17
MoBa_z_bmi_2y	z_bmi_11y	0.014001	0.140859	0.0162825	5201	6.72e-18
MoBa_z_bmi_2y	z_bmi_12y	0.0122804	0.132108	0.016753	4922	3.83e-15
MoBa_z_bmi_2y	z_bmi_13y	0.0133222	0.133747	0.0168976	4567	3.08e-15
MoBa_z_bmi_2y	z_bmi_15y	0.0138444	0.128191	0.0168962	4030	4.04e-14
MoBa_z_bmi_2y	z_bmi_17y	0.0108653	0.121999	0.0191468	3606	2.1e-10
MoBa_z_bmi_2y	fat_perc_9y	0.0103656	0.940376	0.124458	5356	4.87e-14
MoBa_z_bmi_2y	fat_perc_11y	0.0088924	0.896233	0.130703	5130	7.86e-12
MoBa_z_bmi_2y	fat_perc_13y	0.00562227	0.791923	0.153903	4507	2.78e-07
MoBa_z_bmi_2y	fat_perc_15y	0.0052454	0.815705	0.176281	3872	3.83e-06
MoBa_z_bmi_2y	fat_perc_17y	0.00682752	0.959742	0.192404	3475	6.39e-07
MoBa_z_bmi_3y	z_bmi_birth	0.00109963	0.0391756	0.014416	5801	0.00659692
MoBa_z_bmi_3y	z_bmi_cif_4m	0.027051	0.178625	0.0411728	642	1.67e-05
MoBa_z_bmi_3y	z_bmi_cif_8m	0.0478494	0.231198	0.0350077	849	7.05e-11
MoBa_z_bmi_3y	z_bmi_cif_12m	0.0693308	0.252071	0.0320293	819	1.12e-14
MoBa_z_bmi_3y	z_bmi_cif_18m	0.0453971	0.202114	0.0329741	770	1.41e-09
MoBa_z_bmi_3y	z_bmi_cif_25m	0.0476252	0.205352	0.0340345	709	2.59e-09
MoBa_z_bmi_3y	z_bmi_cif_31m	0.0560237	0.220897	0.0332462	728	5.98e-11
MoBa_z_bmi_3y	z_bmi_cif_37m	0.0420391	0.186337	0.0325497	725	1.52e-08
MoBa_z_bmi_3y	z_bmi_cif_49m	0.0462513	0.19141	0.0309912	767	1.07e-09
MoBa_z_bmi_3y	z_bmi_cif_61m	0.0394552	0.189742	0.0347614	702	6.68e-08
MoBa_z_bmi_3y	z_bmi_7y	0.0208333	0.149946	0.0134322	5811	1.21e-28
MoBa_z_bmi_3y	z_bmi_8y	0.0180673	0.138461	0.0145358	4878	2.51e-21
MoBa_z_bmi_3y	z_bmi_9y	0.0188393	0.153763	0.0148033	5568	4.8e-25
MoBa_z_bmi_3y	z_bmi_10y	0.0155911	0.145588	0.0156715	5387	2.19e-20
MoBa_z_bmi_3y	z_bmi_11y	0.0161028	0.151261	0.016301	5201	2.45e-20
MoBa_z_bmi_3y	z_bmi_12y	0.014015	0.140819	0.0167183	4922	4.76e-17
MoBa_z_bmi_3y	z_bmi_13y	0.0158868	0.145792	0.0168673	4567	7.44e-18
MoBa_z_bmi_3y	z_bmi_15y	0.0158951	0.136912	0.016843	4030	5.72e-16
MoBa_z_bmi_3y	z_bmi_17y	0.0122744	0.129653	0.0191581	3606	1.52e-11
MoBa_z_bmi_3y	fat_perc_9y	0.013022	1.05105	0.124167	5356	3.28e-17
MoBa_z_bmi_3y	fat_perc_11y	0.0109568	0.99511	0.130867	5130	3.4e-14
MoBa_z_bmi_3y	fat_perc_13y	0.00701533	0.880449	0.153652	4507	1.07e-08
MoBa_z_bmi_3y	fat_perc_15y	0.00609352	0.874547	0.175852	3872	6.87e-07
MoBa_z_bmi_3y	fat_perc_17y	0.00719626	0.984229	0.192355	3475	3.28e-07
MoBa_z_bmi_5y	z_bmi_birth	0.00106948	0.0385598	0.0143608	5801	0.00727212
MoBa_z_bmi_5y	z_bmi_cif_4m	0.01072	0.116938	0.0414841	642	0.00496849
MoBa_z_bmi_5y	z_bmi_cif_8m	0.0285453	0.181273	0.0356069	849	4.39e-07
MoBa_z_bmi_5y	z_bmi_cif_12m	0.0530735	0.223746	0.0326899	819	1.51e-11
MoBa_z_bmi_5y	z_bmi_cif_18m	0.0361878	0.18326	0.0335295	770	6.24e-08
MoBa_z_bmi_5y	z_bmi_cif_25m	0.0395184	0.187941	0.0342389	709	5.63e-08
MoBa_z_bmi_5y	z_bmi_cif_31m	0.0524939	0.215259	0.0335047	728	2.39e-10
MoBa_z_bmi_5y	z_bmi_cif_37m	0.0489436	0.201513	0.0325789	725	1.04e-09
MoBa_z_bmi_5y	z_bmi_cif_49m	0.044538	0.190823	0.0314963	767	2.15e-09
MoBa_z_bmi_5y	z_bmi_cif_61m	0.0461675	0.209176	0.0353927	702	5.34e-09
MoBa_z_bmi_5y	z_bmi_7y	0.0277204	0.172687	0.0133771	5811	1.31e-37
MoBa_z_bmi_5y	z_bmi_8y	0.0274155	0.168938	0.0143563	4878	1.53e-31
MoBa_z_bmi_5y	z_bmi_9y	0.0296782	0.192688	0.0147236	5568	1.44e-38
MoBa_z_bmi_5y	z_bmi_10y	0.0263647	0.188867	0.0155857	5387	2.3e-33
MoBa_z_bmi_5y	z_bmi_11y	0.0260017	0.191811	0.0162215	5201	7.44e-32
MoBa_z_bmi_5y	z_bmi_12y	0.0236683	0.182229	0.0166148	4922	1.14e-27
MoBa_z_bmi_5y	z_bmi_13y	0.0233584	0.175949	0.0167605	4567	1.72e-25
MoBa_z_bmi_5y	z_bmi_15y	0.0208123	0.156179	0.0167794	4030	2.09e-20
MoBa_z_bmi_5y	z_bmi_17y	0.0180458	0.156774	0.0191172	3606	3.29e-16
MoBa_z_bmi_5y	fat_perc_9y	0.02175	1.3543	0.123599	5356	1.2e-27
MoBa_z_bmi_5y	fat_perc_11y	0.0192787	1.31597	0.130412	5130	1.01e-23
MoBa_z_bmi_5y	fat_perc_13y	0.0113827	1.11342	0.153112	4507	4.16e-13
MoBa_z_bmi_5y	fat_perc_15y	0.00961767	1.0907	0.175573	3872	5.78e-10
MoBa_z_bmi_5y	fat_perc_17y	0.0124489	1.28339	0.191758	3475	2.54e-11
MoBa_z_bmi_7y	z_bmi_birth	0.000340593	0.0248087	0.0143807	5801	0.0845553
MoBa_z_bmi_7y	z_bmi_cif_4m	0.000719536	0.0502826	0.041592	642	0.227129
MoBa_z_bmi_7y	z_bmi_cif_8m	0.0122854	0.122141	0.0359431	849	0.000710037
MoBa_z_bmi_7y	z_bmi_cif_12m	0.0280779	0.164729	0.0331914	819	8.45e-07
MoBa_z_bmi_7y	z_bmi_cif_18m	0.0189924	0.134463	0.033734	770	7.36e-05
MoBa_z_bmi_7y	z_bmi_cif_25m	0.0254255	0.153679	0.0348273	709	1.18e-05
MoBa_z_bmi_7y	z_bmi_cif_31m	0.0391865	0.187761	0.0339146	728	4.32e-08
MoBa_z_bmi_7y	z_bmi_cif_37m	0.0402527	0.182863	0.0326513	725	3.04e-08
MoBa_z_bmi_7y	z_bmi_cif_49m	0.0343627	0.168772	0.0317487	767	1.39e-07
MoBa_z_bmi_7y	z_bmi_cif_61m	0.0373497	0.187583	0.0353251	702	1.47e-07
MoBa_z_bmi_7y	z_bmi_7y	0.0281455	0.174441	0.0134082	5811	3.65e-38
MoBa_z_bmi_7y	z_bmi_8y	0.031546	0.180841	0.0143029	4878	4.45e-36
MoBa_z_bmi_7y	z_bmi_9y	0.0347061	0.208191	0.014679	5568	7.02e-45
MoBa_z_bmi_7y	z_bmi_10y	0.0323124	0.209192	0.0155557	5387	1.42e-40
MoBa_z_bmi_7y	z_bmi_11y	0.0314991	0.210431	0.0161335	5201	2.76e-38
MoBa_z_bmi_7y	z_bmi_12y	0.0308999	0.207545	0.0165163	4922	1.14e-35
MoBa_z_bmi_7y	z_bmi_13y	0.0312868	0.203321	0.0166864	4567	1.24e-33
MoBa_z_bmi_7y	z_bmi_15y	0.0240841	0.167721	0.0167362	4030	2.3e-23
MoBa_z_bmi_7y	z_bmi_17y	0.0232202	0.177676	0.0190819	3606	2.14e-20
MoBa_z_bmi_7y	fat_perc_9y	0.0229917	1.39189	0.123502	5356	3.91e-29
MoBa_z_bmi_7y	fat_perc_11y	0.0223805	1.41362	0.129905	5130	2.79e-27
MoBa_z_bmi_7y	fat_perc_13y	0.0134984	1.21093	0.152981	4507	3.08e-15
MoBa_z_bmi_7y	fat_perc_15y	0.00926508	1.06947	0.175346	3872	1.17e-09
MoBa_z_bmi_7y	fat_perc_17y	0.0124906	1.28645	0.191899	3475	2.36e-11
MoBa_z_bmi_8y	z_bmi_birth	0.000544426	0.0292773	0.0143554	5801	0.0414496
MoBa_z_bmi_8y	z_bmi_cif_4m	0.00183941	0.0607589	0.0411395	642	0.140194
MoBa_z_bmi_8y	z_bmi_cif_8m	0.0127521	0.123442	0.035704	849	0.000572633
MoBa_z_bmi_8y	z_bmi_cif_12m	0.0282758	0.164449	0.0330204	819	7.75e-07
MoBa_z_bmi_8y	z_bmi_cif_18m	0.0214201	0.142001	0.0336267	770	2.7e-05
MoBa_z_bmi_8y	z_bmi_cif_25m	0.0233284	0.14673	0.0346705	709	2.62e-05
MoBa_z_bmi_8y	z_bmi_cif_31m	0.0369333	0.181613	0.0337945	728	1.04e-07
MoBa_z_bmi_8y	z_bmi_cif_37m	0.0389867	0.179549	0.0325798	725	4.96e-08
MoBa_z_bmi_8y	z_bmi_cif_49m	0.0333743	0.165593	0.0316075	767	2.09e-07
MoBa_z_bmi_8y	z_bmi_cif_61m	0.0413842	0.197179	0.0352652	702	3.23e-08
MoBa_z_bmi_8y	z_bmi_7y	0.028663	0.175534	0.013367	5811	7.7e-39
MoBa_z_bmi_8y	z_bmi_8y	0.0319795	0.181555	0.0142592	4878	1.48e-36
MoBa_z_bmi_8y	z_bmi_9y	0.0375436	0.216372	0.0146493	5568	1.87e-48
MoBa_z_bmi_8y	z_bmi_10y	0.0346429	0.216083	0.0155026	5387	2.08e-43
MoBa_z_bmi_8y	z_bmi_11y	0.0345574	0.220837	0.0161435	5201	7.09e-42
MoBa_z_bmi_8y	z_bmi_12y	0.0325288	0.213264	0.0165298	4922	1.77e-37
MoBa_z_bmi_8y	z_bmi_13y	0.0330908	0.209296	0.0166897	4567	1.71e-35
MoBa_z_bmi_8y	z_bmi_15y	0.0268163	0.176394	0.0166662	4030	7.7e-26
MoBa_z_bmi_8y	z_bmi_17y	0.0241834	0.181841	0.0191315	3606	3.54e-21
MoBa_z_bmi_8y	fat_perc_9y	0.0271844	1.51155	0.123155	5356	3.6e-34
MoBa_z_bmi_8y	fat_perc_11y	0.0253489	1.50674	0.129971	5130	1.08e-30
MoBa_z_bmi_8y	fat_perc_13y	0.0153288	1.29143	0.153106	4507	4.41e-17
MoBa_z_bmi_8y	fat_perc_15y	0.0110637	1.16257	0.174657	3872	3.2e-11
MoBa_z_bmi_8y	fat_perc_17y	0.0127027	1.30076	0.192422	3475	1.61e-11

## Sheet: 6 ALSPAC PGS_GW
GWAS	ALSPAC_variable	R2	beta	se	n	pvalue
MoBa_z_bmi_6w	z_bmi_birth	0.0122024	0.121128	0.0142113	5801	1.95379e-17
MoBa_z_bmi_6w	z_bmi_cif_4m	0.0164121	0.1427	0.0417264	642	0.00066627
MoBa_z_bmi_6w	z_bmi_cif_8m	0.017025	0.145776	0.0368054	849	8.1e-05
MoBa_z_bmi_6w	z_bmi_cif_12m	0.0183639	0.135084	0.033456	819	5.91e-05
MoBa_z_bmi_6w	z_bmi_cif_18m	0.0112753	0.108039	0.0345656	770	0.00184105
MoBa_z_bmi_6w	z_bmi_cif_25m	0.0172128	0.132019	0.0360648	709	0.00027036
MoBa_z_bmi_6w	z_bmi_cif_31m	0.0225032	0.145951	0.0346557	728	2.86e-05
MoBa_z_bmi_6w	z_bmi_cif_37m	0.0262143	0.151877	0.033552	725	7.01e-06
MoBa_z_bmi_6w	z_bmi_cif_49m	0.0199015	0.131537	0.0323291	767	5.22e-05
MoBa_z_bmi_6w	z_bmi_cif_61m	0.021324	0.144227	0.0357522	702	6.08e-05
MoBa_z_bmi_6w	z_bmi_7y	0.010506	0.105575	0.0133342	5811	2.88e-15
MoBa_z_bmi_6w	z_bmi_8y	0.00504535	0.0722523	0.0142437	4878	4.07e-07
MoBa_z_bmi_6w	z_bmi_9y	0.00611185	0.0880716	0.0148373	5568	3.1e-09
MoBa_z_bmi_6w	z_bmi_10y	0.00480833	0.0809958	0.0155811	5387	2.08e-07
MoBa_z_bmi_6w	z_bmi_11y	0.00371225	0.0732787	0.0162339	5201	6.5e-06
MoBa_z_bmi_6w	z_bmi_12y	0.00299534	0.0660993	0.0166373	4922	7.2e-05
MoBa_z_bmi_6w	z_bmi_13y	0.0029021	0.0631125	0.0166957	4567	0.00015873
MoBa_z_bmi_6w	z_bmi_15y	0.00255717	0.0567272	0.0168535	4030	0.00077011
MoBa_z_bmi_6w	z_bmi_17y	0.00213385	0.0563626	0.0190989	3606	0.00318687
MoBa_z_bmi_3m	z_bmi_birth	0.0098175	0.108912	0.0142388	5801	2.3583e-14
MoBa_z_bmi_3m	z_bmi_cif_4m	0.0328256	0.192898	0.0404376	642	2.28e-06
MoBa_z_bmi_3m	z_bmi_cif_8m	0.0443788	0.224073	0.0352616	849	3.41e-10
MoBa_z_bmi_3m	z_bmi_cif_12m	0.0461008	0.210447	0.0330552	819	3.22e-10
MoBa_z_bmi_3m	z_bmi_cif_18m	0.0289558	0.164177	0.0335608	770	1.22e-06
MoBa_z_bmi_3m	z_bmi_cif_25m	0.0346253	0.182122	0.0354495	709	3.61e-07
MoBa_z_bmi_3m	z_bmi_cif_31m	0.0429767	0.197323	0.0340176	728	9.86e-09
MoBa_z_bmi_3m	z_bmi_cif_37m	0.0387458	0.181887	0.0331072	725	5.45e-08
MoBa_z_bmi_3m	z_bmi_cif_49m	0.0346807	0.171085	0.0320361	767	1.22e-07
MoBa_z_bmi_3m	z_bmi_cif_61m	0.0294488	0.164674	0.0348952	702	2.86e-06
MoBa_z_bmi_3m	z_bmi_7y	0.0185214	0.139079	0.0132222	5811	1.21e-25
MoBa_z_bmi_3m	z_bmi_8y	0.015054	0.122898	0.0141402	4878	4.82e-18
MoBa_z_bmi_3m	z_bmi_9y	0.0132587	0.128391	0.0147466	5568	4.08e-18
MoBa_z_bmi_3m	z_bmi_10y	0.0108754	0.120613	0.0155428	5387	1.01e-14
MoBa_z_bmi_3m	z_bmi_11y	0.0104919	0.1211	0.016163	5201	7.9e-14
MoBa_z_bmi_3m	z_bmi_12y	0.0101684	0.118383	0.0164878	4922	8.01e-13
MoBa_z_bmi_3m	z_bmi_13y	0.00921085	0.109383	0.0165945	4567	4.85e-11
MoBa_z_bmi_3m	z_bmi_15y	0.00586769	0.0836864	0.0168113	4030	6.69e-07
MoBa_z_bmi_3m	z_bmi_17y	0.007271	0.101052	0.0193036	3606	1.75e-07
MoBa_z_bmi_6m	z_bmi_birth	0.00780766	0.0971408	0.0142239	5801	9.39754e-12
MoBa_z_bmi_6m	z_bmi_cif_4m	0.0415995	0.212302	0.0395446	642	1.11e-07
MoBa_z_bmi_6m	z_bmi_cif_8m	0.0656363	0.265693	0.0341392	849	2.07e-14
MoBa_z_bmi_6m	z_bmi_cif_12m	0.0687045	0.248341	0.0317069	819	1.49e-14
MoBa_z_bmi_6m	z_bmi_cif_18m	0.047169	0.203872	0.032617	770	6.78e-10
MoBa_z_bmi_6m	z_bmi_cif_25m	0.0491756	0.211701	0.0345168	709	1.43e-09
MoBa_z_bmi_6m	z_bmi_cif_31m	0.0596415	0.226393	0.0329844	728	1.44e-11
MoBa_z_bmi_6m	z_bmi_cif_37m	0.0476584	0.195094	0.0319735	725	1.71e-09
MoBa_z_bmi_6m	z_bmi_cif_49m	0.0432871	0.185164	0.0310082	767	3.6e-09
MoBa_z_bmi_6m	z_bmi_cif_61m	0.0329924	0.169055	0.0338674	702	7.56e-07
MoBa_z_bmi_6m	z_bmi_7y	0.0208787	0.147509	0.0131993	5811	1.05e-28
MoBa_z_bmi_6m	z_bmi_8y	0.0185559	0.135465	0.0140314	4878	7.38e-22
MoBa_z_bmi_6m	z_bmi_9y	0.0156076	0.138158	0.014623	5568	4.96e-21
MoBa_z_bmi_6m	z_bmi_10y	0.0125609	0.129069	0.0154805	5387	9.54e-17
MoBa_z_bmi_6m	z_bmi_11y	0.0125014	0.131827	0.0161257	5201	3.69e-16
MoBa_z_bmi_6m	z_bmi_12y	0.0118076	0.127073	0.0164325	4922	1.27e-14
MoBa_z_bmi_6m	z_bmi_13y	0.00893341	0.107516	0.016559	4567	9.32e-11
MoBa_z_bmi_6m	z_bmi_15y	0.00811044	0.0983246	0.0168764	4030	6.11e-09
MoBa_z_bmi_6m	z_bmi_17y	0.00844613	0.109577	0.0194598	3606	1.93e-08
MoBa_z_bmi_8m	z_bmi_birth	0.00851262	0.10138	0.0142244	5801	1.14899e-12
MoBa_z_bmi_8m	z_bmi_cif_4m	0.0560586	0.249744	0.0399564	642	7.48e-10
MoBa_z_bmi_8m	z_bmi_cif_8m	0.102391	0.339204	0.0343118	849	6.95e-22
MoBa_z_bmi_8m	z_bmi_cif_12m	0.10887	0.316094	0.0314626	819	1.8e-22
MoBa_z_bmi_8m	z_bmi_cif_18m	0.0757124	0.261587	0.0327004	770	4.6e-15
MoBa_z_bmi_8m	z_bmi_cif_25m	0.0814292	0.277566	0.0347602	709	5.69e-15
MoBa_z_bmi_8m	z_bmi_cif_31m	0.0756647	0.256603	0.0329871	728	2.51e-14
MoBa_z_bmi_8m	z_bmi_cif_37m	0.0796862	0.254522	0.0318931	725	5.72e-15
MoBa_z_bmi_8m	z_bmi_cif_49m	0.0673957	0.231294	0.0308103	767	1.69e-13
MoBa_z_bmi_8m	z_bmi_cif_61m	0.0502224	0.210321	0.0340883	702	1.16e-09
MoBa_z_bmi_8m	z_bmi_7y	0.0248438	0.161062	0.0131938	5811	7.36e-34
MoBa_z_bmi_8m	z_bmi_8y	0.0207959	0.142926	0.0139764	4878	2.66e-24
MoBa_z_bmi_8m	z_bmi_9y	0.0198356	0.155864	0.0146199	5568	2.77e-26
MoBa_z_bmi_8m	z_bmi_10y	0.0157399	0.143762	0.0154013	5387	1.45e-20
MoBa_z_bmi_8m	z_bmi_11y	0.015623	0.147536	0.0161428	5201	8.82e-20
MoBa_z_bmi_8m	z_bmi_12y	0.0148547	0.142536	0.0164366	4922	5.69e-18
MoBa_z_bmi_8m	z_bmi_13y	0.0118938	0.123987	0.0165743	4567	8.82e-14
MoBa_z_bmi_8m	z_bmi_15y	0.0107468	0.112305	0.0167845	4030	2.52e-11
MoBa_z_bmi_8m	z_bmi_17y	0.0109046	0.123081	0.0192822	3606	1.96e-10
MoBa_z_bmi_1y	z_bmi_birth	0.00810149	0.099587	0.0143187	5801	3.91289e-12
MoBa_z_bmi_1y	z_bmi_cif_4m	0.0305642	0.189329	0.0411106	642	4.97e-06
MoBa_z_bmi_1y	z_bmi_cif_8m	0.0837652	0.31397	0.0354307	849	4.58e-18
MoBa_z_bmi_1y	z_bmi_cif_12m	0.0904882	0.294276	0.0324216	819	8.24e-19
MoBa_z_bmi_1y	z_bmi_cif_18m	0.0728164	0.260957	0.0333049	770	1.56e-14
MoBa_z_bmi_1y	z_bmi_cif_25m	0.0711931	0.263465	0.0354392	709	3.05e-13
MoBa_z_bmi_1y	z_bmi_cif_31m	0.0697037	0.249953	0.0335601	728	2.7e-13
MoBa_z_bmi_1y	z_bmi_cif_37m	0.0728824	0.247386	0.0325073	725	8.55e-14
MoBa_z_bmi_1y	z_bmi_cif_49m	0.0574355	0.217933	0.0315625	767	1.06e-11
MoBa_z_bmi_1y	z_bmi_cif_61m	0.0442837	0.205019	0.0354317	702	1.09e-08
MoBa_z_bmi_1y	z_bmi_7y	0.0336654	0.187878	0.0131732	5811	2.18e-45
MoBa_z_bmi_1y	z_bmi_8y	0.0277581	0.166245	0.0140382	4878	6.43e-32
MoBa_z_bmi_1y	z_bmi_9y	0.0263496	0.180257	0.0146372	5568	2.1e-34
MoBa_z_bmi_1y	z_bmi_10y	0.0227186	0.173192	0.0154165	5387	5.8e-29
MoBa_z_bmi_1y	z_bmi_11y	0.0209237	0.170419	0.0160938	5201	6.14e-26
MoBa_z_bmi_1y	z_bmi_12y	0.0203122	0.166696	0.0164228	4922	5.68e-24
MoBa_z_bmi_1y	z_bmi_13y	0.0189214	0.155967	0.0165268	4567	5.93e-21
MoBa_z_bmi_1y	z_bmi_15y	0.0175065	0.1419	0.0166321	4030	2.01e-17
MoBa_z_bmi_1y	z_bmi_17y	0.015357	0.144721	0.0191309	3606	4.9e-14
MoBa_z_bmi_16m	z_bmi_birth	0.00625391	0.0875242	0.0142925	5801	9.73646e-10
MoBa_z_bmi_16m	z_bmi_cif_4m	0.0277	0.177209	0.0403777	642	1.33e-05
MoBa_z_bmi_16m	z_bmi_cif_8m	0.0738256	0.290394	0.0350626	849	4.7e-16
MoBa_z_bmi_16m	z_bmi_cif_12m	0.09246	0.291329	0.0317229	819	3.36e-19
MoBa_z_bmi_16m	z_bmi_cif_18m	0.0778495	0.264438	0.0325698	770	1.87e-15
MoBa_z_bmi_16m	z_bmi_cif_25m	0.0719716	0.261559	0.0349811	709	2.25e-13
MoBa_z_bmi_16m	z_bmi_cif_31m	0.0613654	0.229755	0.0329809	728	7.3e-12
MoBa_z_bmi_16m	z_bmi_cif_37m	0.0711458	0.24423	0.0325049	725	1.7e-13
MoBa_z_bmi_16m	z_bmi_cif_49m	0.0566351	0.212134	0.0309472	767	1.47e-11
MoBa_z_bmi_16m	z_bmi_cif_61m	0.0477799	0.208685	0.034697	702	2.91e-09
MoBa_z_bmi_16m	z_bmi_7y	0.0351504	0.192047	0.0131692	5811	2.45e-47
MoBa_z_bmi_16m	z_bmi_8y	0.0271802	0.16441	0.0140331	4878	2.77e-31
MoBa_z_bmi_16m	z_bmi_9y	0.0253784	0.177861	0.0147218	5568	3.44e-33
MoBa_z_bmi_16m	z_bmi_10y	0.0225429	0.173052	0.0154649	5387	9.45e-29
MoBa_z_bmi_16m	z_bmi_11y	0.0238649	0.183201	0.0161845	5201	2.31e-29
MoBa_z_bmi_16m	z_bmi_12y	0.0212509	0.171324	0.0164975	4922	5.26e-25
MoBa_z_bmi_16m	z_bmi_13y	0.0182421	0.153917	0.0166126	4567	2.93e-20
MoBa_z_bmi_16m	z_bmi_15y	0.0153764	0.13342	0.0166881	4030	1.68e-15
MoBa_z_bmi_16m	z_bmi_17y	0.0120073	0.128302	0.0191661	3606	2.51e-11
MoBa_z_bmi_2y	z_bmi_birth	0.00442555	0.0743974	0.0143759	5801	2.35381e-07
MoBa_z_bmi_2y	z_bmi_cif_4m	0.0281546	0.173641	0.0392517	642	1.14e-05
MoBa_z_bmi_2y	z_bmi_cif_8m	0.0613227	0.259956	0.0346151	849	1.5e-13
MoBa_z_bmi_2y	z_bmi_cif_12m	0.0788127	0.265349	0.0314946	819	1.61e-16
MoBa_z_bmi_2y	z_bmi_cif_18m	0.0711113	0.249447	0.0322382	770	3.19e-14
MoBa_z_bmi_2y	z_bmi_cif_25m	0.0648202	0.246224	0.0347956	709	3.57e-12
MoBa_z_bmi_2y	z_bmi_cif_31m	0.0684076	0.239703	0.032504	728	4.51e-13
MoBa_z_bmi_2y	z_bmi_cif_37m	0.0737045	0.245919	0.0321228	725	6.17e-14
MoBa_z_bmi_2y	z_bmi_cif_49m	0.0670758	0.227847	0.0304272	767	1.93e-13
MoBa_z_bmi_2y	z_bmi_cif_61m	0.0490336	0.208061	0.0341383	702	1.81e-09
MoBa_z_bmi_2y	z_bmi_7y	0.0390671	0.202451	0.0131449	5811	1.72e-52
MoBa_z_bmi_2y	z_bmi_8y	0.0343751	0.185635	0.0140481	4878	3.4e-39
MoBa_z_bmi_2y	z_bmi_9y	0.0302225	0.193464	0.0146458	5568	3e-39
MoBa_z_bmi_2y	z_bmi_10y	0.0283485	0.193454	0.0153836	5387	9.14e-36
MoBa_z_bmi_2y	z_bmi_11y	0.0268316	0.193626	0.0161147	5201	7.99e-33
MoBa_z_bmi_2y	z_bmi_12y	0.0297279	0.201441	0.0163512	4922	2.27e-34
MoBa_z_bmi_2y	z_bmi_13y	0.0257992	0.181562	0.0164434	4567	5.42e-28
MoBa_z_bmi_2y	z_bmi_15y	0.0218305	0.158521	0.016625	4030	2.51e-21
MoBa_z_bmi_2y	z_bmi_17y	0.0171628	0.153607	0.0192081	3606	1.7e-15
MoBa_z_bmi_3y	z_bmi_birth	0.00380595	0.0690306	0.0143444	5801	1.52936e-06
MoBa_z_bmi_3y	z_bmi_cif_4m	0.0229952	0.16527	0.0412059	642	6.76e-05
MoBa_z_bmi_3y	z_bmi_cif_8m	0.0496362	0.237809	0.0353369	849	3.13e-11
MoBa_z_bmi_3y	z_bmi_cif_12m	0.0586563	0.234511	0.03253	819	1.28e-12
MoBa_z_bmi_3y	z_bmi_cif_18m	0.053114	0.220073	0.0331262	770	5.8e-11
MoBa_z_bmi_3y	z_bmi_cif_25m	0.0645113	0.248452	0.0351986	709	4.02e-12
MoBa_z_bmi_3y	z_bmi_cif_31m	0.0580136	0.226276	0.0334451	728	2.74e-11
MoBa_z_bmi_3y	z_bmi_cif_37m	0.0662322	0.237952	0.0328865	725	1.19e-12
MoBa_z_bmi_3y	z_bmi_cif_49m	0.0521766	0.206849	0.031483	767	9.29e-11
MoBa_z_bmi_3y	z_bmi_cif_61m	0.0376929	0.185842	0.0348373	702	1.29e-07
MoBa_z_bmi_3y	z_bmi_7y	0.0368979	0.19647	0.0131393	5811	1.24e-49
MoBa_z_bmi_3y	z_bmi_8y	0.0313154	0.175881	0.0139631	4878	7.97e-36
MoBa_z_bmi_3y	z_bmi_9y	0.0297183	0.191772	0.0146434	5568	1.28e-38
MoBa_z_bmi_3y	z_bmi_10y	0.029315	0.197092	0.0154063	5387	6.17e-37
MoBa_z_bmi_3y	z_bmi_11y	0.0251761	0.187906	0.0161546	5201	6.84e-31
MoBa_z_bmi_3y	z_bmi_12y	0.0253104	0.186372	0.0164227	4922	1.75e-29
MoBa_z_bmi_3y	z_bmi_13y	0.020739	0.163994	0.0165913	4567	8.24e-23
MoBa_z_bmi_3y	z_bmi_15y	0.0202027	0.153327	0.0167219	4030	7.42e-20
MoBa_z_bmi_3y	z_bmi_17y	0.0161191	0.149034	0.0192304	3606	1.19e-14
MoBa_z_bmi_5y	z_bmi_birth	0.00328294	0.064165	0.0143107	5801	7.4766e-06
MoBa_z_bmi_5y	z_bmi_cif_4m	0.0117218	0.120957	0.0412393	642	0.00347651
MoBa_z_bmi_5y	z_bmi_cif_8m	0.02656	0.174454	0.0355086	849	1.08e-06
MoBa_z_bmi_5y	z_bmi_cif_12m	0.0422624	0.19793	0.0324973	819	1.73e-09
MoBa_z_bmi_5y	z_bmi_cif_18m	0.0417753	0.193092	0.0328619	770	6.27e-09
MoBa_z_bmi_5y	z_bmi_cif_25m	0.0484443	0.216414	0.0355568	709	1.89e-09
MoBa_z_bmi_5y	z_bmi_cif_31m	0.0518866	0.214372	0.0335671	728	3.03e-10
MoBa_z_bmi_5y	z_bmi_cif_37m	0.0536791	0.207983	0.0320665	725	1.63e-10
MoBa_z_bmi_5y	z_bmi_cif_49m	0.0528881	0.205051	0.0309921	767	6.92e-11
MoBa_z_bmi_5y	z_bmi_cif_61m	0.0520985	0.215967	0.0343505	702	5.69e-10
MoBa_z_bmi_5y	z_bmi_7y	0.0594586	0.250279	0.0130415	5811	1.23e-79
MoBa_z_bmi_5y	z_bmi_8y	0.0530611	0.231256	0.0139635	4878	5.61e-60
MoBa_z_bmi_5y	z_bmi_9y	0.0512587	0.251718	0.0144901	5568	7.2e-66
MoBa_z_bmi_5y	z_bmi_10y	0.0530812	0.26418	0.0151787	5387	4.75e-66
MoBa_z_bmi_5y	z_bmi_11y	0.0501139	0.263787	0.0158971	5201	2.7e-60
MoBa_z_bmi_5y	z_bmi_12y	0.0473954	0.254768	0.0162488	4922	4.2e-54
MoBa_z_bmi_5y	z_bmi_13y	0.0414905	0.23157	0.0164302	4567	3.44e-44
MoBa_z_bmi_5y	z_bmi_15y	0.0390917	0.212075	0.0165146	4030	5.05e-37
MoBa_z_bmi_5y	z_bmi_17y	0.0318625	0.20853	0.0190644	3606	2.03e-27
MoBa_z_bmi_7y	z_bmi_birth	0.00201211	0.0510958	0.0143413	5801	0.000369823
MoBa_z_bmi_7y	z_bmi_cif_4m	1.83e-05	0.041065	0.0408264	642	0.314871
MoBa_z_bmi_7y	z_bmi_cif_8m	0.0118312	0.1183	0.0354233	849	0.00087561
MoBa_z_bmi_7y	z_bmi_cif_12m	0.0268402	0.158176	0.0325871	819	1.45e-06
MoBa_z_bmi_7y	z_bmi_cif_18m	0.0278755	0.157215	0.0327454	770	1.9e-06
MoBa_z_bmi_7y	z_bmi_cif_25m	0.0372505	0.183003	0.0343436	709	1.33e-07
MoBa_z_bmi_7y	z_bmi_cif_31m	0.0401163	0.184402	0.0329166	728	3.01e-08
MoBa_z_bmi_7y	z_bmi_cif_37m	0.0426519	0.18167	0.0315029	725	1.2e-08
MoBa_z_bmi_7y	z_bmi_cif_49m	0.0346153	0.16255	0.0304665	767	1.26e-07
MoBa_z_bmi_7y	z_bmi_cif_61m	0.0448619	0.196655	0.0337632	702	8.73e-09
MoBa_z_bmi_7y	z_bmi_7y	0.0647285	0.261812	0.0130402	5811	9.64e-87
MoBa_z_bmi_7y	z_bmi_8y	0.0695455	0.262457	0.0137278	4878	1.25e-78
MoBa_z_bmi_7y	z_bmi_9y	0.072186	0.300921	0.0144426	5568	6.68e-93
MoBa_z_bmi_7y	z_bmi_10y	0.0715914	0.308391	0.0151142	5387	3.37e-89
MoBa_z_bmi_7y	z_bmi_11y	0.0685833	0.309477	0.0157951	5201	1.57e-82
MoBa_z_bmi_7y	z_bmi_12y	0.0667529	0.302093	0.0160791	4922	4.13e-76
MoBa_z_bmi_7y	z_bmi_13y	0.0631636	0.284877	0.01621	4567	5.96e-67
MoBa_z_bmi_7y	z_bmi_15y	0.0560526	0.25485	0.016442	4030	1.12e-52
MoBa_z_bmi_7y	z_bmi_17y	0.0452393	0.248239	0.0189382	3606	2.21e-38
MoBa_z_bmi_8y	z_bmi_birth	0.00153446	0.045044	0.0143061	5801	0.00164897
MoBa_z_bmi_8y	z_bmi_cif_4m	0.00106674	0.0556666	0.0428902	642	0.194794
MoBa_z_bmi_8y	z_bmi_cif_8m	0.00670207	0.0940601	0.0362799	849	0.00968886
MoBa_z_bmi_8y	z_bmi_cif_12m	0.0193917	0.138581	0.0334381	819	3.76e-05
MoBa_z_bmi_8y	z_bmi_cif_18m	0.0153339	0.121651	0.0337718	770	0.00033592
MoBa_z_bmi_8y	z_bmi_cif_25m	0.0288208	0.166131	0.0354107	709	3.26e-06
MoBa_z_bmi_8y	z_bmi_cif_31m	0.0301283	0.16664	0.0343142	728	1.47e-06
MoBa_z_bmi_8y	z_bmi_cif_37m	0.0396597	0.182146	0.0327676	725	3.82e-08
MoBa_z_bmi_8y	z_bmi_cif_49m	0.0272832	0.150869	0.0318165	767	2.53e-06
MoBa_z_bmi_8y	z_bmi_cif_61m	0.0337849	0.178404	0.0353214	702	5.62e-07
MoBa_z_bmi_8y	z_bmi_7y	0.0556941	0.243061	0.0131113	5811	1.39e-74
MoBa_z_bmi_8y	z_bmi_8y	0.0641983	0.253501	0.0138384	4878	1.52e-72
MoBa_z_bmi_8y	z_bmi_9y	0.0668565	0.288661	0.0144357	5568	5.81e-86
MoBa_z_bmi_8y	z_bmi_10y	0.0634039	0.290566	0.0151962	5387	6.62e-79
MoBa_z_bmi_8y	z_bmi_11y	0.0606479	0.293204	0.0159782	5201	6.32e-73
MoBa_z_bmi_8y	z_bmi_12y	0.0600714	0.289702	0.0163098	4922	1.82e-68
MoBa_z_bmi_8y	z_bmi_13y	0.0572076	0.272428	0.0163374	4567	1.2e-60
MoBa_z_bmi_8y	z_bmi_15y	0.0465297	0.231541	0.0164708	4030	7.41e-44
MoBa_z_bmi_8y	z_bmi_17y	0.0390786	0.230966	0.0190105	3606	2.57e-33
yengo_2018	z_bmi_birth	0.000672363	0.0319372	0.0144243	5801	0.0268593
yengo_2018	z_bmi_cif_4m	0.00258125	0.0651474	0.0399529	642	0.103466
yengo_2018	z_bmi_cif_8m	0.0129277	0.120946	0.0347605	849	0.000528164
yengo_2018	z_bmi_cif_12m	0.00972581	0.0972153	0.0323443	819	0.00273134
yengo_2018	z_bmi_cif_18m	0.00911494	0.0940605	0.0331029	770	0.00460979
yengo_2018	z_bmi_cif_25m	0.0204773	0.137367	0.0345573	709	7.76e-05
yengo_2018	z_bmi_cif_31m	0.0254411	0.14759	0.0330199	728	9.08e-06
yengo_2018	z_bmi_cif_37m	0.0290233	0.153598	0.0322803	725	2.36e-06
yengo_2018	z_bmi_cif_49m	0.0378064	0.170811	0.0306304	767	3.4e-08
yengo_2018	z_bmi_cif_61m	0.0827407	0.26209	0.0327018	702	4.63e-15
yengo_2018	z_bmi_7y	0.0988329	0.319638	0.0126526	5811	1.09e-133
yengo_2018	z_bmi_8y	0.116709	0.341219	0.0134313	4878	8.07e-134
yengo_2018	z_bmi_9y	0.131094	0.400459	0.0138097	5568	2.6e-172
yengo_2018	z_bmi_10y	0.145512	0.438178	0.0144605	5387	2.27e-186
yengo_2018	z_bmi_11y	0.153554	0.460766	0.014994	5201	1.07e-190
yengo_2018	z_bmi_12y	0.154847	0.461609	0.0153646	4922	3.19e-182
yengo_2018	z_bmi_13y	0.158951	0.449379	0.0152888	4567	4.56e-174
yengo_2018	z_bmi_15y	0.162001	0.432281	0.0154793	4030	4.89e-157
yengo_2018	z_bmi_17y	0.162442	0.463617	0.0175209	3606	3.74e-141
yengo_2018	fat_perc_9y	0.0843406	2.62161	0.117923	5356	8.28e-105
yengo_2018	fat_perc_11y	0.0963385	2.90005	0.123907	5130	3.43e-115
yengo_2018	fat_perc_13y	0.0726584	2.74913	0.146104	4507	4.29e-76
yengo_2018	fat_perc_15y	0.0622772	2.72677	0.169733	3872	2.85e-56
yengo_2018	fat_perc_17y	0.0726926	3.04942	0.184448	3475	3.68e-59

## Sheet: 7 ALSPAC gSEM PGS
GWAS	ALSPAC_variable	R2	beta	se	n	pvalue
gSEM	z_bmi_birth	0.000932351	0.0363299	0.0143464	5801	0.011357
gSEM	z_bmi_cif_4m	0.00426249	0.0810601	0.0418931	642	0.0534393
gSEM	z_bmi_cif_8m	0.00947023	0.109509	0.0362868	849	0.00262182
gSEM	z_bmi_cif_12m	0.0211998	0.143717	0.0332193	819	1.7e-05
gSEM	z_bmi_cif_18m	0.0260963	0.155177	0.0333842	770	3.94e-06
gSEM	z_bmi_cif_25m	0.03791	0.186535	0.0346998	709	1.04e-07
gSEM	z_bmi_cif_31m	0.0398049	0.187061	0.0335228	728	3.39e-08
gSEM	z_bmi_cif_37m	0.0460127	0.194004	0.0323701	725	3.24e-09
gSEM	z_bmi_7y	0.0726347	0.276067	0.0129271	5811	1.78e-97
gSEM	z_bmi_8y	0.0852557	0.289382	0.0135583	4878	1.05e-96
gSEM	z_bmi_9y	0.0918824	0.335537	0.0141254	5568	6.9e-119
gSEM	z_bmi_10y	0.0892488	0.341173	0.0148364	5387	1.06e-111
gSEM	z_bmi_11y	0.0861131	0.34289	0.0154747	5201	4.99e-104
gSEM	z_bmi_12y	0.0776815	0.322706	0.0158321	4922	9.98e-89
gSEM	z_bmi_13y	0.0786254	0.314879	0.0159314	4567	1.7e-83
gSEM	z_bmi_15y	0.0633746	0.266897	0.0161353	4030	1.63e-59
gSEM	z_bmi_17y	0.0604887	0.283185	0.018548	3606	4.81e-51
gSEM	fat_perc_9y	0.0610137	2.24602	0.120234	5356	1.72e-75
gSEM	fat_perc_11y	0.0520246	2.12345	0.126342	5130	9.49e-62
gSEM	fat_perc_13y	0.0286617	1.7202	0.148625	4507	1.5e-30
gSEM	fat_perc_15y	0.0199686	1.52964	0.171155	3872	6.06e-19
gSEM	fat_perc_17y	0.0226288	1.70612	0.189065	3475	2.94e-19
SAC10	z_bmi_birth	0.000288184	0.0235967	0.0144357	5801	0.102185
SAC10	z_bmi_cif_4m	0.00116562	0.0544829	0.0412083	642	0.186596
SAC10	z_bmi_cif_8m	0.00784235	0.0999826	0.0360245	849	0.00563477
SAC10	z_bmi_cif_12m	0.0223856	0.14771	0.0332537	819	1.01e-05
SAC10	z_bmi_cif_18m	0.0212647	0.141073	0.0335244	770	2.88e-05
SAC10	z_bmi_cif_25m	0.0246418	0.152773	0.0351531	709	1.59e-05
SAC10	z_bmi_cif_31m	0.0319045	0.17067	0.0341621	728	7.34e-07
SAC10	z_bmi_cif_37m	0.0366353	0.172649	0.0323217	725	1.24e-07
SAC10	z_bmi_7y	0.0599915	0.25221	0.0130801	5811	2.36e-80
SAC10	z_bmi_8y	0.0661708	0.256157	0.0137595	4878	8.72e-75
SAC10	z_bmi_9y	0.0745827	0.304676	0.0143679	5568	4.92e-96
SAC10	z_bmi_10y	0.0710091	0.308069	0.0151648	5387	1.83e-88
SAC10	z_bmi_11y	0.0702531	0.313621	0.0158016	5201	1.47e-84
SAC10	z_bmi_12y	0.0648402	0.2995	0.0161903	4922	6.46e-74
SAC10	z_bmi_13y	0.0647172	0.289938	0.0162859	4567	1.33e-68
SAC10	z_bmi_15y	0.0547522	0.251481	0.0164267	4030	1.82e-51
SAC10	z_bmi_17y	0.0484128	0.257828	0.0189863	3606	5.31e-41
SAC10	fat_perc_9y	0.0554066	2.15191	0.121226	5356	1.5e-68
SAC10	fat_perc_11y	0.0495799	2.0944	0.127802	5130	7.17e-59
SAC10	fat_perc_13y	0.0302995	1.79412	0.150668	4507	3.27e-32
SAC10	fat_perc_15y	0.021632	1.6206	0.174159	3872	2.18e-20
SAC10	fat_perc_17y	0.0255577	1.85316	0.193083	3475	1.51e-21
yengo_2018	z_bmi_birth	-0.000171719	-0.00093363	0.0144012	5801	0.948312
yengo_2018	z_bmi_cif_4m	-0.00123051	-0.0191944	0.0416664	642	0.645193
yengo_2018	z_bmi_cif_8m	0.00638334	0.0881318	0.0347077	849	0.0112865
yengo_2018	z_bmi_cif_12m	0.010711	0.101354	0.0322834	819	0.00175319
yengo_2018	z_bmi_cif_18m	0.0103139	0.0994082	0.0331102	770	0.00276596
yengo_2018	z_bmi_cif_25m	0.00833625	0.092646	0.0351384	709	0.00855791
yengo_2018	z_bmi_cif_31m	0.0152771	0.118454	0.0338043	728	0.00048624
yengo_2018	z_bmi_cif_37m	0.0138595	0.108435	0.032437	725	0.00087162
yengo_2018	z_bmi_7y	0.0459967	0.219068	0.0130656	5811	1.18e-61
yengo_2018	z_bmi_8y	0.053004	0.229623	0.0138728	4878	6.5e-60
yengo_2018	z_bmi_9y	0.0632394	0.278274	0.0143352	5568	2.83e-81
yengo_2018	z_bmi_10y	0.0683332	0.299281	0.0150387	5387	4.31e-85
yengo_2018	z_bmi_11y	0.0701135	0.310858	0.0156791	5201	2.17e-84
yengo_2018	z_bmi_12y	0.0691486	0.307879	0.0160808	4922	7.29e-79
yengo_2018	z_bmi_13y	0.067843	0.293095	0.0160539	4567	6.25e-72
yengo_2018	z_bmi_15y	0.066556	0.276873	0.0163071	4030	1.68e-62
yengo_2018	z_bmi_17y	0.0656857	0.295562	0.018529	3606	2.11e-55
yengo_2018	fat_perc_9y	0.043684	1.89791	0.121101	5356	3.69e-54
yengo_2018	fat_perc_11y	0.0453444	1.9876	0.127082	5130	6.7e-54
yengo_2018	fat_perc_13y	0.0322242	1.82853	0.148785	4507	3.61e-34
yengo_2018	fat_perc_15y	0.0203271	1.56115	0.173121	3872	2.96e-19
yengo_2018	fat_perc_17y	0.0272788	1.87446	0.188941	3475	6.79e-23

## Sheet: 8 gSEM signals
SNP	CHR	BP	effect_allele	other_allele	A1FREQ	BETA	SE	P	Q	Q_P	AAM_beta	AAM_P	SAC10_beta	SAC10_P	MOBA8_beta	MOBA8_P	EGG_beta	EGG_P	BMI_beta	BMI_SE	BMI_P	Excluded
rs1421085	16	53800954	C	T	0.402653	0.0722093	0.00214343	8.44e-249	1.70298	0.426778	-0.0583	1.63e-79	0.0474565	1e-247	0.0742398	2e-18	0.0677	7.82e-17	0.36711	0.00945344	2.6E-333	No
rs543874	1	177889480	G	A	0.206624	0.0732875	0.00253202	3.31e-184	0.474533	0.788781	-0.0647	1.82e-83	0.0469201	7.1e-169	0.105101	5.09e-26	0.0793	1.62e-15	0.229512	0.0114036	1.1e-90	No
rs11676272	2	25141538	G	A	0.487094	0.0544127	0.00210506	2.53e-147	11.0501	0.00398557	-0.023	2.71e-14	0.0361139	3e-152	0.0745001	3.45e-19	0.075	2.37e-21	0.156626	0.00920867	2.6e-65	No
rs10865548	2	631606	G	A	0.828741	0.0671751	0.00267345	2.54e-139	7.07579	0.0290744	-0.07	1.58e-88	0.0429692	1.8e-121	0.0706521	2.03e-10	0.1035	1.05e-24	0.266215	0.0122239	1.4e-106	No
rs62104180	2	466003	G	A	0.9499	0.112981	0.00466812	2.09e-129	3.29656	0.19238	-0.1174	2.1e-68	0.0715131	3.6e-116	0.127536	4.78e-08	0.0929	1.19e-05	0.399551	0.0211242	1.8e-81	No
rs7132908	12	50263148	A	G	0.384295	0.0480655	0.00207999	3.8e-118	0.0991986	0.951611	-0.0367	1.82e-40	0.0309524	4.1e-107	0.0706062	8.49e-17	0.0704	1.12e-18	0.146985	0.0095431	2.3e-54	No
rs7520945	1	75004943	T	C	0.43711	0.0446387	0.0019755	4.73e-113	4.60419	0.100049	-0.0507	2.16e-79	0.0280684	1.9e-88	0.0615246	2.1e-13	0.0576	6.84e-14	0.0806337	0.00930904	2e-18	No
rs12641981	4	45179883	T	C	0.435211	0.0351357	0.00193533	1.18e-73	4.56409	0.102075	-0.0379	4.02e-44	0.0218819	5.3e-55	0.0440488	2.14e-07	0.044	4.19e-08	0.142369	0.00935463	5.5e-53	No
rs148965598	16	19975731	A	G	0.861239	0.0480217	0.00279556	3.89e-66	1.62642	0.443432	-0.0468	5.2e-32	0.0302149	3.2e-51	0.0673055	3.72e-07	0.0716	4.99e-10	0.140346	0.0135402	5.9e-26	No
rs2568960	1	72812249	G	A	0.601634	0.0306474	0.00190464	2.95e-58	8.68811	0.0129838	-0.0368	2.66e-41	0.0183703	2.9e-38	0.0353423	3.3e-05	0.0336	1.79e-05	0.111833	0.00941399	1.8e-32	No
rs8030456	15	68076856	C	T	0.775469	0.0353073	0.0022416	6.77e-56	14.9331	0.000572	-0.0432	1.04e-41	0.0212449	4.9e-38	0.0247075	0.013972	0.029	0.001934	0.138957	0.0111283	3.9e-38	No
rs3798519	6	50788778	C	A	0.179813	0.0386987	0.00249068	1.94e-54	0.80808	0.667618	-0.0328	1.6e-21	0.024746	1.1e-41	0.0657311	6.26e-10	0.0692	2.3e-12	0.187624	0.0120776	3.6e-54	No
rs190572876	2	206972042	A	G	0.058718	0.0623363	0.00424825	9.54e-49	1.57072	0.455955	-0.0428	8.39e-13	0.0419259	3.5e-46	0.0536202	0.013606	0.0952	1.36e-07	0.099954	0.0196605	4.2e-07	No
rs11759084	6	100729505	C	G	0.224895	0.031862	0.00218092	2.45e-48	7.46775	0.0239001	-0.0385	1.97e-33	0.0176699	4.1e-27	0.0565274	3.51e-08	0.0251	0.005759	0.0213715	0.0110894	0.068	No
rs11671304	19	47564643	T	C	0.671432	0.0266913	0.00193007	1.7e-43	8.25114	0.0161543	-0.0347	1.26e-31	0.0148823	1.7e-24	0.0380652	1.76e-05	0.0168	0.05579	0.128195	0.0099621	1.7e-37	No
rs11030102	11	27681596	G	C	0.263095	0.0280284	0.00210862	2.57e-40	2.922	0.232004	-0.0266	2.57e-18	0.0163812	2.2e-26	0.0550466	3.32e-09	0.0528	2.16e-09	0.135136	0.0105377	1.7e-38	No
rs1379575	16	20052123	A	G	0.240559	0.0289879	0.00222171	6.56e-39	0.124328	0.939729	-0.0238	3.83e-14	0.0188405	1.8e-30	0.0429321	4.72e-06	0.0323	0.0002846	0.084559	0.0109441	4e-14	No
rs78263856	18	58042821	T	C	0.960908	0.0623531	0.00498678	7.13e-36	5.83874	0.0539676	-0.0324	2.45e-06	0.0420814	1.1e-31	0.116343	4.1e-10	0.0878	2.3e-05	0.336481	0.0241052	2.7e-44	No
rs6733172	2	142360384	T	C	0.781439	0.0266066	0.00215814	6.36e-35	12.4539	0.00197544	-0.036	1.69e-28	0.0142708	2.6e-17	0.0345415	0.000779	0.02	0.02849	0.0564742	0.0111486	3.5e-07	No
rs4735652	8	76847583	A	T	0.588861	0.0244154	0.00200066	2.97e-34	3.90282	0.142073	-0.0111	3.96e-05	0.017081	1.5e-33	0.0346776	4.32e-05	0.0199	0.01067	0.0881567	0.00943086	2.2e-20	No
rs4744246	9	96254464	G	A	0.344491	0.0243817	0.00200521	5.13e-34	0.0162102	0.991928	-0.0196	2.11e-11	0.0160335	9.8e-28	0.032706	0.000149	0.0334	4.37e-05	-0.00129301	0.00978651	0.98	No
rs879620	16	4015729	T	C	0.614764	0.0238769	0.00198067	1.83e-33	0.454161	0.796857	-0.0179	1.11e-08	0.0160657	3.5e-29	0.0339967	8.48e-05	0.0281	0.0005408	0.108695	0.00955711	6.9e-31	No
rs1987471	16	28825866	G	T	0.403009	0.0226124	0.00190289	1.45e-32	2.32576	0.312585	-0.0191	5.94e-12	0.013608	9.4e-23	0.0461905	5.45e-08	0.0306	0.0001656	0.127086	0.0094475	8.5e-42	No
rs7708584	5	153543466	A	G	0.426539	0.0221722	0.00187577	3.06e-32	1.7181	0.423565	-0.0216	1.24e-15	0.0134241	7.5e-22	0.0334145	8.37e-05	0.0385	3.98e-07	0.076924	0.00935355	9.4e-17	No
rs61978656	14	30491999	T	C	0.038615	0.0565069	0.00482091	9.93e-32	2.36686	0.306226	-0.0584	1.01e-16	0.0340296	2e-21	0.0759091	0.000879	0.084	6.88e-05	0.158519	0.0242057	1e-10	No
rs947088	20	17171373	T	G	0.716957	0.0227193	0.00196583	6.8e-31	12.0174	0.00245726	-0.0356	7.56e-25	0.011303	4.5e-14	0.0366536	0.0001	0.0173	0.03426	0.0585923	0.0103622	3.4e-08	No
rs1933437	13	28624294	G	A	0.373424	0.0224044	0.0019486	1.36e-30	0.149787	0.927842	-0.0178	4.4e-11	0.0141232	1.6e-23	0.033806	9e-05	0.0187	0.01496	0.06315	0.0095984	1.7e-11	No
rs7550711	1	110082886	T	C	0.026244	0.0692806	0.00606047	2.91e-30	2.92863	0.231236	-0.0416	5.93e-06	0.04794	3e-28	0.108321	1.96e-05	0.1178	6.68e-08	0.313275	0.0290005	1.3e-26	No
rs7084503	10	2666859	T	C	0.491888	0.0211195	0.00187498	1.98e-29	3.37538	0.184946	-0.0153	8.16e-09	0.0130911	1.4e-21	0.0465301	3.07e-08	0.0171	0.02651	0.0366908	0.00932044	8.8e-05	No
rs17564430	11	115043574	T	G	0.742835	0.0226612	0.00201739	2.81e-29	19.0823	7.18e-05	-0.0331	2.36e-27	0.0118161	1e-13	0.0174585	0.0575586	0.0405	3.23e-06	0.0573785	0.0106189	3.7e-08	No
rs4858934	3	88224304	C	T	0.884686	0.0311185	0.0027914	7.32e-29	18.4818	9.7e-05	-0.0449	3.79e-26	0.0166273	3.6e-14	0.0209087	0.12416	0.0275	0.02594	0.111763	0.014465	5.5e-15	No
rs376253	6	29914533	A	G	0.261226	0.0232917	0.00214881	2.24e-27	6.00598	0.0496383	-0.0247	1.99e-13	0.014944	2.5e-21	0.0114726	0.250409	NA	NA	0.0789215	0.0105564	5.1e-14	No
rs9645613	11	28559464	G	A	0.503285	0.0196249	0.00181303	2.64e-27	4.54111	0.103255	-0.022	2.48e-16	0.0110514	1.5e-15	0.0324286	0.000104	0.0231	0.002102	0.0156103	0.00929826	0.054	No
rs707930	6	31741659	C	T	0.526708	0.0197299	0.00182865	3.87e-27	4.53038	0.10381	-0.0222	2.32e-16	0.0114661	1.2e-16	0.0246541	0.0031199	NA	NA	0.0388442	0.00928063	2.6e-05	No
rs1475397	1	65983158	T	C	0.2546	0.0232009	0.00215501	4.98e-27	0.417862	0.811451	-0.02	7.15e-11	0.014548	1.5e-20	0.0298687	0.00246814	0.0272	0.002253	0.0392135	0.0106098	0.00015	No
rs12429545	13	54102206	A	G	0.128967	0.0299287	0.00280763	1.57e-26	2.56213	0.277742	-0.0276	1.57e-11	0.0195565	5.8e-21	0.0240602	0.0495827	0.0771	1.58e-11	0.139105	0.0139828	8.7e-23	No
rs815715	3	61264084	C	G	0.573778	0.0196719	0.00186868	6.48e-26	1.84041	0.398438	-0.0194	7.61e-13	0.0120629	1.1e-17	0.0253511	0.00247725	0.026	0.0006905	0.0805512	0.00938598	8.5e-18	No
rs823154	1	205762406	C	T	0.600908	0.0188146	0.0018194	4.59e-25	8.58807	0.0136498	-0.0238	2.74e-18	0.00981047	4.3e-12	0.030941	0.000293	0.0288	0.0001632	0.0315989	0.00943622	0.0012	No
rs1333010	13	66205228	G	A	0.391029	0.01966	0.00190132	4.63e-25	0.981586	0.612141	-0.0186	2.89e-11	0.0120689	1.2e-17	0.0273997	0.00137835	0.0268	0.0008238	0.0548672	0.00953162	1e-08	No
rs6565175	16	30144379	C	G	0.603144	0.0185246	0.0017956	5.93e-25	12.7547	0.00169962	-0.0263	4.63e-21	0.00883064	1.4e-10	0.0287917	0.000636	0.0353	1.13e-05	0.104683	0.00950571	1.3e-29	No
rs12140153	1	62579891	G	T	0.90464	0.0331367	0.00321208	5.95e-25	0.0453496	0.97758	-0.0258	1.16e-07	0.0222037	1.6e-20	0.0433462	0.000713	0.0282	0.06061	0.163286	0.0161098	3.1e-24	No
rs11571404	12	1041450	T	C	0.204646	0.0234676	0.00228269	8.61e-25	2.13586	0.343719	-0.0241	1.34e-12	0.0142072	4.5e-16	0.0349214	0.000869	0.028	0.004568	0.109508	0.011541	4.8e-22	No
rs16996644	20	15813475	G	C	0.127863	0.0288296	0.00280965	1.06e-24	0.291339	0.864444	-0.0238	4.84e-09	0.0188641	1.6e-19	0.034837	0.00312183	0.0338	0.001976	0.0824156	0.0139766	3.2e-09	No
rs982692	7	93206613	C	T	0.361334	0.0201922	0.00197246	1.35e-24	0.112869	0.945128	-0.0145	2.7e-07	0.013383	2.5e-20	0.0292702	0.000883	0.0352	2.65e-05	0.0642301	0.00964888	4.5e-11	No
rs55742087	3	185830488	C	T	0.814854	0.0225372	0.00222316	3.77e-24	21.0452	2.69e-05	-0.0356	1.05e-24	0.00932422	7.8e-08	0.0378139	0.000827	0.0257	0.01188	0.142435	0.0119153	2.1e-32	No
rs4780885	16	20380004	G	C	0.501485	0.0179459	0.00177221	4.22e-24	14.884	0.000586	-0.0256	2.14e-21	0.00911092	2.8e-11	0.0163041	0.0527448	0.0313	4.55e-05	0.08045	0.00928195	5.6e-18	No
rs13211684	6	51175486	C	T	0.380308	0.0199303	0.00197035	4.73e-24	1.36479	0.505404	-0.0141	4.17e-07	0.0136228	1.2e-21	0.0166468	0.0520427	0.0151	0.0601	0.0682729	0.00957744	2.7e-13	No
rs240064	22	22281638	C	T	0.473111	0.0175415	0.00175753	1.85e-23	20.344	3.82e-05	-0.0266	1.65e-23	0.00830407	5.8e-10	0.0123502	0.143798	0.0228	0.003219	0.011695	0.00932737	0.16	No
rs643428	1	54728858	T	C	0.607961	0.0182749	0.0018482	4.7e-23	5.34525	0.0690707	-0.0215	5.52e-15	0.0100311	8.3e-13	0.0263287	0.00243332	0.007	0.3831	0.0498764	0.00950322	1.8e-07	No
rs12110721	6	55190480	A	G	0.17565	0.0252557	0.00257192	9.25e-23	7.07803	0.029042	-0.0148	5.31e-05	0.0189588	6.8e-24	0.00282668	0.80551	0.0268	0.01651	0.0677032	0.0124991	2.8e-08	No
rs12952581	17	47448346	A	G	0.362922	0.0187481	0.00191671	1.35e-22	1.63029	0.442575	-0.0183	4.09e-11	0.0112346	2.2e-15	0.0241564	0.00507657	0.0111	0.1546	0.0409607	0.0096946	2e-05	No
rs59714050	3	141267294	A	T	0.066093	0.0364441	0.00376513	3.69e-22	0.426292	0.808038	-0.0326	6.95e-09	0.0224101	2.7e-16	0.0526179	0.00239536	0.0577	0.001345	0.156965	0.0186083	1.5e-17	No
rs12343333	9	109620811	T	C	0.700106	0.0186055	0.00193133	5.77e-22	15.2113	0.000498	-0.0266	7.31e-20	0.00929103	2.4e-10	0.0143701	0.109589	-0.0024	0.7756	0.0390481	0.010136	8.9e-05	No
rs2072858	22	40708679	T	C	0.650246	0.0190134	0.00199343	1.46e-21	0.565431	0.753734	-0.0122	1.61e-05	0.0130399	3.3e-19	0.0232149	0.00677423	0.0192	0.01287	0.0870802	0.00979569	6.8e-18	No
rs4900184	14	93900609	C	T	0.587237	0.0169482	0.00178701	2.44e-21	17.997	0.000124	-0.0255	8.19e-21	0.00807137	3.3e-09	0.0130913	0.120813	0.0183	0.01677	0.0892881	0.00945118	6.3e-22	No
rs4238585	16	20255097	T	C	0.868978	0.0261375	0.00276396	3.18e-21	0.243561	0.885343	-0.0201	5.75e-07	0.0167094	2.6e-16	0.0425041	0.000384	0.0227	0.02856	0.0858689	0.0139951	9.1e-11	No
rs2539679	2	59856713	T	C	0.187735	0.0211602	0.00224462	4.22e-21	17.895	0.00013	-0.0318	7.66e-21	0.0101418	7.8e-09	0.0173668	0.103783	-0.0093	0.3289	0.0599938	0.0118143	2.5e-07	No
rs10058350	5	43141644	C	T	0.701238	0.017435	0.00185387	5.22e-21	25.8257	2.47e-06	-0.0288	6.58e-23	0.006071	3.5e-05	0.0372963	3.84e-05	0.0189	0.02243	0.0698452	0.010126	1e-11	No
rs302719	1	8490320	T	G	0.657546	0.0169275	0.00180133	5.6e-21	27.4139	1.11e-06	-0.0296	5.65e-25	0.00676448	4.4e-06	0.0195516	0.0238024	NA	NA	-0.0205799	0.00974426	0.03	No
rs10001740	4	30866392	A	G	0.434456	0.0177089	0.00188784	6.56e-21	6.9243	0.0313623	-0.0173	1.52e-10	0.0116113	1.3e-16	0.00423638	0.613546	0.0228	0.002842	0.0499275	0.00934915	1.1e-07	No
rs9507895	13	28018237	G	C	0.723233	0.0191475	0.00204188	6.76e-21	4.25628	0.119059	-0.0215	1.77e-12	0.0110387	3.8e-13	0.0204653	0.0263961	0.0312	0.000434	0.084108	0.0104475	2.3e-15	No
rs13233916	7	138874416	C	G	0.909976	0.0302285	0.00322412	6.87e-21	4.41967	0.109719	-0.0337	1.49e-11	0.0186196	1.1e-14	0.0219025	0.131923	0.0199	0.1705	0.10907	0.0161956	3.5e-11	No
rs6994250	8	64828872	C	T	0.334154	0.0186622	0.00199557	8.62e-21	0.124592	0.939605	-0.0132	3.68e-06	0.0123314	3.7e-17	0.0269415	0.00224559	0.0248	0.001732	-0.0378107	0.00984877	0.00019	No
rs957512	9	120405705	T	C	0.671521	0.0181499	0.0019437	9.84e-21	3.67526	0.159194	-0.0196	4.25e-12	0.0109628	2.7e-13	0.0191174	0.0307206	0.0267	0.0007593	0.063176	0.00991408	5.3e-11	No
rs9291816	5	63932508	C	T	0.676079	0.0191096	0.00205099	1.19e-20	1.64134	0.440136	-0.0106	0.0002561	0.0135537	8.1e-20	0.02065	0.0210999	0.0057	0.4811	0.066649	0.00989872	2.4e-11	No
rs12457718	18	52499626	C	T	0.235133	0.0202857	0.00218295	1.5e-20	0.585316	0.746277	-0.0184	1.2e-08	0.0128926	4.1e-15	0.025413	0.0065675	0.0369	1.95e-05	0.07367	0.0109774	4.3e-12	No
rs4877599	9	83229483	T	C	0.169528	0.0212387	0.00228978	1.77e-20	28.6882	5.89e-07	-0.0366	7.09e-25	0.00906249	7.1e-07	0.0101085	0.363857	0.0072	0.4438	-0.0159347	0.0123675	0.24	No
rs4961195	8	87501554	C	A	0.332068	0.0169511	0.00183481	2.5e-20	21.0816	2.64e-05	-0.027	6.1e-22	0.0072338	5.1e-07	0.0186181	0.0339993	-0.0036	0.6599	0.0296494	0.00986254	0.0021	No
rs41310284	10	102447647	C	A	0.898213	0.0289403	0.00316727	6.4e-20	4.74741	0.0931352	-0.0227	1.39e-06	0.0206627	1.4e-18	0.00719506	0.608983	0.0219	0.1116	0.142236	0.0154427	2.5e-20	No
rs11150745	17	78757626	A	G	0.681276	0.0183575	0.00201257	7.41e-20	0.422769	0.809463	-0.0147	3.76e-07	0.0122393	4.2e-16	0.0196812	0.0255641	0.0255	0.001865	0.0997818	0.00998774	3.7e-24	No
rs460799	5	66191971	G	A	0.722057	0.0188009	0.00206188	7.63e-20	0.715822	0.699135	-0.0172	1.12e-08	0.011621	7.8e-14	0.0277501	0.00273262	0.0324	9.53e-05	0.065849	0.0103464	3.5e-11	No
rs4864201	4	130731284	T	C	0.34662	0.0172532	0.00189894	1.03e-19	10.301	0.00579655	-0.0221	5.32e-15	0.00977315	2.1e-11	0.00948232	0.285187	0.0287	0.0002189	0.0655735	0.00972149	7.5e-12	No
rs78444298	1	184672098	G	A	0.980376	0.0635433	0.00701002	1.25e-19	10.9538	0.00418224	-0.0202	0.06155	0.0437569	5.6e-19	0.147008	6.61e-07	0.0797	0.01596	-0.10421	0.0335193	0.0025	No
rs6059969	20	33245284	C	T	0.821122	0.0210014	0.00231818	1.31e-19	15.0097	0.00055	-0.0312	3.83e-18	0.00995622	2.2e-08	0.0235421	0.0389825	0.0168	0.1184	0.0332702	0.0121419	0.0066	No
rs11170468	12	39430048	A	C	0.766223	0.0193773	0.00214047	1.39e-19	2.77915	0.249182	-0.023	1.02e-10	0.0108956	1.6e-11	0.0323247	0.000733	0.0231	0.01085	0.0592149	0.0109657	4.7e-08	No
rs2275241	9	129370576	A	G	0.371828	0.0172793	0.00191035	1.5e-19	0.794211	0.672263	-0.0159	1.31e-08	0.0103872	1.9e-13	0.0271594	0.00214595	0.036	3.44e-06	0.0392534	0.0095979	2.8e-05	No
rs225882	14	30480123	T	C	0.744579	0.0187436	0.00207954	2e-19	2.15403	0.340611	-0.0192	2.47e-10	0.0105486	6.9e-12	0.0290895	0.00147187	0.0147	0.08765	0.0466074	0.0106794	8.9e-06	No
rs11881338	19	18838014	T	A	0.511652	0.015839	0.00176008	2.28e-19	15.078	0.000532	-0.0236	2.56e-18	0.00761584	4.7e-08	0.0171685	0.0407268	0.0051	0.5135	0.0858126	0.00934032	1.4e-20	No
rs1441264	13	79580919	A	G	0.591742	0.0172902	0.0019215	2.29e-19	1.35793	0.507141	-0.0155	1.2e-06	0.0118613	1e-16	0.0133688	0.118972	0.0321	3.61e-05	0.0894276	0.00966124	1e-19	No
rs13078960	3	85807590	G	T	0.200809	0.0211846	0.00236585	3.42e-19	0.448671	0.799047	-0.0156	3.78e-05	0.0147887	5.9e-17	0.0259854	0.0151831	0.0267	0.005328	0.0942838	0.0115531	3.2e-16	No
rs72819572	17	2180771	T	C	0.652471	0.0176257	0.00197026	3.69e-19	1.01527	0.601919	-0.0146	2.51e-07	0.011448	1.3e-15	0.0155853	0.0773856	0.0211	0.008618	0.0556433	0.00976099	7.5e-09	No
rs750510	3	50546340	T	C	0.850858	0.0222179	0.00248613	4.01e-19	22.2158	1.5e-05	-0.0345	8.3e-20	0.0113247	8.9e-09	0.00356127	0.766351	0.0017	0.8754	0.0552128	0.0130083	3.2e-05	No
rs1294093	6	154332947	A	G	0.695868	0.0186081	0.00208721	4.87e-19	2.05914	0.35716	-0.0102	0.0004284	0.0132394	1.1e-18	0.0161681	0.0843976	0.0186	0.02263	0.0619018	0.0100978	1.1e-09	No
rs4678416	3	138092747	G	A	0.183862	0.0213566	0.00241483	9.24e-19	4.26647	0.118454	-0.0201	2.24e-08	0.0144147	1.9e-15	0.00832214	0.434321	0.0281	0.005411	0.0655531	0.011912	2.2e-08	No
rs34671296	19	47567519	G	A	0.018574	0.0611103	0.00692498	1.1e-18	1.9702	0.373402	-0.0862	6.37e-10	0.0377915	2.3e-12	0.0917084	0.0264058	0.0962	0.02772	0.154277	0.0353895	2.4e-05	No
rs1994234	17	53229345	A	G	0.369138	0.0155092	0.00175795	1.12e-18	29.6236	3.69e-07	-0.0276	5.78e-24	0.00560147	8e-05	0.0167759	0.0486194	0.0204	0.008435	0.00628745	0.00967687	0.53	No
rs754635	3	42305131	G	C	0.886146	0.0253815	0.00288761	1.5e-18	0.70394	0.703301	-0.0235	3.34e-08	0.0157042	8.6e-13	0.0365544	0.00274082	0.0274	0.02788	0.100106	0.0145372	9.6e-13	No
rs10975933	9	6954557	C	G	0.659885	0.0166223	0.00189219	1.57e-18	5.8073	0.0548227	-0.0185	4.99e-11	0.00862002	2.9e-09	0.0366921	3.4e-05	0.0222	0.005039	0.0492903	0.00982081	5.3e-07	No
rs585557	11	65663547	G	A	0.203502	0.0200019	0.00227798	1.63e-18	5.31948	0.0699665	-0.0223	2.64e-11	0.0121615	3.1e-12	0.0142011	0.174567	0.0288	0.00387	0.0853114	0.0116205	7e-14	No
rs3818916	20	17207721	G	T	0.741312	0.0177612	0.00202621	1.86e-18	14.7673	0.000621	-0.0267	4.48e-17	0.00893653	1.2e-08	0.0122024	0.203527	0.0162	0.07539	0.0459662	0.0107853	2.6e-05	No
rs7921891	10	2083682	A	G	0.49058	0.0159894	0.00184447	4.37e-18	4.6059	0.0999635	-0.0116	1.92e-05	0.00972025	2.4e-12	0.0409616	9.41e-07	0.0076	0.329	0.0372321	0.00934986	0.00011	No
rs601338	19	49206674	G	A	0.490935	0.0156952	0.00181626	5.55e-18	8.62914	0.0133723	-0.0193	6.16e-13	0.00938861	6.3e-11	0.00823634	0.323541	0.0111	0.1483	0.010698	0.00933863	0.24	No
rs72906474	3	47817007	G	T	0.416366	0.0154151	0.00181175	1.76e-17	10.0347	0.00662191	-0.0212	1.93e-14	0.00806699	1.3e-08	0.0152137	0.0740031	0.0126	0.1213	0.0805827	0.0094802	1.4e-17	No
rs6944123	7	103128824	T	G	0.315502	0.0169681	0.00199882	2.08e-17	0.082888	0.959403	-0.0139	1.45e-06	0.0109497	3e-13	0.0234282	0.0093334	0.0191	0.01774	0.0188274	0.00997771	0.059	No
rs1336486	13	40784814	G	T	0.329256	0.0173931	0.00205146	2.28e-17	4.6782	0.0964143	-0.0089	0.00193	0.0130942	2.2e-18	0.00714935	0.415414	0.0176	0.0342	0.0693586	0.0098996	1e-12	No
rs17035311	4	106066293	C	A	0.137987	0.0210048	0.00248012	2.47e-17	26.9732	1.39e-06	-0.0365	6.36e-22	0.00818855	6.3e-05	0.0181929	0.139592	0.0016	0.8748	0.010167	0.0134591	0.46	No
rs3770657	2	67630980	G	A	0.288841	0.0170185	0.00201093	2.61e-17	4.39697	0.110971	-0.0191	1.13e-10	0.00990982	5.6e-11	0.0152469	0.0926382	0.006	0.4716	0.0111181	0.0101553	0.22	No
rs1013737	18	937050	C	G	0.494241	0.0158632	0.00187471	2.64e-17	3.0559	0.21698	-0.0091	0.0007488	0.0102956	4e-14	0.034106	4.28e-05	0.0179	0.02085	0.0336544	0.00930122	0.0002	No
rs13256357	8	9979535	T	C	0.201669	0.0198143	0.00234635	3.05e-17	0.481131	0.786183	-0.0136	5.62e-05	0.0134094	3.9e-15	0.0215237	0.033997	0.0176	0.0551	0.0423803	0.0115882	0.00026	No
rs10796828	11	69490346	G	T	0.635418	0.0165617	0.00196976	4.17e-17	1.69121	0.429297	-0.012	3.88e-05	0.0113702	1.1e-15	0.011089	0.20904	0.0094	0.2524	0.0631827	0.0096469	1.5e-10	No
rs10733682	9	129460914	A	G	0.472863	0.0156462	0.00187538	7.25e-17	0.0651159	0.967966	-0.0131	3.27e-05	0.0103154	7e-14	0.0216755	0.00978836	0.0104	0.1624	0.0640202	0.0094339	1.9e-11	No
rs78420139	14	101201687	G	A	0.944208	0.0326436	0.00391354	7.35e-17	8.89129	0.0117295	-0.0456	2.3e-13	0.0172203	2.9e-08	0.0401589	0.0287919	-0.0171	0.3594	0.0160452	0.0204175	0.49	No
rs72776467	5	77485128	C	G	0.764753	0.0180015	0.00215886	7.53e-17	3.07701	0.214701	-0.0168	2.32e-07	0.0100422	2.9e-10	0.0414766	4.82e-05	0.0314	0.0005448	0.0627696	0.0109014	3.5e-09	No
rs845204	1	7465286	A	G	0.747727	0.016941	0.00203217	7.66e-17	9.04115	0.0108828	-0.0219	9e-13	0.00808568	4.2e-07	0.0334876	0.000327	0.0221	0.01039	0.0286867	0.0106541	0.0041	No
rs887912	2	59302877	T	C	0.296796	0.0160515	0.00194981	1.84e-16	12.5221	0.00190928	-0.023	6.97e-15	0.00773904	1.2e-07	0.0138463	0.137337	-0.0072	0.4095	0.0883564	0.0100866	1.4e-18	No
rs12891481	14	78426863	T	C	0.484162	0.0143761	0.00174833	1.99e-16	19.6409	5.43e-05	-0.0237	4.68e-18	0.00653209	5e-06	0.0121309	0.148205	0.0057	0.4751	0.0125449	0.00936993	0.19	No
rs7077302	10	123676662	G	C	0.919109	0.0249836	0.00304254	2.19e-16	31.9567	1.15e-07	-0.0451	6.4e-21	0.00720053	0.0094	0.0561904	7.76e-05	0.0119	0.3867	0.0308666	0.0170368	0.077	No
rs78575685	20	18321965	G	A	0.073875	0.0276746	0.00337618	2.46e-16	11.4347	0.00328846	-0.0393	1.56e-14	0.0132197	7.3e-07	0.0376458	0.0178682	0.0233	0.1053	0.0452182	0.0178692	0.0096	No
rs2141004	2	6194359	A	C	0.737652	0.0169043	0.00206555	2.75e-16	6.76507	0.0339613	-0.013	1.65e-05	0.00957425	6.9e-10	0.0487442	1.65e-07	0.0252	0.002651	0.0641218	0.0104931	8.4e-10	No
rs17336628	8	4302335	A	G	0.091363	0.0262404	0.00320906	2.91e-16	1.33886	0.512	-0.0179	8.05e-05	0.0162215	1.8e-12	0.0522021	0.000288	0.0358	0.004408	0.0575611	0.0161054	0.00037	No
rs7824221	8	76571560	A	C	0.160856	0.0191873	0.00234822	3.06e-16	23.4406	8.13e-06	-0.0301	3.28e-16	0.00679372	0.00051	0.0535641	3.53e-06	0.0332	0.002167	0.0587454	0.0126851	4.5e-06	No
rs17006627	2	61389609	G	C	0.799586	0.0173461	0.00212755	3.55e-16	29.0248	4.98e-07	-0.0315	3.57e-21	0.00611991	0.00084	0.0239401	0.0196657	0.0217	0.02183	-0.000543533	0.0115365	0.92	No
rs1452991	6	141473363	A	G	0.372443	0.0156293	0.00191712	3.57e-16	3.50511	0.173331	-0.0152	3.96e-08	0.010182	2.6e-12	0.00803506	0.353922	0.0146	0.07101	0.0425616	0.00965111	1.7e-05	No
rs10095724	8	53739232	G	A	0.637863	0.0154268	0.00190368	5.33e-16	2.14692	0.341823	-0.0161	1.14e-08	0.00908593	1.5e-10	0.0174624	0.0425638	0.016	0.04082	0.0142633	0.00967329	0.18	No
rs17313586	8	53156824	G	C	0.830455	0.0190456	0.00235142	5.51e-16	22.8385	1.1e-05	-0.0313	2.38e-18	0.00874168	2.6e-06	0.00376377	0.757009	0.0333	0.001533	0.0369201	0.0124134	0.0038	No
rs4923595	11	29245466	G	A	0.612962	0.0153374	0.00189439	5.67e-16	0.305493	0.858347	-0.0131	1.75e-06	0.00947151	1.8e-11	0.0234464	0.00596142	0.0197	0.01044	0.0458026	0.00953993	1.7e-06	No
rs10133279	14	82702712	T	C	0.442245	0.0151099	0.00186745	5.91e-16	0.1601	0.92307	-0.0127	6.78e-06	0.00945378	6.7e-12	0.0241134	0.00509859	0.021	0.01029	0.0469288	0.00941751	3.1e-07	No
rs12899958	15	47926845	T	C	0.651371	0.0152745	0.00189015	6.42e-16	8.24772	0.0161819	-0.0195	2.4e-12	0.00835953	1.1e-08	0.0117987	0.183253	0.0172	0.03009	0.0492956	0.0097469	2.4e-07	No
rs78138943	16	67448533	G	A	0.032643	0.0439546	0.0054418	6.63e-16	16.3257	0.000285	-0.0027	0.7236	0.0319449	2.7e-17	0.0995538	1.41e-05	0.0662	0.005195	0.0626044	0.026059	0.012	No
rs13047416	21	40309436	C	G	0.623016	0.0162145	0.00200759	6.66e-16	7.87542	0.0194928	-0.0041	0.1429	0.0125576	1.4e-18	0.0127044	0.141823	0.0243	0.00213	0.0646606	0.00964884	1.1e-11	No
rs7271435	20	54429806	G	A	0.763734	0.0178592	0.00221278	6.98e-16	0.228971	0.891825	-0.012	0.0001274	0.0120258	1.2e-13	0.0225277	0.024837	0.0165	0.06011	0.0591577	0.0109562	8.9e-08	No
rs10838462	11	45416657	T	C	0.524227	0.0143079	0.00178591	1.13e-15	7.5318	0.0231468	-0.0185	4.64e-12	0.00756296	2.1e-07	0.021549	0.0100062	0.016	0.03456	0.0424097	0.00929095	3.5e-06	No
rs8061554	16	3626458	T	C	0.234683	0.0167861	0.00209744	1.21e-15	12.3557	0.00207483	-0.0245	1.49e-14	0.00774017	1.2e-06	0.0192421	0.0707815	0.0171	0.06532	0.0576222	0.0109434	4e-08	No
rs17399739	10	87490850	G	A	0.069009	0.02985	0.00373034	1.22e-15	3.80186	0.149429	-0.0217	3.11e-05	0.020999	1.1e-14	0.00678819	0.68806	0.0138	0.3406	0.143088	0.0183345	3.2e-15	No
rs3764002	12	108618630	T	C	0.262008	0.0156643	0.00196606	1.62e-15	27.1557	1.27e-06	-0.0294	4.53e-20	0.00617425	9.4e-05	0.00906581	0.346554	0.0255	0.003694	-0.0533102	0.0105445	2.4e-07	No
rs3847492	10	121585598	T	C	0.200253	0.0174179	0.00219131	1.89e-15	18.4091	0.000101	-0.0272	1.31e-16	0.0083711	2.2e-06	0.00812757	0.428425	0.0148	0.1048	0.00444808	0.0116197	0.64	No
rs13107325	4	103188709	T	C	0.074484	0.0292465	0.0036992	2.65e-15	8.85908	0.01192	-0.0086	0.1685	0.0207064	3.5e-16	0.0660645	0.00095	0.0953	3.51e-08	0.213379	0.0176585	7.7e-36	No
rs117911387	9	130446836	A	G	0.046195	0.0362679	0.00459965	3.15e-15	2.84459	0.24116	-0.0215	0.002312	0.0267639	1.6e-15	0.0178406	0.437318	0.0035	0.8812	0.0602646	0.022081	0.0058	No
rs10883553	10	102635475	A	C	0.445479	0.0138846	0.00176517	3.67e-15	12.3827	0.0020471	-0.0198	3.1e-13	0.00638246	1.7e-05	0.0288714	0.00061	0.0149	0.06182	0.0634017	0.00934497	1.7e-11	No
rs740077	5	137760083	C	A	0.202033	0.0167296	0.00212686	3.67e-15	22.3607	1.39e-05	-0.0281	4.65e-18	0.00603933	0.0005	0.0253447	0.0107932	0.0031	0.7379	0.0447669	0.0115174	0.00013	No
rs9846196	3	115104761	G	T	0.657706	0.0147437	0.0018849	5.2e-15	7.34255	0.0254441	-0.019	1.08e-11	0.00750467	1.6e-07	0.0173293	0.0456415	0.0145	0.06739	0.00782363	0.00975783	0.39	No
rs4418273	7	93046072	A	G	0.747888	0.0163123	0.00208648	5.36e-15	2.6901	0.260526	-0.0175	1.18e-08	0.00917675	9.7e-09	0.026054	0.00665028	0.022	0.01206	0.0329375	0.010707	0.0011	No
rs9299	17	46669430	T	C	0.657985	0.0151709	0.00194125	5.5e-15	3.50596	0.173257	-0.0103	0.0002671	0.00908539	1.2e-10	0.0374345	1.56e-05	0.0324	5.09e-05	0.0524051	0.00977979	1.1e-07	No
rs4805555	19	30853948	G	A	0.228672	0.0167688	0.00214851	5.96e-15	4.02116	0.133911	-0.02	8.83e-10	0.00953081	1.8e-08	0.0216856	0.0298676	0.009	0.3328	0.0135904	0.0110859	0.2	No
rs10771089	12	24588709	C	G	0.481228	0.0140959	0.00181266	7.46e-15	4.041	0.132589	-0.0162	1.22e-09	0.00792968	1.2e-08	0.0167082	0.0465897	0.007	0.363	0.0452767	0.00932038	7.4e-07	No
rs3828002	20	19702049	G	A	0.451232	0.0134969	0.00173655	7.71e-15	33.094	6.51e-08	-0.0254	6.83e-21	0.00522718	0.00013	0.000242	0.976912	0.0041	0.6036	-0.00513128	0.0094335	0.64	No
rs12713889	2	77225361	T	C	0.670123	0.0156981	0.00202048	7.88e-15	2.02115	0.364009	-0.0075	0.007908	0.0113725	2e-14	0.0203205	0.024594	0.0207	0.009302	0.0367186	0.00979751	0.00013	No
rs7531045	1	97188559	A	C	0.545148	0.0140432	0.00181297	9.49e-15	4.71262	0.0947692	-0.0169	5.04e-10	0.00763208	3e-08	0.0169448	0.042125	0.0241	0.001479	0.0482555	0.00926307	3.3e-07	No
rs9538146	13	59199461	G	A	0.496654	0.0148957	0.0019231	9.51e-15	5.72938	0.0570009	-0.007	0.008825	0.0113093	3e-16	0.003487	0.678027	0.0126	0.1001	0.0731956	0.00932072	3.6e-15	No
rs12514158	5	95857763	C	T	0.393424	0.0141323	0.00182551	9.82e-15	6.3183	0.0424617	-0.0166	1.11e-09	0.00718263	7.3e-07	0.0309155	0.00026	0.0197	0.01055	0.0677718	0.00947739	5.2e-13	No
rs29940	19	34310034	A	G	0.673398	0.0145946	0.00188849	1.09e-14	21.1189	2.59e-05	-0.0232	2.92e-16	0.00730721	1.7e-06	0.000774	0.930885	0.028	0.0004592	0.0765807	0.00993963	5e-14	No
rs9462881	6	43221909	C	T	0.344929	0.0145781	0.00189111	1.27e-14	6.1444	0.0463191	-0.0183	8.65e-11	0.00761344	1.2e-07	0.0177699	0.0430259	0.0217	0.009196	0.0195437	0.00975045	0.042	No
rs7952745	12	98531463	T	G	0.432835	0.0142167	0.00184571	1.33e-14	1.30177	0.521584	-0.0141	2.11e-07	0.00874606	1.5e-09	0.0201281	0.0167121	0.0153	0.04588	0.0244456	0.00940479	0.012	No
rs4504541	7	24289438	A	C	0.297769	0.0158256	0.00206161	1.64e-14	0.802345	0.669535	-0.0093	0.001541	0.0113602	3.2e-13	0.0201237	0.02922	0.0135	0.1016	0.0354946	0.010146	0.00088	No
rs7619139	3	25110415	A	T	0.589039	0.014622	0.00190672	1.74e-14	0.909251	0.634686	-0.0088	0.001567	0.00992087	1.5e-12	0.0238606	0.00514612	0.0041	0.6054	0.0738296	0.00941505	2e-15	No
rs56920675	7	130408525	G	A	0.961865	0.0358525	0.0046793	1.83e-14	15.5704	0.000416	-0.0581	7.81e-15	0.015807	9.7e-06	0.0392599	0.107497	0.0491	0.01566	0.111067	0.0242702	3.4e-06	No
rs7159565	14	79891894	C	T	0.635986	0.0149079	0.00195803	2.66e-14	0.915703	0.632641	-0.0087	0.002093	0.0104952	3.8e-13	0.0186744	0.0307277	0.0143	0.06775	0.0854066	0.00973123	1.3e-18	No
rs2053682	5	170599327	A	C	0.682779	0.0148552	0.00195514	3.01e-14	2.50488	0.285806	-0.016	2.81e-08	0.00850557	6e-09	0.0175727	0.0482103	0.0235	0.003536	0.0830613	0.00999922	1.2e-16	No
rs11733954	4	32226664	A	G	0.342401	0.0144229	0.0019024	3.42e-14	3.98064	0.136652	-0.0167	3.28e-09	0.00802956	9.5e-08	0.0220752	0.0129006	0.0202	0.01191	0.0406837	0.00977877	5.5e-05	No
rs2694977	12	20007966	G	A	0.697033	0.0150268	0.00198251	3.46e-14	2.50007	0.286495	-0.0162	3.05e-08	0.00869281	7.3e-09	0.018385	0.0443333	0.016	0.06511	0.0351308	0.0100915	0.00042	No
rs17391694	1	78623626	T	C	0.139044	0.0203351	0.00269086	4.12e-14	0.401773	0.818005	-0.0177	0.000132	0.0125836	8.2e-11	0.0362337	0.00345804	0.0096	0.4348	0.160784	0.0133235	2.5e-33	No
rs788860	4	82137639	T	A	0.704196	0.0158955	0.00211126	5.12e-14	6.36319	0.0415194	-0.0045	0.1242	0.0124522	4.8e-16	0.0134913	0.141011	0.0046	0.5945	0.0205886	0.0101871	0.045	No
rs6107853	20	6609877	A	G	0.440771	0.0148403	0.00197409	5.58e-14	13.2608	0.00131964	-0.0017	0.5217	0.0124924	2.7e-18	0.00378001	0.654055	0.0324	2.05e-05	0.0691884	0.00940632	9.1e-14	No
rs34153025	15	41339697	T	C	0.977575	0.0455206	0.00606954	6.39e-14	12.8009	0.00166082	-0.0706	9.79e-13	0.0200592	2.6e-05	0.0928296	0.00351982	0.0383	0.1707	0.178006	0.0316739	1.6e-08	No
rs1187345	9	87299290	G	A	0.601408	0.0138357	0.00185101	7.74e-14	7.02551	0.0298147	-0.0176	4e-10	0.00819735	2.5e-08	0.00752798	0.378315	0.0117	0.1279	0.0380653	0.00949056	2.8e-05	No
rs4808940	19	19410948	C	G	0.665425	0.0146473	0.00196213	8.33e-14	0.295764	0.862533	-0.0113	0.0001291	0.0096648	1.6e-10	0.0251892	0.00415155	0.0037	0.6569	0.0326126	0.00987176	0.0023	No
rs4630087	1	187728389	A	G	0.115669	0.0213916	0.00286835	8.8e-14	0.744785	0.689084	-0.0194	3.27e-06	0.013783	3.4e-10	0.0226439	0.0678032	0.0261	0.02049	0.051253	0.0144419	0.00028	No
rs2072445	17	47587712	T	G	0.092435	0.0232181	0.00311344	8.83e-14	5.6535	0.0592051	-0.0298	5.31e-10	0.0127282	1.4e-07	0.0245003	0.0873112	0.0235	0.1135	0.0823518	0.016056	3.4e-07	No
rs973796	4	145423968	A	C	0.616132	0.0136115	0.00183134	1.07e-13	11.0698	0.00394656	-0.0194	1.8e-12	0.00689519	1.5e-06	0.00997339	0.237717	0.0103	0.1798	-0.0179826	0.00955311	0.052	No
rs45543339	19	18503194	T	C	0.250316	0.0161529	0.00217415	1.09e-13	4.194	0.122824	-0.0123	9.51e-05	0.0118042	6.1e-13	0.00215859	0.820926	0.0188	0.04357	0.0600264	0.0108261	2.9e-08	No
rs262350	7	103420708	C	T	0.424912	0.0139634	0.00188663	1.35e-13	0.269804	0.873801	-0.0092	0.0006358	0.00907941	2.3e-11	0.0209162	0.0126882	0.0156	0.04021	0.0923254	0.0094228	2e-23	No
rs4958573	5	152091739	G	A	0.722363	0.0151555	0.00204777	1.35e-13	1.77011	0.412692	-0.0156	3.16e-07	0.00911606	3e-09	0.0158543	0.0888935	0.026	0.002104	0.0325885	0.0103439	0.0013	No
rs80355964	18	29938607	C	T	0.978946	0.0453761	0.00613888	1.45e-13	4.13985	0.126195	-0.0532	4.36e-09	0.0244926	1.1e-06	0.0814114	0.00265901	0.0526	0.0151	0.0465287	0.0325686	0.13	No
rs62425398	6	166416028	A	C	0.107497	0.0224384	0.00303972	1.56e-13	0.252835	0.881247	-0.0156	0.0009323	0.015351	9.1e-12	0.0289959	0.0329223	0.0098	0.4727	0.0842073	0.0150491	1.2e-08	No
rs7322872	13	100548329	C	T	0.210203	0.0161032	0.00218857	1.87e-13	6.48597	0.0390471	-0.0217	2.24e-10	0.0080702	1.8e-06	0.0233534	0.0221549	0.0052	0.6245	0.0512276	0.0114439	1.9e-06	No
rs1652344	18	21128857	T	C	0.501159	0.0135961	0.00184867	1.92e-13	4.26662	0.118445	-0.0082	0.002067	0.00845254	6.4e-10	0.0355598	2.1e-05	0.0193	0.0103	0.094545	0.00930811	1e-24	No
rs7037178	9	73895875	G	T	0.497183	0.0125422	0.00170792	2.08e-13	30.8871	1.96e-07	-0.024	2.09e-19	0.00374043	0.0077	0.0160365	0.0553886	0.0131	0.08251	0.058526	0.00929457	6.1e-10	No
rs3791482	2	240066870	G	A	0.891274	0.0214671	0.00293252	2.47e-13	4.81105	0.0902181	-0.0262	4.4e-09	0.0120847	5.2e-08	0.0185591	0.193135	0.0156	0.2085	0.0434878	0.0148487	0.0031	No
rs2453488	12	49255208	T	C	0.309406	0.014206	0.00194189	2.56e-13	9.04325	0.0108714	-0.0198	2.09e-11	0.00748546	1.4e-06	0.0125952	0.17867	0.0218	0.01047	0.0403871	0.0100952	3.4e-05	No
rs470198	18	74656403	T	A	0.595703	0.0133626	0.00182711	2.6e-13	5.67943	0.0584422	-0.0153	1.61e-08	0.00643788	2.2e-06	0.0301335	0.00048	0.0158	0.04013	0.00739495	0.00948186	0.36	No
rs434135	13	62866393	T	C	0.67026	0.0137623	0.00188649	2.98e-13	10.9633	0.0041624	-0.0199	2.31e-12	0.00636689	8.5e-06	0.0144288	0.107445	-0.0087	0.2874	0.0374961	0.00993276	6.9e-05	No
rs56794017	9	122655534	G	A	0.594472	0.0133928	0.00183878	3.25e-13	3.76744	0.152023	-0.0162	1.39e-08	0.00718769	3.1e-07	0.020366	0.0163005	0.0136	0.09003	0.043707	0.00947414	4.8e-06	No
rs11661531	18	45916229	A	C	0.782749	0.0163681	0.00224813	3.32e-13	0.0321654	0.984046	-0.013	0.0001056	0.0104765	3e-10	0.0246355	0.0180397	0.0212	0.02729	0.0353102	0.0114494	0.0018	No
rs13386862	2	45156324	G	A	0.6857	0.0139002	0.00191041	3.44e-13	8.04125	0.0179418	-0.0188	4.69e-11	0.00692188	5.6e-06	0.0189143	0.033686	0.0023	0.7799	0.0251624	0.00998197	0.014	No
rs12883788	14	33303540	T	C	0.460285	0.0137908	0.00189747	3.65e-13	1.77392	0.411906	-0.0069	0.01122	0.0100397	7.4e-13	0.016186	0.0529188	0.0313	0.0001066	0.0860114	0.00935391	2.4e-20	No
rs2066127	10	10026007	A	G	0.475007	0.0129929	0.00178856	3.75e-13	6.81693	0.033092	-0.0169	3.33e-10	0.00629713	3.6e-06	0.0203681	0.014952	0.0125	0.108	-0.00564796	0.00932373	0.52	No
rs77019884	2	56806378	C	T	0.751368	0.0149709	0.0020617	3.83e-13	12.9174	0.00156679	-0.0228	8.39e-13	0.00761363	5.7e-06	0.0103884	0.283576	-0.0067	0.4718	-0.0020713	0.0106645	0.87	No
rs6565588	17	79492103	G	A	0.597199	0.0130754	0.00180149	3.92e-13	27.5214	1.06e-06	-0.0228	1.26e-16	0.00597367	1.6e-05	-0.00638782	0.462877	-0.0067	0.4025	0.011938	0.00947089	0.23	No
rs28454448	4	115125392	A	G	0.279696	0.0144645	0.00199725	4.41e-13	5.07976	0.0788757	-0.0175	5.38e-09	0.00751351	1.9e-06	0.0270892	0.0046381	0.019	0.03292	0.0546023	0.0103266	1.4e-07	No
rs7426534	3	84462073	A	G	0.703291	0.0144507	0.00199722	4.64e-13	7.89573	0.0192959	-0.018	1.51e-09	0.00833823	2.7e-08	0.0033596	0.7201	0.0294	0.000423	0.0298871	0.0101267	0.0029	No
rs10875131	1	98645192	A	G	0.157773	0.017632	0.00244066	5.04e-13	4.90527	0.0860666	-0.0204	1.15e-08	0.00909694	2.7e-06	0.0348624	0.00169204	0.0028	0.7782	0.00673383	0.0126895	0.66	No
rs11789898	9	136925663	G	T	0.833811	0.0172025	0.00239071	6.22e-13	6.7253	0.0346433	-0.0223	2.69e-10	0.0093338	1.8e-06	0.019139	0.0755162	0.0138	0.1577	0.0520034	0.012492	3e-05	No
rs12107172	3	147134039	G	A	0.136071	0.0188618	0.00262296	6.43e-13	4.41318	0.110075	-0.0213	4.56e-08	0.0101195	1.4e-06	0.0399172	0.00153943	0.0017	0.8795	0.0644049	0.0135155	1.7e-06	No
rs4723263	7	33194826	C	G	0.43462	0.0132796	0.00184847	6.77e-13	2.52502	0.282943	-0.0138	3.07e-07	0.00780518	7.5e-09	0.0108838	0.195344	0.016	0.0364	0.0108903	0.00935196	0.29	No
rs62485368	7	140602060	G	A	0.92968	0.0253423	0.00353027	7.04e-13	8.8284	0.0121042	-0.0333	1.84e-10	0.0140818	2.6e-07	0.0109664	0.498034	0.045	0.00287	-0.0230229	0.0181193	0.2	No
rs2281148	20	36433288	C	T	0.251445	0.0152974	0.00213339	7.47e-13	3.55599	0.168976	-0.0152	9.77e-07	0.00994248	8.2e-10	0.00584022	0.546706	0.0064	0.4688	0.0377153	0.0107432	0.00082	No
rs6496619	15	90612683	A	G	0.23802	0.015342	0.00214377	8.27e-13	1.61313	0.44639	-0.0162	5.81e-07	0.00910292	2.6e-08	0.0194594	0.0482081	0.0248	0.009006	0.0270673	0.011052	0.013	No
rs3807563	7	50566390	C	T	0.587037	0.0127718	0.00178858	9.28e-13	15.4808	0.000435	-0.0212	8.38e-14	0.0055409	9.1e-05	0.0129251	0.130613	0.003	0.7059	0.0548469	0.00943376	6.7e-09	No
rs11856160	15	93452846	G	A	0.155407	0.0169604	0.00237546	9.34e-13	21.9436	1.72e-05	-0.0302	3.54e-16	0.00593196	0.0011	0.0177181	0.0991288	-0.0096	0.3361	0.0481224	0.0128738	0.00011	No
rs7631156	3	131751628	A	G	0.319215	0.0141958	0.00198991	9.76e-13	9.20616	0.0100209	-0.0151	2.19e-07	0.00944233	2.5e-10	-0.00553996	0.538058	0.0307	0.0001243	0.112184	0.00991478	8.4e-30	No
rs13111387	4	44495381	T	C	0.635782	0.0132266	0.00185545	1.01e-12	6.46755	0.0394085	-0.017	9.81e-10	0.00667658	5.8e-06	0.0216077	0.01226	0.0061	0.4381	0.0556494	0.00961724	1.4e-08	No
rs559231	18	39644247	T	G	0.392772	0.0135164	0.00189681	1.03e-12	4.80278	0.0905918	-0.0133	1.22e-06	0.00881828	4.1e-10	0.00148228	0.863374	0.0172	0.02832	0.0649903	0.0095559	6.5e-12	No
rs9970363	1	180575168	A	G	0.530006	0.012718	0.00180211	1.7e-12	5.09858	0.0781371	-0.0131	1.03e-06	0.00670207	2.3e-06	0.0328633	8.64e-05	0.0077	0.3067	0.0186732	0.00925493	0.05	No
rs28629903	12	122497001	T	C	0.434595	0.0132048	0.00187654	1.97e-12	2.1773	0.336671	-0.0113	3.43e-05	0.00904013	1.7e-10	0.00595589	0.477167	0.0223	0.004579	0.0591272	0.00937813	5e-10	No
rs10470001	2	495160	A	C	0.927902	0.0237198	0.00337309	2.03e-12	1.70459	0.426436	-0.0282	3.05e-08	0.0141549	5.4e-07	0.033394	0.0732318	0.0495	0.0006826	0.0932496	0.0194722	4.8e-06	No
rs9957320	18	56876430	G	T	0.833806	0.0169596	0.00241628	2.24e-12	5.63513	0.0597513	-0.0213	2.29e-09	0.00833293	3e-06	0.0235724	0.0461328	0.0188	0.05805	0.0890685	0.0124862	2.5e-13	No
rs1906251	6	98560826	A	C	0.641888	0.0134527	0.00191805	2.32e-12	1.4251	0.490392	-0.013	3.81e-06	0.00852012	5.2e-09	0.0117628	0.173601	0.0128	0.09506	-0.0252851	0.00969759	0.007	No
rs11697013	20	21502317	A	G	0.130179	0.0183556	0.00262677	2.79e-12	9.96264	0.006865	-0.026	7.14e-11	0.00799193	8e-05	0.0326748	0.0072462	-0.0012	0.9197	0.0563734	0.0138397	8.4e-05	No
rs7756992	6	20679709	A	G	0.73449	0.0135954	0.00194808	2.98e-12	24.3581	5.14e-06	-0.0263	4.01e-14	0.0040374	0.014	0.0377024	6.74e-05	0.0064	0.4515	0.0447017	0.010484	1e-05	No
rs7217460	17	65393344	G	A	0.771803	0.0152716	0.0021906	3.14e-12	1.32513	0.515528	-0.0152	3.19e-06	0.00944178	1e-08	0.014381	0.161667	0.0149	0.1182	0.0540265	0.011157	7.3e-07	No
rs16907751	8	81375457	C	T	0.904823	0.0217135	0.00311489	3.15e-12	1.57716	0.45449	-0.0241	2.65e-06	0.013564	8.9e-09	0.0184703	0.180433	0.0219	0.09286	0.0847249	0.0158373	1.5e-07	No
rs6794631	3	77543931	G	A	0.334244	0.0135485	0.00194626	3.37e-12	1.04857	0.59198	-0.0115	5.46e-05	0.00837539	3.2e-08	0.0271487	0.00259215	0.0041	0.6146	0.0479915	0.00980323	1.7e-06	No
rs276362	6	27938235	A	C	0.741017	0.0140975	0.00203076	3.87e-12	10.5239	0.00518521	-0.0204	1.94e-11	0.00688201	1.6e-05	0.0120311	0.213852	0.0089	0.2995	0.000337934	0.0105796	0.81	No
rs117455294	20	57427951	C	A	0.947933	0.0290468	0.00418836	4.06e-12	0.145572	0.9298	-0.0251	0.0001797	0.0191268	1.2e-09	0.0342498	0.0563235	0.014	0.4983	0.0388632	0.0209231	0.083	No
rs6685497	1	7031225	T	A	0.581049	0.0127946	0.00185256	4.97e-12	14.4709	0.000721	-0.0164	1.33e-09	0.00767902	2.4e-08	-0.00842279	0.322914	0.0113	0.147	0.0305543	0.00937213	0.00065	No
rs9466425	6	22645073	A	T	0.243429	0.0146161	0.00212507	6.07e-12	3.10696	0.211511	-0.0164	1.69e-07	0.00852815	1.7e-07	0.0141058	0.156117	0.0029	0.7518	0.0123976	0.0108595	0.3	No
rs2361168	2	137403333	G	A	0.505757	0.0121165	0.00176185	6.11e-12	14.7751	0.000619	-0.0195	5.58e-13	0.00522825	0.00021	0.0131552	0.116813	0.0028	0.7183	0.0277953	0.00925817	0.0046	No
rs298088	5	58994526	G	A	0.731397	0.0134286	0.00195456	6.4e-12	27.3781	1.13e-06	-0.0253	3.19e-17	0.00437447	0.0045	0.0103086	0.293598	0.0062	0.4709	0.023431	0.0104421	0.019	No
rs273496	19	18241857	T	C	0.391097	0.0122778	0.0017914	7.19e-12	19.5184	5.78e-05	-0.021	1.27e-14	0.00454352	0.00093	0.0123035	0.151891	0.002	0.7965	0.073889	0.00953417	2.6e-15	No
rs12198480	6	84342600	C	T	0.669724	0.0127188	0.00186092	8.22e-12	20.2074	4.09e-05	-0.0223	8.74e-15	0.00469787	0.0011	0.012643	0.162431	0.0182	0.0272	0.0309611	0.00986189	0.0018	No
rs17526010	5	167304609	T	C	0.72148	0.0134769	0.00197307	8.47e-12	9.7282	0.00771877	-0.019	2.93e-10	0.00603423	0.00014	0.0263739	0.00425334	0.0036	0.6749	0.0380521	0.0103907	0.00037	No
rs582204	18	66093490	T	C	0.699076	0.0137216	0.00201052	8.8e-12	0.593471	0.743241	-0.0123	3.03e-05	0.00850371	6.6e-09	0.0139702	0.125922	0.006	0.4606	0.0189911	0.0101632	0.062	No
rs1214769	6	43442651	C	A	0.304572	0.0132238	0.00194059	9.47e-12	12.3325	0.00209915	-0.0202	1.83e-11	0.00672479	1e-05	0.00511553	0.569268	0.0168	0.06022	0.0272207	0.0101537	0.011	No
rs34600710	16	51443975	T	C	0.779006	0.0151169	0.00222195	1.02e-11	0.665753	0.716859	-0.0133	3.58e-05	0.00952263	5.3e-09	0.0144306	0.157302	0.0116	0.2158	0.0194885	0.0111853	0.057	No
rs762146	21	39238132	T	C	0.721956	0.0139597	0.00205189	1.02e-11	1.03411	0.596274	-0.0119	0.0001151	0.00816268	5.4e-08	0.0283887	0.00282228	0.0196	0.0226	0.0451849	0.0104231	7.3e-06	No
rs2393717	12	121220375	C	G	0.530599	0.0119041	0.00175206	1.09e-11	20.8442	2.98e-05	-0.0208	6.73e-15	0.00446262	0.00087	0.00866467	0.298727	0.0178	0.02038	-0.00764601	0.00929879	0.42	No
rs35947256	14	101460366	T	G	0.258166	0.0140187	0.00206462	1.12e-11	4.40358	0.110605	-0.0173	3.54e-08	0.00698128	4.2e-06	0.022225	0.0264125	0.0125	0.1697	-0.0137125	0.0106281	0.21	No
rs78741089	9	131940745	G	C	0.848648	0.0171024	0.00252091	1.17e-11	11.77	0.00278082	-0.0246	2.23e-10	0.0093088	1.1e-06	0.000829	0.94222	-0.0029	0.7957	0.0432396	0.0129884	0.0017	No
rs10059709	5	58525496	C	A	0.1216	0.018842	0.00277892	1.2e-11	3.80629	0.149099	-0.0229	8.45e-08	0.0102525	2.1e-06	0.0284256	0.0336907	0.0018	0.8773	0.0237881	0.0142884	0.11	No
rs1552759	12	99640557	T	C	0.344698	0.0133298	0.00196655	1.22e-11	2.70782	0.258228	-0.0062	0.02886	0.00938008	2e-10	0.0267418	0.00220892	0.0053	0.498	0.0659558	0.00980968	3.1e-11	No
rs72693650	15	25097157	A	G	0.834625	0.0160486	0.00237215	1.33e-11	18.1389	0.000115	-0.0273	7.54e-14	0.00638689	0.0004	0.0124518	0.269732	0.007	0.5066	0.0255395	0.0126293	0.046	No
rs10260232	7	78120735	T	C	0.502654	0.0120671	0.00178464	1.36e-11	12.8382	0.0016301	-0.0181	1.22e-11	0.00597408	1.9e-05	0.00504726	0.546096	0.0063	0.4018	0.0611283	0.00932802	2.1e-11	No
rs2157295	22	42701984	G	T	0.615118	0.0127681	0.00188851	1.37e-11	2.93743	0.230221	-0.0131	2.66e-06	0.00816188	1.4e-08	0.00638491	0.448769	0.0238	0.002805	0.0326178	0.00961426	0.0012	No
rs1207791	6	8716129	A	G	0.863198	0.0181792	0.00269164	1.44e-11	2.31763	0.313858	-0.018	3.14e-06	0.0111066	1.7e-08	0.00908387	0.522533	0.0096	0.3971	0.0417888	0.0134644	0.0016	No
rs273957	7	137600690	C	T	0.385173	0.012665	0.00187652	1.49e-11	1.16179	0.559398	-0.0116	3.33e-05	0.00717868	1.8e-07	0.0247874	0.00409959	0.0205	0.01001	0.0328244	0.00952896	0.00031	No
rs13332755	16	49047944	T	G	0.30206	0.0134834	0.00199822	1.5e-11	4.32835	0.114845	-0.0143	1.05e-06	0.00845161	1.5e-08	0.00370473	0.6782	0.014	0.09036	0.0351595	0.0102212	0.00024	No
rs2855475	16	31147548	A	G	0.641323	0.0126519	0.00187923	1.67e-11	2.88353	0.23651	-0.0136	1.13e-06	0.00710227	2.6e-06	0.0249175	0.0037608	0.0069	0.3835	0.106507	0.00969071	1.8e-28	No
rs4932494	15	91975773	T	G	0.554193	0.0124253	0.00184677	1.72e-11	1.0484	0.592029	-0.0123	9.67e-06	0.00751745	3.4e-08	0.0128937	0.131473	0.004	0.6215	0.0480132	0.00946252	4e-08	No
rs3118252	9	25115154	C	G	0.584011	0.0126865	0.00188764	1.81e-11	0.111062	0.945983	-0.0089	0.001215	0.00845913	1.2e-09	0.0164428	0.0533703	0.002	0.8012	0.0113467	0.00946644	0.19	No
rs10912256	1	188120914	G	A	0.13115	0.017823	0.00265361	1.86e-11	6.35635	0.0416616	-0.0243	3.2e-09	0.0087006	8.7e-06	0.0197684	0.108539	0.0216	0.04291	0.00200826	0.0136513	0.84	No
rs1898884	15	40641447	T	C	0.797676	0.0150368	0.00224149	1.97e-11	2.99873	0.223272	-0.0176	2.6e-07	0.00813007	2.1e-06	0.0225286	0.0262694	0.0249	0.01024	-0.000109152	0.0117102	0.99	No
rs757572	14	73132029	T	C	0.408446	0.0124295	0.00185517	2.09e-11	1.67319	0.433183	-0.011	5.22e-05	0.00741221	3.2e-07	0.026996	0.00161823	0.0111	0.1701	0.0369524	0.00952408	6.1e-05	No
rs4798573	18	7585129	C	G	0.850868	0.0170235	0.00254199	2.13e-11	2.49291	0.287523	-0.0189	4.12e-07	0.00972713	8.4e-07	0.0218363	0.0656901	0.0095	0.381	0.0688003	0.0131598	1.1e-07	No
rs9330454	9	92515514	A	G	0.432766	0.011589	0.00173083	2.15e-11	33.5854	5.09e-08	-0.0248	1.51e-18	0.00339539	0.024	0.00946436	0.265001	0.0027	0.7434	0.0190223	0.0094536	0.042	No
rs3803573	16	15138413	C	T	0.70539	0.0128667	0.00192194	2.16e-11	20.9222	2.86e-05	-0.0228	1.31e-14	0.00553869	0.00069	0.00653484	0.472735	0.01	0.2359	0.0360622	0.010163	0.00045	No
rs4906266	14	103280067	C	A	0.345764	0.0131531	0.00196488	2.17e-11	0.62741	0.730735	-0.0083	0.003284	0.00928738	2.4e-10	0.0137431	0.112346	0.0334	2.45e-05	0.0854042	0.00975783	1.7e-19	No
rs2594994	3	11339960	T	A	0.177378	0.0171974	0.00257305	2.33e-11	24.7631	4.2e-06	0.0055	0.1198	0.0152304	1.2e-16	0.0200032	0.073151	0.0215	0.0421	0.0241994	0.0120959	0.066	No
rs2229330	1	6649228	G	T	0.072623	0.0247919	0.00371335	2.45e-11	5.92113	0.0517897	-0.0079	0.165	0.0193404	2.7e-13	0.0128166	0.461466	0.0263	0.1458	0.0344225	0.0177545	0.038	No
rs5742915	15	74336633	T	C	0.538639	0.0117275	0.00175817	2.55e-11	29.1529	4.67e-07	-0.0257	2.35e-16	0.00476778	0.00059	-0.00396167	0.635616	0.0026	0.7483	0.0548216	0.00932727	2.8e-09	No
rs11642090	16	81730582	C	T	0.375059	0.0133637	0.0020045	2.61e-11	16.5665	0.000253	0.0017	0.5515	0.01146	3.6e-15	0.0167662	0.0498391	0.0222	0.004944	0.0576813	0.00964689	1.2e-09	No
rs1982441	8	28021769	T	G	0.13108	0.0183246	0.00274944	2.65e-11	0.898931	0.637969	-0.0102	0.008977	0.0125425	2.9e-10	0.0246963	0.0310356	0.0264	0.0141	0.0756378	0.0137842	1.3e-08	No
rs201237	6	10020243	A	G	0.654424	0.0132503	0.00198957	2.74e-11	6.95679	0.0308569	-0.0083	0.003283	0.0101091	3.7e-12	-0.0042468	0.623257	0.0174	0.0229	0.0406584	0.00973399	4.7e-05	No
rs11225161	11	102070494	C	T	0.927649	0.0228753	0.00343611	2.79e-11	3.55056	0.169436	-0.0266	7.96e-08	0.0124304	1.8e-06	0.0235536	0.117312	0.014	0.3244	0.014422	0.0178943	0.39	No
rs13011472	2	57961602	C	G	0.510517	0.0118727	0.00178345	2.79e-11	8.14415	0.017042	-0.0165	7.29e-10	0.00582589	4.9e-05	0.0160684	0.0542001	0.0102	0.1895	0.0515887	0.00925209	1.2e-08	No
rs1348252	3	42418752	C	T	0.245603	0.0140255	0.00210812	2.87e-11	2.56685	0.277086	-0.0162	5.04e-07	0.00812929	6.9e-07	0.0163429	0.0961391	0.0158	0.07476	0.0704195	0.0108007	7.7e-11	No
rs8023761	15	83647740	G	A	0.68009	0.0131749	0.00198532	3.22e-11	0.13806	0.933299	-0.0091	0.001319	0.00899212	4.8e-09	0.0206731	0.021047	0.0028	0.7287	0.0346691	0.00998468	0.00081	No
rs9318238	13	74538020	T	C	0.236467	0.0135252	0.00204009	3.36e-11	24.7819	4.16e-06	-0.0257	8.36e-16	0.00462691	0.0069	0.0137464	0.171524	0.0037	0.6763	0.0149356	0.0109661	0.15	No
rs6670211	1	29576784	A	C	0.455586	0.0120058	0.00181139	3.4e-11	7.97359	0.0185591	-0.0164	2.78e-09	0.00670646	2.8e-06	0.00540646	0.519625	-0.0005	0.9472	-0.00486692	0.0093585	0.66	No
rs12817542	12	103736499	T	C	0.060888	0.0254808	0.00384719	3.51e-11	1.44701	0.485049	-0.0188	0.001166	0.0182577	2.8e-10	0.0173189	0.289316	0.0207	0.1936	0.0641587	0.0193901	0.0012	No
rs118104429	8	137939667	A	C	0.025582	0.0384558	0.00580658	3.52e-11	7.46619	0.0239187	-0.061	2.29e-09	0.0203337	7e-06	0.0335089	0.268776	-0.0195	0.5788	-0.0356869	0.030161	0.24	No
rs2675612	10	63523266	T	C	0.276334	0.013374	0.00202247	3.77e-11	3.9383	0.139576	-0.0158	1.16e-07	0.00726871	1.2e-06	0.0122538	0.183117	0.01	0.2343	0.0425224	0.0103891	4.9e-05	No
rs12601380	17	34904985	A	C	0.586857	0.0124349	0.00188056	3.78e-11	3.02631	0.220214	-0.0116	3.26e-05	0.00828447	3e-09	0.00317741	0.707766	0.0159	0.04417	0.0797322	0.00940688	2e-17	No
rs6876986	5	95703329	C	G	0.28601	0.0129865	0.00196443	3.82e-11	7.62316	0.0221132	-0.0172	6.86e-09	0.00600828	0.00012	0.0266688	0.00352549	0.004	0.6267	0.0716685	0.0102655	4.9e-12	No
rs753074	15	72101087	C	T	0.891816	0.0194391	0.00294217	3.92e-11	2.13887	0.343203	-0.0202	9.62e-06	0.0109838	1.2e-06	0.0402344	0.00426206	0.0183	0.1789	0.020258	0.0151611	0.18	No
rs11556924	7	129663496	C	T	0.61058	0.0119703	0.00181185	3.93e-11	27.5717	1.03e-06	-0.0226	1.74e-15	0.00505309	0.00031	-0.00551008	0.527219	0.0093	0.3068	0.0281241	0.00950481	0.0032	No
rs12909651	15	46571621	A	G	0.415208	0.011951	0.00181449	4.51e-11	6.15384	0.0461011	-0.0146	6.41e-08	0.00573178	5.3e-05	0.026103	0.00211096	0.0136	0.07871	0.0591682	0.00943423	3.9e-10	No
rs2908807	17	7563354	C	T	0.2533	0.0140764	0.00213771	4.55e-11	0.280916	0.86896	-0.0094	0.002433	0.0098831	1.3e-09	0.0175028	0.0700551	0.0214	0.01699	0.0138853	0.0109389	0.22	No
rs564548	2	23837135	C	T	0.771246	0.0138818	0.00210924	4.66e-11	11.088	0.00391089	-0.0203	4.9e-10	0.00531414	0.00054	0.0304235	0.0026906	0.0145	0.1251	0.0403149	0.0110115	0.00022	No
rs12872889	13	28674628	C	T	0.231105	0.0140283	0.00213278	4.79e-11	9.68907	0.00787129	-0.02	1.22e-09	0.00780987	3.2e-06	0.00308898	0.750019	0.0224	0.02424	0.0591072	0.0111641	8.5e-08	No
rs3774604	3	53824136	C	T	0.631097	0.0124911	0.00190253	5.19e-11	1.43317	0.488418	-0.0124	9.28e-06	0.00755438	7.8e-08	0.0112958	0.19761	0.0101	0.2025	0.0261159	0.00959615	0.0057	No
rs1402987	3	27057245	G	A	0.479171	0.0120676	0.00183952	5.37e-11	0.247629	0.883544	-0.0104	9.79e-05	0.00736159	6.4e-08	0.0175303	0.0349438	0.0043	0.5716	0.0333608	0.00926486	0.00038	No
rs7306736	12	16915325	T	C	0.591669	0.0120741	0.0018405	5.37e-11	9.49591	0.0086694	-0.0164	3.15e-09	0.00689307	1.5e-06	0.000925	0.912931	0.016	0.04738	0.014376	0.00952011	0.12	No
rs12514413	5	107323866	C	T	0.225773	0.0140266	0.00214279	5.91e-11	11.1762	0.00374208	-0.0204	1.31e-10	0.00725015	2.2e-05	0.0052241	0.611608	0.0249	0.005885	0.0643779	0.0111368	7.8e-09	No
rs72785601	2	32800522	T	C	0.893362	0.0192662	0.00294604	6.16e-11	10.9988	0.00408918	-0.0281	3.87e-10	0.00968398	8.1e-06	0.00338831	0.820141	0.0261	0.04754	0.0397582	0.0149168	0.0086	No
rs9464047	6	54119064	A	G	0.054145	0.0280348	0.00429082	6.42e-11	13.1038	0.00142742	-0.0023	0.7027	0.0235252	6.9e-15	0.00203209	0.920291	0.0145	0.4021	0.0686367	0.0206713	0.0006	No
rs17114658	14	29707949	A	T	0.389282	0.0126112	0.00193222	6.72e-11	2.66562	0.263736	-0.0091	0.004776	0.00923913	7e-11	0.00435575	0.620263	0.0081	0.3361	0.0317784	0.00966627	0.00037	No
rs12102007	15	90012094	C	A	0.21723	0.0146601	0.00224793	6.96e-11	3.62259	0.163442	-0.0125	0.0001165	0.010133	1.2e-09	0.00198116	0.836664	0.0179	0.05649	-0.0038129	0.0113006	0.67	No
rs2224272	20	54158005	T	G	0.223791	0.0145071	0.00222454	6.97e-11	4.4865	0.106113	-0.007	0.03548	0.00980309	6.7e-09	0.0372037	0.000146	0.0126	0.18	0.055643	0.0111878	4.6e-07	No
rs1858740	3	38438372	C	T	0.56012	0.0119918	0.00184057	7.26e-11	1.87953	0.390719	-0.0128	3.31e-06	0.00730578	3e-07	0.0118953	0.160688	0.0267	0.0003821	0.0354091	0.0093276	0.00015	No
rs58006672	16	24685641	G	A	0.275345	0.0134932	0.00207153	7.34e-11	1.31328	0.518591	-0.0114	0.0002046	0.00921866	3.6e-09	0.00802479	0.391973	0.037	2e-05	0.0142308	0.0104158	0.2	No
rs27555	5	34929368	G	T	0.316597	0.0126287	0.00193985	7.51e-11	9.97813	0.00681204	-0.0177	9.76e-10	0.0068429	6.5e-06	0.00329892	0.714174	0.0001	0.9935	0.0118837	0.0100054	0.31	No
rs628730	11	84782537	C	T	0.60856	0.0115525	0.00177679	7.93e-11	31.3929	1.52e-07	-0.023	3.04e-17	0.0039793	0.007	0.00152501	0.8586	-0.0003	0.9677	0.0648074	0.00950316	6.2e-11	No
rs17456958	14	25939932	G	A	0.732659	0.0135098	0.00207976	8.26e-11	1.3702	0.50404	-0.0096	0.002257	0.00824973	4.9e-08	0.0293522	0.00164044	0.0143	0.08857	0.0994871	0.0105138	2.9e-21	No
rs4801809	19	50334895	T	C	0.08949	0.0200598	0.00308888	8.35e-11	18.4393	9.91e-05	-0.0359	3.65e-13	0.00954191	0.00029	0.00281051	0.852279	0.0167	0.2439	0.0791286	0.0170552	3.1e-06	No
rs7729225	5	77142829	A	G	0.463699	0.0113895	0.00175419	8.43e-11	17.7926	0.000137	-0.0197	4.53e-13	0.00393509	0.0032	0.0166621	0.0498586	0.0175	0.02195	0.00510362	0.00930288	0.51	No
rs9333289	2	187498107	T	C	0.720745	0.0129803	0.0020003	8.63e-11	5.4197	0.0665467	-0.0164	3.55e-08	0.00651405	3.3e-05	0.0218623	0.0224461	0.0073	0.387	0.0117985	0.010294	0.27	No
rs115126664	1	151002468	A	G	0.043481	0.028208	0.00435295	9.16e-11	10.8887	0.00432058	-0.0426	8.31e-11	0.012834	0.00015	0.0273622	0.18367	0.0374	0.04543	0.113593	0.0226814	9.7e-07	No
rs72748948	15	63672925	T	C	0.077647	0.0225057	0.0034733	9.2e-11	3.224	0.199488	-0.0145	0.007284	0.0143827	4.7e-08	0.0593947	0.000245	-0.0162	0.3215	-0.0133968	0.0177542	0.51	No
rs34835556	8	15756109	T	G	0.551947	0.0119237	0.00184347	9.93e-11	0.374623	0.829186	-0.0107	7.7e-05	0.0072904	1.5e-07	0.0175756	0.0362777	0.0154	0.04335	-0.00833251	0.00937563	0.33	No
rs75387636	10	120278394	A	G	0.041603	0.0298217	0.00461227	1.01e-10	0.292912	0.863764	-0.0194	0.003385	0.0201666	8e-09	0.0464451	0.015742	0.0308	0.1089	0.0268139	0.0232334	0.28	No
rs7517340	1	243710190	T	C	0.1819	0.0146142	0.00226088	1.02e-10	19.095	7.14e-05	-0.0257	1.16e-13	0.00519585	0.0032	0.015886	0.146986	0.0174	0.07755	0.00984101	0.0120133	0.36	No
rs12414768	10	2291059	G	A	0.084157	0.0211484	0.0032723	1.03e-10	2.75684	0.251977	-0.0219	5.89e-06	0.0111649	4.7e-06	0.0463684	0.00386011	0.0052	0.7035	0.00908044	0.016763	0.54	No
rs1935354	9	27822531	C	T	0.483637	0.0122985	0.00190424	1.06e-10	7.75414	0.0207115	-0.0018	0.5031	0.00948715	4.5e-12	0.0207347	0.0129691	0.0144	0.05743	0.061246	0.00930848	8.2e-12	No
rs6760186	2	29087274	T	C	0.492833	0.0114264	0.00176984	1.07e-10	11.4959	0.00318929	-0.0173	7.88e-11	0.00485586	0.00044	0.0159438	0.0564209	0.0133	0.07731	0.0440922	0.00921739	7.8e-07	No
rs540514	11	94159005	C	G	0.732728	0.0126442	0.00195937	1.1e-10	27.4184	1.11e-06	-0.0244	3.72e-16	0.00376177	0.013	0.0105964	0.268732	0.0153	0.07116	0.0371679	0.0104809	0.00026	No
rs12048727	1	71769465	A	G	0.671526	0.0120921	0.00187474	1.12e-10	14.6146	0.000671	-0.0196	4.59e-12	0.00490552	0.00071	0.0123957	0.157995	0.0236	0.002698	-0.00390858	0.00986143	0.78	No
rs7569376	2	205385322	T	C	0.203641	0.0145094	0.00224982	1.13e-10	2.3458	0.309468	-0.0164	1.26e-06	0.00827342	1.5e-06	0.0168343	0.0995566	0.0281	0.003224	0.0931752	0.011512	5.3e-16	No
rs114386472	3	131623609	A	T	0.903614	0.0201828	0.00313088	1.15e-10	0.427335	0.807617	-0.0148	0.00115	0.0133066	4.1e-08	0.0375164	0.0100886	0.0173	0.1767	0.104882	0.0157076	5.9e-11	No
rs67711978	2	69699104	A	T	0.18221	0.0147199	0.00228954	1.28e-10	25.2068	3.36e-06	-0.027	9.97e-15	0.00622115	0.00067	-0.00373007	0.737872	0.0152	0.1335	0.0391866	0.0119534	0.001	No
rs881301	8	38332318	C	T	0.413353	0.0119773	0.0018686	1.46e-10	0.181407	0.913289	-0.0095	0.0005119	0.00769388	7.8e-08	0.0200289	0.0180132	0.025	0.001287	0.0539021	0.00939028	1.2e-08	No
rs67937375	18	40729163	G	A	0.625567	0.0120709	0.00188457	1.5e-10	0.686985	0.709289	-0.0115	5.81e-05	0.00702683	5.1e-07	0.0199699	0.0180397	0.0011	0.8861	0.0630293	0.00961967	4.7e-11	No
rs4757638	11	18312953	A	G	0.6258	0.011915	0.00186111	1.53e-10	2.77786	0.249341	-0.0133	1.35e-06	0.00629151	8.3e-06	0.0205729	0.0161607	0	0.9965	0.0381795	0.00962058	5.5e-05	No
rs4123550	2	6335511	G	A	0.497587	0.0113661	0.00177603	1.56e-10	9.33077	0.00941564	-0.0167	8.73e-10	0.00484858	0.00029	0.0178681	0.0323966	-0.0093	0.2194	0.0329872	0.00933941	0.00035	No
rs7118897	11	68360680	G	A	0.737549	0.01388	0.0021694	1.57e-10	7.0582	0.0293313	-0.0029	0.46	0.0111475	5.1e-12	0.0213023	0.0303844	NA	NA	0.0454192	0.0105296	4.9e-05	No
rs6979832	7	127856276	G	A	0.497052	0.0120963	0.00189129	1.6e-10	9.11231	0.0105023	-0.0017	0.5203	0.00903476	4.5e-11	0.0279646	0.000808	0.0191	0.01491	0.0219924	0.00932492	0.015	No
rs6686531	1	87713613	A	G	0.430513	0.0118772	0.0018606	1.73e-10	0.154239	0.925779	-0.01	0.0002428	0.00769811	4.9e-08	0.0144389	0.0875931	0.0074	0.3263	0.0270755	0.00933816	0.0022	No
rs62478569	8	4140139	A	G	0.292558	0.013217	0.00207413	1.86e-10	4.87978	0.0871704	-0.0038	0.2104	0.0097453	8.6e-11	0.0241595	0.00912431	0.0236	0.005787	0.0356621	0.0102641	0.00038	No
rs74832004	14	101511771	C	A	0.984126	0.0455351	0.00715224	1.93e-10	17.6209	0.000149	-0.0855	5.89e-13	0.0184237	0.00059	0.0264824	0.423077	-0.0531	0.1808	0.123877	0.0371672	0.00065	No
rs4767646	12	118394577	T	A	0.282173	0.0134867	0.00212045	2.01e-10	9.6742	0.00793001	-0.0009	0.7629	0.0107698	1.3e-12	0.0195843	0.0333227	0.0152	0.09662	0.0307755	0.0104135	0.0034	No
rs7753558	6	117523471	C	A	0.365251	0.0125499	0.00197461	2.08e-10	9.87359	0.00717756	-0.0011	0.6905	0.00939423	1.4e-11	0.0269895	0.00230887	0.0166	0.04244	0.0369751	0.00968483	8.8e-05	No
rs2383156	9	20885240	G	A	0.421872	0.011864	0.00186937	2.2e-10	0.00709273	0.99646	-0.0089	0.001011	0.00810661	3.3e-08	0.017056	0.04292	0.003	0.6954	0.00637288	0.00941723	0.47	No
rs2861055	2	77716557	T	C	0.253326	0.0133216	0.00209974	2.23e-10	2.11104	0.348012	-0.0116	0.0001871	0.00732252	1.6e-06	0.0317986	0.00123129	0.0055	0.5354	0.0024374	0.0105848	0.77	No
rs79842954	2	175191505	C	T	0.930347	0.0224685	0.00354454	2.31e-10	10.7959	0.00452592	-0.035	3.16e-10	0.0108162	6.9e-05	0.0123725	0.491188	0.0289	0.105	0.0687752	0.0182167	0.00016	No
rs10887580	10	88097626	A	G	0.378321	0.0120058	0.00189489	2.36e-10	0.217274	0.897056	-0.0105	0.0001741	0.00728572	1.3e-07	0.0161086	0.060406	0.0102	0.2031	0.0546456	0.00963122	1.9e-08	No
rs2613801	19	5126268	T	C	0.444901	0.0113592	0.00179277	2.36e-10	9.67694	0.00791916	-0.0168	5.51e-10	0.00519819	0.00016	0.0119476	0.154697	0.0073	0.341	0.0253236	0.00937097	0.0028	No
rs2029641	4	167440421	G	A	0.472832	0.0113624	0.00179462	2.43e-10	10.4944	0.00526213	-0.0169	5.67e-10	0.00547446	4e-05	0.00482671	0.562246	0.002	0.7998	0.0304906	0.00929408	0.00032	No
rs3013431	1	113242488	C	T	0.388362	0.0120995	0.00191113	2.43e-10	3.46112	0.177185	-0.0052	0.06	0.00860612	3.5e-09	0.0271558	0.00143473	0.012	0.1292	-0.0162823	0.0094646	0.082	No
rs72788811	5	137996661	C	T	0.794056	0.0136282	0.00215352	2.48e-10	17.1231	0.000191	-0.0235	3.47e-12	0.0047441	0.0065	0.0245666	0.0143632	0.0195	0.03783	0.0304155	0.0114893	0.01	No
rs693437	6	165944280	G	A	0.16913	0.0151284	0.00239168	2.53e-10	5.79209	0.0552412	-0.02	2.51e-08	0.00774734	4.3e-05	0.0196226	0.082355	0.0178	0.07639	0.0377723	0.0123629	0.0021	No
rs10524	1	41726473	C	T	0.1157	0.0173321	0.00274096	2.56e-10	21.8312	1.82e-05	-0.033	5.04e-14	0.00665668	0.0021	0.00781	0.538776	0.0148	0.2291	-0.0111473	0.0144625	0.37	No
rs7159440	14	33819655	G	A	0.305526	0.0123238	0.00194931	2.58e-10	6.90051	0.0317376	-0.0169	9.01e-09	0.0059099	4.4e-05	0.013162	0.147412	0.008	0.3367	0.0238155	0.0101326	0.022	No
rs4727295	7	76636756	G	A	0.172462	0.0160818	0.00254573	2.66e-10	14.2034	0.000824	0.0013	0.7539	0.0133669	7.1e-14	0.0175075	0.108205	0.0331	0.006318	0.122966	0.0123541	1.8e-23	No
rs1179904	6	90322573	T	C	0.195273	0.0146062	0.00231361	2.73e-10	2.80196	0.246356	-0.0112	0.001071	0.00850122	7.2e-07	0.0388595	0.000427	0.009	0.3671	0.0591293	0.0117795	4.5e-07	No
rs1349360	5	165901439	C	T	0.440368	0.010959	0.00173621	2.75e-10	27.4224	1.11e-06	-0.0216	1.75e-15	0.0029723	0.041	0.0168303	0.0453231	-0.0087	0.2567	0.00855521	0.00936222	0.43	No
rs11121031	1	7883460	T	C	0.70645	0.012581	0.0019937	2.78e-10	4.74307	0.0933372	-0.0156	1.4e-07	0.00701451	5.3e-06	0.0100406	0.288654	0.0254	0.002792	0.0112557	0.010142	0.24	No
rs845081	10	125224920	A	G	0.375174	0.0116133	0.00184363	2.99e-10	9.86146	0.00722123	-0.0169	6.3e-10	0.00562168	9.3e-05	0.00851347	0.32272	0.0303	8.91e-05	0.0610831	0.00958244	1e-10	No
rs10885077	10	112759731	G	T	0.737955	0.0127759	0.00203245	3.26e-10	7.19439	0.0274005	-0.0172	1.6e-08	0.00573798	0.00019	0.022747	0.0176242	0.0131	0.134	0.022144	0.0105681	0.029	No
rs10869977	9	80457276	G	A	0.564965	0.011104	0.00176731	3.32e-10	16.1871	0.000305	-0.0188	7.06e-12	0.00378035	0.0049	0.0194815	0.0218338	0.0099	0.1921	0.0560948	0.00938589	1.8e-09	No
rs824203	15	24009503	A	C	0.494695	0.0116178	0.00184966	3.36e-10	5.50305	0.0638305	-0.0057	0.03908	0.00744167	5.2e-08	0.0341714	6.24e-05	0.012	0.1322	0.00854365	0.00930567	0.36	No
rs76565625	14	80318018	T	C	0.045162	0.0284002	0.004525	3.47e-10	2.10749	0.34863	-0.016	0.0266	0.019509	1e-08	0.0626791	0.0032716	0.0111	0.5886	-0.025116	0.022585	0.21	No
rs153701	19	34003255	T	C	0.454853	0.0115065	0.00183779	3.82e-10	2.12995	0.344736	-0.0087	0.001341	0.00685733	7.1e-07	0.0280918	0.000735	0.0048	0.5337	0.0102518	0.00942739	0.33	No
rs10930931	2	181598525	C	G	0.507923	0.0115964	0.00185254	3.86e-10	0.0551765	0.972789	-0.0082	0.002229	0.00787973	2.4e-08	0.016026	0.0544127	0.0038	0.6213	0.0569863	0.00924239	4.5e-10	No
rs10491334	5	110772404	T	C	0.203027	0.0137834	0.00220213	3.87e-10	25.1717	3.42e-06	-0.0263	2.02e-14	0.00538106	0.0013	-0.00295233	0.785373	0.0082	0.4307	-0.0135112	0.0115063	0.21	No
rs111304137	1	190475725	A	G	0.976068	0.0375417	0.00600078	3.95e-10	0.363548	0.83379	-0.0265	0.003493	0.0251648	4.9e-08	0.064339	0.0111517	0.0542	0.04952	0.112533	0.0303545	0.00015	No
rs1653559	12	90766691	A	G	0.343744	0.0123005	0.00196619	3.95e-10	0.760342	0.683744	-0.0072	0.01223	0.00884143	2.2e-09	0.0146276	0.0974361	0.019	0.02117	0.036844	0.00983032	0.00031	No
rs113173495	1	179737821	G	A	0.136489	0.0160968	0.00257375	4e-10	12.3829	0.00204684	-0.0254	1.52e-10	0.00633106	0.0014	0.026202	0.0272772	0.011	0.3338	0.0334053	0.0134251	0.0066	No
rs11641362	16	85335951	G	T	0.673283	0.0124248	0.00198776	4.09e-10	2.97762	0.225641	-0.0053	0.06811	0.00867113	2.9e-09	0.0255359	0.0038499	-0.0048	0.5538	0.026218	0.00991157	0.0074	No
rs10761758	10	65172747	A	T	0.527328	0.0110242	0.00176399	4.12e-10	20.9942	2.76e-05	-0.0197	1.73e-13	0.00462218	0.0013	0.00214706	0.797856	0.0154	0.04282	0.052777	0.00929508	3.6e-09	No
rs10786980	10	108673413	G	C	0.400634	0.0115842	0.00185595	4.33e-10	1.84714	0.397098	-0.0104	0.0001445	0.00636465	3.1e-06	0.0259559	0.00205528	0.0185	0.01854	0.0357884	0.00956441	0.00023	No
rs76495904	15	41272057	A	G	0.090354	0.0195875	0.00314008	4.44e-10	17.3894	0.000167	-0.0353	2.18e-12	0.00760586	0.00099	0.0117919	0.490375	0.0016	0.9154	0.0589494	0.016203	0.00033	No
rs6994491	8	54131634	T	C	0.182734	0.0149744	0.00240313	4.63e-10	0.245777	0.884362	-0.01	0.004055	0.0098579	2.6e-08	0.0240432	0.0304467	0.0052	0.6062	0.0411645	0.0119962	0.00028	No
rs61910820	11	134581277	G	A	0.175228	0.0148102	0.00237737	4.67e-10	7.10002	0.0287244	-0.0197	4.06e-08	0.0082325	5.8e-06	0.0049653	0.645758	0.0169	0.08568	0.0844126	0.0122735	4.1e-12	No
rs4235642	5	103818412	A	G	0.620142	0.0122013	0.00195861	4.68e-10	7.90593	0.0191977	-0.0016	0.5807	0.00962333	2.1e-11	0.0217066	0.0131586	0.0163	0.04753	-0.036083	0.00954353	0.00011	No
rs12043212	1	155964698	G	A	0.636451	0.0121718	0.00195463	4.75e-10	3.13894	0.208156	-0.0074	0.008893	0.00896956	2.7e-10	0.00277216	0.753085	0.0249	0.002219	0.0498424	0.00958756	6.7e-08	No
rs12040029	1	213451958	T	C	0.121866	0.0164757	0.00264701	4.84e-10	26.8617	1.47e-06	-0.0367	1.69e-15	0.00479741	0.031	0.0181732	0.191872	-0.0058	0.63	0.0314231	0.0147519	0.032	No
rs2930713	9	7649442	T	G	0.537733	0.0113972	0.00183329	5.07e-10	0.595373	0.742534	-0.0104	0.0001126	0.00694044	9.2e-07	0.0189968	0.0238265	-0.0048	0.5298	0.0187301	0.00935528	0.043	No
rs67771234	10	103842430	T	G	0.764453	0.0129417	0.00208273	5.17e-10	9.80217	0.0074385	-0.0195	6.26e-10	0.00587623	0.00029	0.0130405	0.175873	0.0185	0.0482	0.0289392	0.0110061	0.0085	No
rs6864091	5	75010002	T	C	0.639446	0.0119802	0.00193291	5.72e-10	0.240486	0.886705	-0.0077	0.005362	0.00813879	1.5e-08	0.0166854	0.0551214	0.0191	0.01463	0.128943	0.00965331	1.5e-41	No
rs56018934	1	110060710	C	T	0.92817	0.0229764	0.0037076	5.75e-10	5.8265	0.0542989	-0.0051	0.3413	0.0183144	1.1e-11	0.0225725	0.190786	0.0116	0.4527	0.0559601	0.0180074	0.0019	No
rs2243582	13	21305153	G	A	0.311849	0.0119096	0.00192251	5.84e-10	9.99307	0.00676133	-0.0177	7.55e-10	0.00564024	0.00021	0.0106926	0.231075	-0.001	0.9064	-0.00444319	0.0100418	0.63	No
rs1001039	10	124947129	A	G	0.869474	0.016799	0.00271504	6.12e-10	3.83561	0.146929	-0.0196	1.49e-06	0.00983546	1.4e-06	0.00900969	0.472264	0.0206	0.08464	0.0547416	0.013862	9.5e-05	No
rs538579	3	62711674	C	G	0.314993	0.0124295	0.00200892	6.13e-10	3.40128	0.182566	-0.005	0.08298	0.00882921	4.2e-09	0.0268598	0.00286556	0.0209	0.01052	0.0653724	0.00995737	5.8e-11	No
rs75556712	5	60606482	G	A	0.822185	0.0154839	0.00250575	6.44e-10	5.67669	0.0585223	-0.0046	0.2021	0.0120068	9.6e-12	0.00668015	0.565614	-0.0063	0.5513	0.0307796	0.0121897	0.0075	No
rs7910407	10	13563816	T	C	0.698353	0.0119389	0.00193278	6.53e-10	18.8279	8.16e-05	-0.0211	1.93e-12	0.00520457	0.00053	0.000847	0.925073	0.0048	0.5618	0.0241661	0.0101592	0.017	No
rs76439972	12	92456577	C	T	0.927891	0.0206243	0.00334761	7.23e-10	21.7469	1.9e-05	-0.0389	3.09e-13	0.00592109	0.026	0.0375192	0.0168496	0.004	0.7907	0.00445798	0.0180483	0.77	No
rs56228675	10	87992875	C	T	0.118031	0.0166799	0.00271096	7.61e-10	13.9682	0.000927	-0.028	2.46e-11	0.00674617	0.0017	0.017358	0.161291	0.0046	0.7195	0.0394361	0.0146436	0.0036	No
rs3847001	7	27564305	C	T	0.309468	0.0117287	0.00191064	8.32e-10	13.1242	0.00141288	-0.0187	7.08e-11	0.00478013	0.0017	0.0153343	0.0923039	0.0155	0.06325	0.0155366	0.0100384	0.13	No
rs6845639	4	38716721	A	G	0.571855	0.0115774	0.00188627	8.37e-10	0.551785	0.758894	-0.0069	0.01278	0.00821081	8.2e-09	0.0158951	0.063071	0.0069	0.3728	0.0644425	0.00949364	3.4e-11	No
rs12654405	5	60950429	G	A	0.259803	0.0130093	0.00212007	8.45e-10	1.26603	0.530988	-0.0105	0.0005788	0.00870612	2.2e-08	0.00703543	0.473233	0.014	0.1025	0.0309635	0.0106352	0.0029	No
rs385488	16	65940600	C	T	0.39269	0.0115551	0.00188424	8.65e-10	0.0761732	0.96263	-0.0092	0.0008611	0.00717079	2.2e-07	0.0179663	0.03503	0.0185	0.01913	0.0350864	0.00956844	0.00016	No
rs6713357	2	206090229	A	G	0.421222	0.0111876	0.00182443	8.67e-10	5.15018	0.0761471	-0.0147	1.05e-07	0.00569865	3.5e-05	0.0119324	0.159749	0.0265	0.0004448	0.0512914	0.00933472	1.2e-07	No
rs7722718	5	92557899	A	T	0.598551	0.0112678	0.00183756	8.68e-10	7.07882	0.0290305	-0.0152	2.23e-08	0.00568443	3.1e-05	0.007166	0.400771	0.0114	0.1436	0.0462963	0.00945704	1.5e-06	No
rs7832399	8	25752918	T	C	0.578689	0.0115072	0.00187708	8.77e-10	3.5751	0.167369	-0.0058	0.03545	0.00755019	5.6e-08	0.02962	0.000562	0.0072	0.3463	0.0345174	0.00938977	0.00025	No
rs28362947	11	57369008	G	C	0.266997	0.0127212	0.00207706	9.09e-10	0.585552	0.746189	-0.0099	0.001112	0.00800428	4.9e-07	0.0248479	0.00896148	0.0198	0.01963	0.0284635	0.0105003	0.011	No
rs10839974	11	8103353	T	C	0.121168	0.0174149	0.00284386	9.14e-10	1.24234	0.537315	-0.0139	0.001573	0.0106788	5e-07	0.040088	0.00460235	0.029	0.02643	0.0603192	0.0142655	2e-05	No
rs183790	12	32478244	C	G	0.550015	0.0110749	0.00181041	9.51e-10	4.15657	0.125145	-0.0136	3.53e-07	0.00584067	3.8e-05	0.0152454	0.070479	-0.0014	0.8526	0.0231263	0.00934307	0.0088	No
rs872281	14	40834177	C	T	0.823037	0.0143773	0.00235553	1.04e-09	4.47366	0.106797	-0.0165	4.04e-06	0.00768316	9e-05	0.0336965	0.00187971	0.0081	0.4138	0.072035	0.01225	3.7e-09	No
rs2629881	3	59778271	T	C	0.77811	0.0138091	0.00226369	1.06e-09	3.583	0.16671	-0.0045	0.1716	0.010349	3.3e-10	0.0194142	0.0462317	0.0014	0.8828	0.0299149	0.0111559	0.0072	No
rs6050911	20	2634167	C	A	0.757879	0.0126052	0.00206654	1.06e-09	21.2364	2.45e-05	-0.0229	7.48e-13	0.0055098	0.00073	-0.00281231	0.773419	0.007	0.4522	0.0345507	0.010896	0.0011	No
rs2302432	7	75614864	T	G	0.961255	0.0288823	0.00474192	1.12e-09	0.920436	0.631146	-0.0287	3.69e-05	0.0176842	1.4e-06	0.0352526	0.120793	0.0183	0.3374	0.0270241	0.0240177	0.26	No
rs58861317	5	149425788	C	T	0.891919	0.0176971	0.00290765	1.15e-09	15.8929	0.000354	-0.0277	2.06e-10	0.00898474	4.5e-05	-0.0100904	0.484409	-0.0023	0.8494	0.00648542	0.014892	0.64	No
rs3815156	17	29685150	G	A	0.176606	0.0147074	0.00242013	1.22e-09	1.59261	0.450991	-0.0084	0.01748	0.00973337	7.4e-08	0.0312513	0.00348522	0.0118	0.2335	0.0441921	0.0122245	0.00069	No
rs73135161	7	72172185	T	C	0.90764	0.0189299	0.00311854	1.28e-09	7.14491	0.0280869	-0.0282	2.06e-08	0.0095878	7.5e-05	0.0170059	0.253988	-0.0083	0.5735	0.00438228	0.0160232	0.81	No
rs12053870	3	118302515	G	T	0.544906	0.0108288	0.001785	1.31e-09	8.95821	0.0113435	-0.0159	4.23e-09	0.00451737	0.00067	0.0168308	0.0454109	0.0055	0.4846	0.0323493	0.00931119	0.00032	No
rs78091838	7	5354330	T	C	0.115993	0.0167021	0.00275584	1.36e-09	15.7038	0.000389	-0.0305	1.35e-11	0.00679747	0.0021	0.0151806	0.228348	0.0438	0.002535	0.0527151	0.0145128	0.00024	No
rs13254582	8	143121547	T	G	0.548505	0.0111832	0.00184983	1.49e-09	0.554943	0.757697	-0.0083	0.0025	0.00694081	3.7e-07	0.0218143	0.00994626	0.0054	0.4848	0.0265367	0.00932033	0.0034	No
rs74237689	12	114340066	G	C	0.92508	0.021148	0.00349949	1.51e-09	2.82735	0.243247	-0.0175	0.0008208	0.0123218	4e-06	0.0572285	0.000777	0.0087	0.5697	0.105987	0.0176806	3.1e-09	No
rs4130357	3	1860457	A	G	0.389383	0.0111066	0.00183911	1.55e-09	14.6873	0.000647	-0.0172	2.73e-10	0.00549559	7.3e-05	-0.00281286	0.742619	0.0089	0.2453	0.000888598	0.00952379	0.8	No
rs7633995	3	180369750	G	A	0.100613	0.0189366	0.00313635	1.56e-09	1.85275	0.395986	-0.0095	0.06224	0.0145225	3.6e-09	0.0323576	0.0367037	0.0379	0.02627	0.0755132	0.01634	3.8e-06	No
rs1338188	1	67029862	T	C	0.146165	0.0152746	0.00253131	1.6e-09	15.5305	0.000424	-0.0253	5.02e-11	0.00722388	0.00029	0.000159	0.989561	0.0191	0.07463	0.0185263	0.013064	0.13	No
rs258994	7	110547182	C	T	0.411679	0.0114247	0.00189559	1.67e-09	0.925428	0.629573	-0.0065	0.01639	0.00796711	5.4e-09	0.0116965	0.161733	0.0128	0.09423	0.014173	0.00944732	0.095	No
rs1852006	7	77829768	G	A	0.643169	0.011764	0.00195346	1.72e-09	2.32081	0.31336	-0.0049	0.07949	0.00843983	4.5e-09	0.02082	0.0186102	0.0222	0.004745	0.0702737	0.00966966	6.4e-14	No
rs11080094	17	27539029	A	C	0.667792	0.0117977	0.00195948	1.74e-09	0.373977	0.829453	-0.0101	0.0004931	0.00750791	1.7e-07	0.0115625	0.197067	0.0093	0.2668	0.0187569	0.00998501	0.055	No
rs68015088	18	51484010	G	A	0.655581	0.0118358	0.00196642	1.76e-09	1.6457	0.439178	-0.0056	0.04768	0.00844143	8.6e-09	0.0204462	0.0220536	0.0072	0.3709	0.0375755	0.0098246	0.00012	No
rs6719507	2	29733801	G	A	0.558455	0.0112249	0.00186575	1.78e-09	0.531922	0.766469	-0.007	0.01028	0.00766097	6.1e-08	0.0193067	0.0215278	0.0066	0.3791	0.0292593	0.00928553	0.0012	No
rs11752814	6	37781723	T	G	0.855172	0.0155995	0.002594	1.81e-09	3.88226	0.143541	-0.0185	1.34e-06	0.00877786	5.8e-06	0.00962514	0.441932	0.0036	0.7351	0.0220618	0.0131562	0.075	No
rs12343000	9	131012256	C	T	0.243803	0.0123582	0.00205882	1.94e-09	11.4028	0.0033413	-0.0188	3.36e-09	0.00473219	0.0033	0.0281281	0.0049136	0.0098	0.2873	0.0661205	0.0108023	4.5e-10	No
rs3181269	11	33755956	C	T	0.743135	0.0128833	0.00214624	1.94e-09	2.32513	0.312683	-0.0052	0.09632	0.00922279	3.4e-09	0.0210524	0.0252058	0.0216	0.01438	0.0255632	0.0106108	0.014	No
rs7207937	17	46274552	G	A	0.893225	0.0166905	0.00278314	2.01e-09	24.3872	5.06e-06	-0.032	4.27e-14	0.00431895	0.053	0.0247698	0.0677876	0.0189	0.1144	0.0704972	0.0150689	2.3e-06	No
rs1030191	5	166743702	A	C	0.579259	0.01082	0.0018061	2.09e-09	8.44101	0.0146912	-0.0162	6.37e-09	0.00498004	0.00039	0.012747	0.130824	0.0162	0.03375	0.0185097	0.00942399	0.054	No
rs925649	3	37270864	T	C	0.411521	0.0107379	0.00179357	2.14e-09	12.9588	0.0015347	-0.0159	6.61e-09	0.00397423	0.0059	0.0293937	0.000673	0.0086	0.2723	-0.0176584	0.00943985	0.048	No
rs6875288	5	144506078	G	A	0.51292	0.0111353	0.00186264	2.26e-09	1.29216	0.524095	-0.0078	0.003308	0.00765511	1.3e-08	0.00618228	0.461024	0.0187	0.0136	0.0468268	0.00927145	5.8e-07	No
rs12575721	11	46823681	C	T	0.107966	0.0173392	0.00290451	2.38e-09	6.26615	0.0435835	-0.0231	1.04e-07	0.0094207	3.1e-05	0.0104953	0.42059	-0.0013	0.9225	0.0325893	0.0149478	0.027	No
rs1106995	4	60208272	T	G	0.713641	0.0117008	0.00196064	2.4e-09	11.9016	0.00260376	-0.0187	3.21e-10	0.0047321	0.0013	0.0123235	0.186075	0.0077	0.3444	0.0574025	0.0102575	9.1e-09	No
rs17424987	3	161475954	A	G	0.071585	0.0212369	0.00355835	2.4e-09	1.11969	0.571298	-0.0218	3.84e-05	0.0119375	3.8e-06	0.0290849	0.0960064	0.0073	0.6317	0.0831464	0.0178906	2.1e-06	No
rs5030938	10	70975916	T	C	0.687266	0.0120644	0.0020215	2.4e-09	3.14644	0.207376	-0.0045	0.1221	0.00873987	3.8e-09	0.0229752	0.0145704	0.0172	0.03266	0.011143	0.0100414	0.22	No
rs10163018	15	53525415	C	T	0.628705	0.0112057	0.00187817	2.43e-09	4.15857	0.12502	-0.0135	1.31e-06	0.00630305	6.8e-06	0.00629633	0.459742	0.0029	0.7151	0.0530002	0.00962871	6.3e-08	No
rs1397128	16	61919410	T	C	0.602893	0.0110745	0.00185836	2.53e-09	2.07945	0.353552	-0.012	1.02e-05	0.00635684	4.5e-06	0.0104042	0.21857	0.009	0.2439	0.0227312	0.00947559	0.016	No
rs2780790	1	242977333	C	T	0.312857	0.0117854	0.00197757	2.53e-09	0.71713	0.698678	-0.0098	0.00097	0.00732068	1.7e-06	0.0236168	0.00913966	0.0102	0.2213	0.0372337	0.00996736	0.00028	No
rs11628454	14	26298037	C	G	0.270079	0.0119123	0.00200126	2.64e-09	7.77245	0.0205226	-0.0171	2.76e-08	0.00523742	0.00078	0.0210351	0.0226992	0.0049	0.5755	0.00233017	0.0105414	0.94	No
rs12139953	1	153629755	G	A	0.537842	0.0109611	0.00184499	2.83e-09	3.01011	0.222005	-0.0112	3.92e-05	0.00675552	3.9e-07	0.0028682	0.736022	0.0162	0.0341	0.0101019	0.00925703	0.27	No
rs28478398	15	79368629	G	A	0.735174	0.0119777	0.00201612	2.83e-09	7.99104	0.0183979	-0.0177	1.97e-08	0.00537	0.00082	0.0206139	0.0305527	0.0066	0.4863	0.0461035	0.0106629	7.9e-06	No
rs1912668	6	165152074	G	T	0.533409	0.0106964	0.00180293	2.98e-09	12.8335	0.00163397	-0.0161	1.86e-09	0.00543762	5.7e-05	-0.00239139	0.774241	-0.008	0.2909	0.0156017	0.0092736	0.094	No
rs6039356	20	8999221	G	T	0.676298	0.0118096	0.00199068	2.98e-09	0.758349	0.684426	-0.0077	0.009611	0.00858073	1.4e-08	0.0106785	0.234032	0.0053	0.5141	0.0215137	0.00996032	0.029	No
rs7998440	13	33125206	G	A	0.633617	0.0110446	0.00186287	3.05e-09	11.1917	0.00371318	-0.0165	2.63e-09	0.00544931	9.8e-05	0.00118928	0.890083	0.0026	0.7398	0.0727821	0.00965505	4e-14	No
rs11672660	19	46180184	C	T	0.806517	0.0142036	0.00239675	3.1e-09	8.07989	0.0175985	-0.0039	0.2529	0.0119322	1.1e-11	0.00138963	0.888098	-0.0004	0.9653	0.170958	0.0117556	5.2e-48	No
rs9850555	3	137163620	A	T	0.548136	0.0105638	0.00178344	3.16e-09	20.4972	3.54e-05	-0.0185	3.6e-12	0.00466209	0.0008	-0.00338763	0.686738	0.0066	0.3803	-0.0277787	0.00928682	0.0032	No
rs11781699	8	118863061	C	T	0.182995	0.014121	0.00238604	3.26e-09	5.34559	0.069059	-0.0141	8.94e-05	0.00945358	5.8e-08	-0.00406332	0.702034	0.033	0.0004765	0.0642342	0.0119903	2.1e-07	No
rs62175963	2	161339964	T	C	0.574093	0.0112879	0.00190841	3.32e-09	3.8281	0.147482	-0.0036	0.1872	0.0085182	3.4e-10	0.0114645	0.175911	0.0049	0.534	-0.0220261	0.00931964	0.011	No
rs642102	6	6014302	G	A	0.554075	0.0108382	0.00183318	3.37e-09	0.867095	0.648205	-0.0105	8.75e-05	0.00609945	5.2e-06	0.0166813	0.0465275	0.0073	0.342	0.0241625	0.0093595	0.0064	No
rs6024742	20	54846660	C	A	0.237442	0.0119174	0.00201623	3.41e-09	32.7173	7.86e-08	-0.0254	3.36e-16	0.00254265	0.14	0.014605	0.141482	0.0122	0.163	8.4415e-05	0.010938	0.9	No
rs61928401	12	116145231	A	G	0.301149	0.0116901	0.00197792	3.41e-09	1.64996	0.438245	-0.0107	0.0003067	0.00675517	1.1e-05	0.0262567	0.0035359	0.004	0.641	0.0224587	0.0102686	0.036	No
rs4776742	15	66427055	A	G	0.271196	0.0121693	0.00205954	3.45e-09	0.627187	0.730816	-0.0113	0.0002442	0.00723735	3.4e-06	0.0212208	0.0290456	0.0069	0.4486	0.0412958	0.0105099	6.8e-05	No
rs2487698	1	44608672	C	T	0.715629	0.0116886	0.00198253	3.73e-09	10.5415	0.00513967	-0.0181	1.94e-09	0.00538338	0.00034	0.0068379	0.464128	-0.0034	0.687	-0.0128776	0.0102419	0.29	No
rs75050499	5	179740640	C	T	0.642597	0.0111215	0.00188747	3.81e-09	2.1868	0.335075	-0.0118	3.43e-05	0.00626121	3.3e-05	0.0226051	0.00960417	0.0014	0.8643	0.0254335	0.00969007	0.0051	No
rs61572255	14	48030450	C	G	0.637799	0.0109491	0.00185841	3.82e-09	14.9678	0.000562	-0.0181	9.87e-11	0.00521567	0.00057	0.00120396	0.89247	0.0247	0.002067	0.0219303	0.0096646	0.016	No
rs3812696	10	72025954	G	A	0.937032	0.0224096	0.00380645	3.93e-09	1.3834	0.500724	-0.0139	0.0107	0.016463	9.6e-09	0.0156947	0.312233	0.0303	0.05958	0.0121773	0.0190802	0.52	No
rs9559023	13	108013711	T	C	0.175772	0.0140457	0.00238729	4.02e-09	3.73909	0.154194	-0.0173	1.61e-06	0.00792913	1.4e-05	0.00976019	0.393813	0.0211	0.03235	0.0585036	0.0122855	2.3e-06	No
rs3816058	3	13004851	T	C	0.844817	0.0147101	0.00250269	4.16e-09	1.69821	0.427797	-0.0159	2.32e-05	0.00826044	1.9e-05	0.0238537	0.0388938	0.0046	0.6624	0.0204259	0.0128249	0.095	No
rs59068084	4	113256737	T	G	0.40982	0.0109267	0.0018617	4.38e-09	0.402239	0.817815	-0.0095	0.0007362	0.00674418	2.2e-06	0.0196059	0.0218107	0.0045	0.565	0.0508973	0.00942755	1.6e-07	No
rs2871866	15	99221888	T	C	0.766679	0.0123593	0.00210618	4.41e-09	5.34095	0.0692193	-0.0155	1.33e-06	0.00581817	0.00043	0.0267834	0.00445851	-0.0026	0.7758	0.0660415	0.0110554	4e-09	No
rs4793085	17	42320732	A	C	0.341901	0.0110521	0.00188489	4.53e-09	10.0288	0.0066416	-0.0169	2.87e-09	0.0051212	0.00044	0.00800775	0.36912	0.007	0.4032	0.0554279	0.00983933	1.4e-08	No
rs10913213	1	176563260	G	C	0.340704	0.0108603	0.00185232	4.54e-09	17.9078	0.000129	-0.0194	6.27e-12	0.0037293	0.011	0.0132135	0.134371	0.0126	0.1155	0.0115251	0.00975557	0.29	No
rs424921	11	16885024	G	A	0.0897823	0.018035	0.00307917	4.71e-09	11.2861	0.00354202	-0.0281	6.19e-10	0.00775504	0.0014	0.0157623	0.275986	0.032	0.01277	0.0545114	0.01627	0.0009	No
rs2239615	14	75745551	T	A	0.262333	0.0119082	0.00203465	4.84e-09	7.12616	0.0283514	-0.0169	3.75e-08	0.00569907	0.00039	0.0150207	0.11185	0.0155	0.08286	0.031735	0.0107581	0.003	No
rs7213767	17	35054784	A	G	0.703865	0.0116655	0.00199364	4.88e-09	3.41882	0.180972	-0.014	2.68e-06	0.00627536	1.4e-05	0.00910737	0.337599	0.0124	0.1407	0.0592263	0.0102553	3.2e-09	No
rs10791154	11	131473175	G	C	0.517043	0.010865	0.00186186	5.36e-09	0.831192	0.659947	-0.0059	0.02818	0.00755619	3.5e-08	0.0164346	0.0510975	0.0052	0.4897	0.060221	0.00929283	4.6e-11	No
rs10225027	7	110036332	C	T	0.578068	0.0104341	0.0017888	5.44e-09	13.6844	0.00106776	-0.0177	1.55e-10	0.0042615	0.0037	0.0120369	0.148356	0.0199	0.01122	0.00887069	0.00940424	0.43	No
rs1813212	11	89301382	A	G	0.554079	0.0107422	0.00184274	5.56e-09	0.395293	0.82066	-0.0093	0.0006096	0.00677618	2.8e-06	0.0186907	0.028097	0.0116	0.1418	0.0401981	0.00934209	1.5e-05	No
rs12489309	3	68565190	C	T	0.531064	0.0104607	0.00179469	5.59e-09	7.10515	0.0286508	-0.0147	3.97e-08	0.00486415	0.00035	0.0121777	0.146767	0.0077	0.3102	0.000906255	0.00927585	0.85	No
rs11257839	10	12546579	C	G	0.281793	0.0116362	0.00199699	5.65e-09	13.5163	0.00116136	-0.0177	1.87e-09	0.00575269	8.9e-05	-0.00413788	0.657732	0.0073	0.377	0.0112723	0.010324	0.24	No
rs2890652	2	142959931	C	T	0.160944	0.0140793	0.00241749	5.75e-09	9.63888	0.00807131	-0.021	4.66e-09	0.00679194	0.00038	0.00896436	0.410827	-0.006	0.5419	0.0627556	0.0125259	2.7e-07	No
rs74566047	18	30631797	C	T	0.942427	0.0232632	0.00399436	5.75e-09	0.0339119	0.983187	-0.0175	0.002415	0.0157006	2.1e-07	0.0289011	0.163678	0.0385	0.0223	0.0819413	0.0199543	2.7e-05	No
rs2780243	9	120730928	T	C	0.556957	0.0103671	0.00178285	6.07e-09	22.9893	1.02e-05	-0.0196	9.33e-13	0.00408381	0.0021	-0.00397749	0.640593	0.0076	0.3441	0.050246	0.00939895	6e-08	No
rs182558	16	81416699	C	A	0.0864624	0.018447	0.00317276	6.09e-09	4.45459	0.10782	-0.0172	0.0002204	0.00935523	0.00011	0.053023	0.000197	0.0211	0.08543	0.0382323	0.0165716	0.021	No
rs7703141	5	116551117	T	G	0.73963	0.0122287	0.00210343	6.11e-09	0.12892	0.937573	-0.0085	0.005251	0.00824382	3e-07	0.0194499	0.0447631	0.0101	0.2431	0.0393686	0.0106422	0.00031	No
rs56007817	4	46583433	A	G	0.679192	0.0114225	0.00196539	6.18e-09	0.290914	0.864627	-0.01	0.0005701	0.00713953	2.4e-06	0.0183777	0.0439653	0.0272	0.0008437	0.0332767	0.0099863	0.0011	No
rs190892797	7	14667600	A	C	0.018141	0.0402801	0.00693608	6.35e-09	1.09469	0.578483	-0.0399	0.0001633	0.0254844	7.8e-07	0.0269959	0.432874	0.0211	0.5137	0.179431	0.0351467	2.8e-07	No
rs2454951	5	176362137	T	C	0.260449	0.0119978	0.00206605	6.36e-09	1.22246	0.542684	-0.0135	8.03e-05	0.00683632	1.6e-05	0.0208423	0.027039	-0.004	0.6347	0.0114992	0.0105424	0.29	No
rs1743218	14	91440289	T	G	0.642451	0.0109973	0.00189387	6.37e-09	2.59423	0.27332	-0.0133	6.58e-06	0.00641348	1.8e-05	0.0115798	0.191051	0.0057	0.5115	0.0548152	0.00987044	1.1e-08	No
rs10486064	7	13987644	C	T	0.860154	0.0154118	0.00265689	6.6e-09	0.674853	0.713604	-0.015	0.0002041	0.00966567	1.5e-06	0.0156632	0.224023	0.0139	0.2493	0.0198825	0.0133594	0.17	No
rs72667418	8	105288229	T	C	0.1229	0.0159385	0.00275047	6.84e-09	4.19594	0.122705	-0.0212	8.9e-07	0.00842144	0.00012	0.0221734	0.0945192	0.0057	0.6495	0.0607672	0.0141753	2.7e-05	No
rs6949766	7	108246920	T	C	0.504905	0.0108548	0.00187419	6.97e-09	2.41477	0.298978	-0.0042	0.1201	0.00806686	5.4e-09	0.0156585	0.0605062	0.0114	0.1336	0.0332426	0.00929393	0.00041	No
rs10085839	7	131570695	G	T	0.240389	0.0125501	0.00216758	7.04e-09	1.78539	0.40955	-0.0115	0.0005186	0.00798054	1.8e-07	0.00434092	0.666194	0.0169	0.05052	0.0333493	0.0108569	0.0011	No
rs57640529	17	32295633	T	C	0.301504	0.0112801	0.00194861	7.09e-09	12.3308	0.00210089	-0.0183	7.85e-10	0.00520729	0.00065	0.00487391	0.596454	-0.0004	0.9634	0.027892	0.0101169	0.0072	No
rs34972832	16	11198938	G	A	0.807195	0.0135514	0.00234268	7.27e-09	0.208862	0.900837	-0.0108	0.001322	0.008871	3.6e-07	0.0139941	0.210634	0.0085	0.3905	-0.00242681	0.0117666	0.93	No
rs114494299	3	71632743	T	C	0.976806	0.0347332	0.00601627	7.78e-09	4.24335	0.119831	-0.0412	2.15e-05	0.0169217	0.00018	0.0883361	0.00181522	0.0444	0.1236	0.0445591	0.0306602	0.11	No
rs10962279	9	16103030	C	T	0.217782	0.0131807	0.00228538	8.05e-09	3.88198	0.143562	-0.0069	0.04061	0.0101459	1.2e-09	0.00140327	0.892524	0.0043	0.6592	0.00248665	0.0112313	0.89	No
rs328380	16	73884655	C	T	0.48055	0.0104472	0.00181167	8.09e-09	4.9733	0.083188	-0.0134	6.95e-07	0.00604775	3.7e-05	0.00655925	0.436512	-0.0009	0.9038	-0.00137119	0.00930945	0.84	No
rs628224	11	31819174	G	A	0.843977	0.0147733	0.00256311	8.22e-09	4.35027	0.113593	-0.0133	0.0003735	0.0103119	7.2e-08	-0.00297097	0.795731	0.0065	0.5466	0.0461201	0.0128189	0.00056	No
rs4877387	9	81679875	C	T	0.716511	0.0113016	0.00196083	8.23e-09	21.3126	2.36e-05	-0.0215	1.48e-12	0.00421899	0.0044	0.000319	0.972874	0.0108	0.208	0.0364315	0.010324	0.00045	No
rs6458602	6	48085108	T	A	0.721465	0.0116163	0.00201573	8.27e-09	2.79626	0.247058	-0.0121	4.45e-05	0.00605949	8.2e-05	0.0261934	0.00530591	0.0122	0.147	0.0190207	0.0103253	0.07	No
rs10770587	12	20143133	C	A	0.485356	0.0106422	0.00184896	8.62e-09	0.260746	0.877768	-0.007	0.008547	0.00699134	3.3e-07	0.0177086	0.0352192	0.0183	0.01912	0.0119796	0.00933716	0.2	No
rs4284110	9	19478344	C	T	0.646867	0.0110122	0.00191331	8.63e-09	1.81652	0.403225	-0.0087	0.0021	0.00651373	7.3e-06	0.0270178	0.00221462	0.0238	0.003964	0.0122745	0.00970778	0.19	No
rs3963	6	55204017	T	C	0.367436	0.0109989	0.00191268	8.9e-09	0.107991	0.947436	-0.0079	0.005199	0.00725858	4.5e-07	0.0173294	0.0472357	0.0379	1.07e-06	0.0391697	0.00961193	5.8e-05	No
rs6508344	18	22646735	A	G	0.569108	0.0106473	0.00185354	9.23e-09	0.192705	0.908144	-0.0093	0.0006845	0.00650899	1.5e-06	0.0133478	0.110775	0.0171	0.02606	0.0443784	0.00937585	3.6e-06	No
rs9929613	16	24599316	A	G	0.261665	0.0121455	0.00211445	9.24e-09	3.7416	0.154001	-0.0111	0.000729	0.00881635	5.8e-08	-0.0018768	0.848485	0.0093	0.3344	0.0576495	0.0107863	6e-08	No
rs2243610	10	75601653	T	A	0.260266	0.012218	0.00212906	9.54e-09	2.91512	0.232803	-0.0042	0.1648	0.00905375	1.1e-08	0.0210077	0.0225678	0.0232	0.006803	0.0020892	0.0105728	0.93	No
rs495074	2	169687341	C	T	0.650274	0.0106897	0.00186416	9.79e-09	12.1853	0.00225936	-0.0174	7.33e-10	0.00497264	0.0017	0.00871772	0.320181	0.0056	0.4749	0.00823289	0.00968676	0.33	No
rs11047169	12	24104530	A	T	0.257422	0.0119471	0.00208566	1.01e-08	2.51749	0.28401	-0.0146	8.3e-06	0.00670878	2.9e-05	0.0138905	0.170858	-0.0088	0.3365	0.0402332	0.010665	8.5e-05	No
rs11065785	12	111412908	T	C	0.554654	0.010301	0.00179851	1.02e-08	6.63876	0.0361753	-0.0143	1.41e-07	0.0047877	0.0008	0.0175779	0.0394439	0.0044	0.572	0.0225047	0.00946102	0.018	No
rs28613158	8	112327978	G	C	0.63501	0.0108729	0.00190425	1.13e-08	0.0988711	0.951767	-0.0087	0.001759	0.00648523	1.8e-06	0.0173997	0.0431052	0.024	0.002105	0.0459712	0.00966817	8.6e-07	No
rs137882846	10	125018045	C	T	0.983373	0.0418575	0.00733837	1.17e-08	0.23269	0.890168	-0.0428	0.0005576	0.0278707	1.8e-06	0.0650901	0.0881637	NA	NA	0.0855051	0.0386213	0.033	No
rs6937206	6	40481174	T	C	0.440096	0.0103026	0.00180755	1.2e-08	5.02847	0.0809249	-0.0126	3.14e-06	0.00496891	0.00051	0.022908	0.00634556	0.0093	0.2218	0.0338232	0.00932898	0.00056	No
rs6108251	20	9048430	A	G	0.202321	0.0129571	0.00227414	1.22e-08	0.757114	0.684849	-0.0127	0.0001723	0.00813676	4.4e-06	0.0145322	0.158435	0.0141	0.1337	0.0624757	0.0116566	1.6e-07	No
rs772175	2	96944553	G	A	0.662352	0.0111915	0.00196518	1.23e-08	0.867473	0.648083	-0.0064	0.02365	0.00828466	3.6e-08	0.0115153	0.18212	0.0107	0.1687	0.0243421	0.00975207	0.013	No
rs4663309	2	239369556	G	A	0.247446	0.0120057	0.00210852	1.24e-08	2.44159	0.294996	-0.0138	1.12e-05	0.00631023	5e-05	0.0173797	0.0870763	0.0106	0.2367	0.0236127	0.0107376	0.028	No
rs6457808	6	35143465	T	G	0.017989	0.0402232	0.00707545	1.31e-08	5.33015	0.0695941	-0.0114	0.2556	0.0327094	2.8e-10	0.0266533	0.33235	0.108	0.0005242	0.166066	0.034868	1.4e-06	No
rs11780710	8	31169385	G	T	0.489115	0.0102873	0.00180994	1.32e-08	2.7756	0.249624	-0.0121	6.75e-06	0.00537294	6.5e-05	0.0139192	0.100117	0.0209	0.006722	0.0236656	0.00930818	0.011	No
rs1939468	11	76240121	G	T	0.682225	0.0108937	0.00191719	1.33e-08	12.1445	0.00230596	-0.0175	1.71e-09	0.00487304	0.00059	0.00290297	0.742098	0.0048	0.5437	0.0154479	0.00995656	0.12	No
rs4849968	2	4730927	T	C	0.614294	0.0106786	0.00187979	1.34e-08	1.74295	0.418334	-0.0074	0.007381	0.00646555	3.7e-06	0.0260176	0.00225087	0.0043	0.5819	0.0064114	0.00948192	0.44	No
rs10182996	2	213404834	T	C	0.560451	0.00987093	0.0017384	1.36e-08	33.1413	6.36e-08	-0.0216	7.43e-16	0.00195303	0.14	0.00854921	0.308389	-0.0005	0.9495	0.064019	0.00929076	9.8e-12	No
rs35099536	6	9516653	A	C	0.915135	0.0188164	0.00331436	1.37e-08	2.81351	0.244937	-0.0102	0.038	0.012137	8.3e-07	0.0483784	0.00130716	0.0088	0.5139	0.0350651	0.0168289	0.034	No
rs1081071	5	158381663	C	T	0.389938	0.010753	0.00189509	1.39e-08	2.3057	0.315736	-0.0107	0.0006044	0.00760226	2.4e-07	0.00218728	0.798217	0.0161	0.04141	0.0149676	0.00950279	0.14	No
rs77791228	16	50161297	G	A	0.840858	0.0143217	0.0025255	1.42e-08	2.95363	0.228364	-0.0159	4.3e-05	0.00870473	2.5e-06	0.00391199	0.752459	0.0068	0.5748	0.0280298	0.0127164	0.021	No
rs11886864	2	220156531	A	G	0.831791	0.0136487	0.00240875	1.46e-08	10.3686	0.0056039	-0.0213	5.09e-09	0.00601047	0.00068	0.00754736	0.531771	0.0358	0.00154	0.0851851	0.0123421	4.7e-12	No
rs60194422	2	211137411	A	G	0.444631	0.0101615	0.00179374	1.47e-08	13.136	0.0014046	-0.0166	6.79e-10	0.00449754	0.0011	0.00335516	0.69076	0.0154	0.04279	0.012364	0.00933428	0.2	No
rs3770214	2	219508988	T	C	0.394178	0.010865	0.00192016	1.53e-08	2.30175	0.316361	-0.0048	0.08554	0.00828865	5.5e-09	0.00933325	0.276614	0.0229	0.003633	0.0566929	0.00941685	7.6e-09	No
rs8091180	18	77164243	G	A	0.434643	0.0106847	0.00189768	1.8e-08	4.85692	0.0881724	-0.0059	0.03378	0.00814849	2.1e-09	-0.00178652	0.83235	0.0201	0.01057	0.0274492	0.00936023	0.0017	No
rs28849840	12	50703384	G	A	0.649359	0.0112182	0.00199285	1.81e-08	6.8843	0.0319958	-0.0025	0.3911	0.00911651	1.3e-10	0.00378138	0.66957	0.0035	0.6875	0.0211045	0.00974266	0.04	No
rs11199266	10	122061612	G	A	0.361128	0.0108065	0.00192016	1.82e-08	2.81369	0.244915	-0.01	0.0002679	0.00717577	5.4e-07	0.00135395	0.875821	0.0026	0.7361	0.0582045	0.00968537	1.2e-09	No
rs2233701	8	26365716	T	C	0.103846	0.0163383	0.00290464	1.86e-08	5.9245	0.0517025	-0.0223	3.72e-07	0.00722074	0.001	0.0272659	0.0323266	-0.0023	0.8474	0.0586113	0.0151983	3.2e-05	No
rs934235	2	105661013	G	A	0.461745	0.0103901	0.00184766	1.87e-08	0.892956	0.639878	-0.0092	0.0007538	0.00662522	8.2e-07	0.00713501	0.393551	0.0197	0.01004	0.0331257	0.00926143	0.0003	No
rs4766818	12	117392105	G	A	0.133865	0.0147242	0.00262044	1.92e-08	15.8438	0.000363	-0.0249	5.52e-10	0.00694836	0.00043	-0.00699774	0.571597	0.0044	0.681	0.0201278	0.013624	0.11	No
rs7536458	1	118864602	G	T	0.26216	0.0121435	0.00216367	1.99e-08	8.70416	0.01288	-0.0005	0.8885	0.0102148	1.2e-10	0.0143494	0.133353	0.0169	0.0533	0.0507455	0.0105041	7.6e-07	No
rs7702377	5	106408072	C	T	0.506428	0.0101906	0.00181602	2.01e-08	2.30506	0.315837	-0.0116	1.54e-05	0.00588289	3.6e-05	0.0111852	0.180214	0.0257	0.0006949	0.0391437	0.00934049	8e-05	No
rs6539267	12	106785554	C	T	0.298816	0.0111097	0.00198052	2.03e-08	2.30238	0.316261	-0.0128	1.53e-05	0.006156	6.4e-05	0.0155085	0.093588	-0.0011	0.8887	0.00147211	0.010132	0.85	No
rs7235304	18	45896150	A	C	0.774069	0.0123822	0.00220822	2.05e-08	6.41886	0.0403797	-0.0136	3.03e-05	0.0082101	9.4e-07	-0.00600764	0.556541	0.0042	0.6605	0.0379731	0.0111737	0.00051	No
rs79523547	2	54366881	G	C	0.970238	0.0310554	0.00554667	2.16e-08	6.86224	0.0323506	-0.0154	0.07686	0.0216535	6.3e-07	0.120732	0.000186	0.0029	0.9203	0.0598704	0.0275356	0.033	No
rs13283166	9	121565950	A	G	0.909722	0.0174824	0.00312727	2.27e-08	9.88169	0.00714854	-0.0292	1.16e-08	0.00728384	0.0025	0.0254292	0.0936117	0.0171	0.258	0.0612259	0.0161783	0.0002	No
rs11131599	4	66383430	A	G	0.172935	0.0134744	0.00241413	2.38e-08	0.0987699	0.951815	-0.0109	0.001935	0.0087767	1.4e-06	0.0155515	0.136532	0.0007	0.9408	0.0187123	0.012271	0.14	No
rs116777637	2	54095288	A	G	0.982116	0.0384365	0.00688653	2.39e-08	3.52584	0.171543	-0.0265	0.00598	0.0295784	2.2e-08	0.00432921	0.872939	0.0234	0.3289	0.180831	0.0355756	2.7e-07	No
rs147190113	16	72360282	G	C	0.985964	0.0435367	0.00780218	2.4e-08	0.431147	0.806079	-0.0292	0.01107	0.030687	1.9e-07	0.051177	0.130621	-0.006	0.8626	0.113689	0.0398744	0.0039	No
rs7290417	22	23362423	A	G	0.12095	0.0154717	0.00277517	2.47e-08	2.83518	0.242297	-0.0191	8.52e-06	0.00783936	0.0001	0.0207739	0.105924	0.0015	0.9036	0.037332	0.0143085	0.0095	No
rs10118993	9	29625686	A	T	0.41902	0.0104317	0.00187192	2.51e-08	0.889521	0.640978	-0.0089	0.001676	0.0073009	5e-07	0.00655829	0.438156	0.0086	0.28	0.040516	0.00954058	2.1e-05	No
rs137892220	1	196320218	A	G	0.067777	0.020592	0.00369889	2.59e-08	2.92952	0.231134	-0.0125	0.01874	0.0156303	1.4e-08	0.00427319	0.787842	0.0336	0.02077	-0.00378314	0.0184009	0.87	No
rs6124969	20	45816277	T	C	0.364005	0.0105946	0.00190644	2.74e-08	0.163691	0.921414	-0.0091	0.001296	0.00647548	4.8e-06	0.0162768	0.0621026	-0.0015	0.848	0.0391557	0.00969297	3.2e-05	No
rs138429802	11	871030	G	A	0.906344	0.0176847	0.00318562	2.83e-08	0.263681	0.876481	-0.014	0.004215	0.0124074	4.6e-07	0.0167557	0.277296	0.0116	0.4328	0.0725588	0.0160119	9.1e-06	No
rs2425859	20	44921857	T	C	0.451688	0.00987762	0.00177914	2.83e-08	12.2724	0.00216308	-0.0134	6.52e-07	0.00382908	0.011	0.0325032	9.74e-05	0.0099	0.1994	0.0608859	0.00937706	3.5e-11	No
rs3819663	22	33965639	G	A	0.619231	0.0104629	0.00188477	2.84e-08	0.510711	0.774641	-0.0099	0.0004325	0.00620943	4.8e-06	0.0114069	0.185241	0.02	0.008707	0.0384675	0.00962688	3.5e-05	No
rs6898209	5	89944514	C	T	0.635164	0.0102714	0.00185089	2.87e-08	10.005	0.00672099	-0.0129	2.92e-06	0.0040723	0.0048	0.0334646	0.000152	0.0079	0.3276	0.00307891	0.00961058	0.8	No
rs78332833	4	41770126	A	G	0.92888	0.0203153	0.00366106	2.87e-08	2.89375	0.235304	-0.0099	0.1626	0.0149305	6.9e-08	0.0436456	0.0126777	0.0094	0.6659	0.0565677	0.0185302	0.0011	No
rs4237845	12	58302436	T	C	0.449659	0.010349	0.00186587	2.91e-08	0.569783	0.752096	-0.0069	0.01332	0.00733334	1.5e-07	0.00972528	0.248312	0.0232	0.002957	0.0443327	0.00933352	1.3e-06	No
rs10259620	7	27202289	A	G	0.213347	0.0123463	0.00222772	2.99e-08	0.0835949	0.959064	-0.0094	0.004434	0.00796122	2.6e-06	0.0197619	0.0369029	0.0097	0.2685	0.0623403	0.0113907	4.3e-08	No
rs79718433	17	31389475	G	A	0.771754	0.0122203	0.00220549	3.01e-08	0.120377	0.941587	-0.0088	0.00803	0.00854331	4.9e-07	0.0151639	0.139284	-0.0056	0.5331	0.049906	0.0111136	1e-05	No
rs7831044	8	5545090	A	C	0.184663	0.0134399	0.00242583	3.02e-08	9.64194	0.00805895	-0.0002	0.9521	0.0109097	2.1e-09	0.029884	0.00473238	0.0258	0.01045	0.0358392	0.0121124	0.0036	No
rs7304380	12	77880740	C	T	0.423923	0.0103305	0.00186493	3.04e-08	0.918689	0.631698	-0.0065	0.01787	0.00655615	1.4e-06	0.0213192	0.0115321	0.0145	0.06641	0.0294969	0.00947152	0.0019	No
rs11992435	8	81526083	A	G	0.94233	0.0205682	0.0037136	3.05e-08	21.0279	2.72e-05	-0.0387	8.6e-12	0.00494961	0.088	0.0419849	0.0235814	0.0113	0.4945	0.0189695	0.0200775	0.36	No
rs13415627	2	13319521	G	T	0.806086	0.0130729	0.00236112	3.08e-08	4.54365	0.103124	-0.0107	0.001901	0.0095441	6.8e-08	-0.00523493	0.631888	0.0106	0.2884	0.0385472	0.0117182	0.0011	No
rs78523440	21	35233866	A	G	0.076474	0.0185981	0.00336032	3.12e-08	9.1979	0.0100624	-0.0285	1.83e-08	0.00872751	0.00093	0.0130412	0.402513	0.0242	0.06642	0.0474751	0.0175772	0.0062	No
rs6081121	20	1889858	G	A	0.379797	0.0103547	0.00187253	3.21e-08	1.66612	0.434717	-0.0115	4.97e-05	0.00573561	5.1e-05	0.0150398	0.0846603	0.0029	0.7242	0.0155442	0.00960457	0.079	No
rs11724252	4	159863158	A	G	0.341275	0.0103532	0.00187344	3.27e-08	11.9646	0.00252298	-0.017	2.84e-09	0.00392626	0.0075	0.0164356	0.0709921	0.0136	0.08818	0.0353769	0.00978284	0.0002	No
rs1454580	8	14982457	G	A	0.359662	0.010431	0.00188814	3.3e-08	2.72845	0.255579	-0.0123	1.09e-05	0.0056879	0.0001	0.0134424	0.126673	0.0047	0.5565	0.0185259	0.00969697	0.064	No
rs3754855	2	119608582	G	A	0.393549	0.0102604	0.00185717	3.3e-08	1.88113	0.390407	-0.0113	4.35e-05	0.00564182	7.6e-05	0.0163594	0.0574394	0.013	0.09009	0.0210725	0.00946361	0.034	No
rs595514	3	61748633	C	T	0.883791	0.0158788	0.00287677	3.4e-08	3.00176	0.222933	-0.0151	0.0004822	0.0108502	5.5e-07	0.000267	0.983631	0.0134	0.2467	0.0521329	0.0144092	0.0004	No
rs6763496	3	4375888	C	T	0.332669	0.0104366	0.00189389	3.57e-08	6.0833	0.047756	-0.0141	6.12e-07	0.00457134	0.0014	0.0190047	0.0288284	-0.0142	0.07527	0.0111214	0.00981949	0.28	No
rs8103658	19	46166360	T	A	0.645488	0.0105587	0.0019192	3.76e-08	0.718143	0.698325	-0.0104	0.0003587	0.00650111	6e-06	0.0105798	0.239776	0.0057	0.5062	0.000305019	0.00981883	0.99	No
rs146313932	11	63561515	T	C	0.07145	0.0190478	0.00346253	3.77e-08	12.5466	0.00188598	-0.0383	2.16e-09	0.00786576	0.0092	0.0329122	0.0689509	-0.0314	0.1279	0.0607592	0.0190194	0.0017	No
rs8007058	14	73360258	A	G	0.22628	0.011879	0.00216056	3.84e-08	8.99733	0.0111238	-0.0169	1.3e-07	0.00628695	0.00011	-0.0014407	0.888026	0.0126	0.1724	0.0477257	0.011121	2.1e-05	No
rs9914265	17	35238488	T	C	0.495179	0.010274	0.00186898	3.86e-08	1.71605	0.423999	-0.0054	0.04781	0.0076849	2.8e-08	0.00746883	0.374251	-0.0008	0.9209	0.0255717	0.00936448	0.011	No
rs10921669	1	194797981	C	A	0.514974	0.00974078	0.00177256	3.9e-08	12.5127	0.00191824	-0.0164	1.54e-09	0.00362569	0.0072	0.0124074	0.1392	0.0078	0.2938	0.0416544	0.00925369	3.2e-06	No
rs1469067	5	135687759	C	T	0.388415	0.0100307	0.00182654	3.98e-08	15.195	0.000502	-0.0173	3.26e-10	0.00430382	0.0025	0.00150224	0.861189	0.0117	0.1343	0.0150014	0.00949079	0.14	No
rs4789145	17	73135344	T	C	0.653683	0.010315	0.00187874	4.01e-08	8.03593	0.0179895	-0.0154	6.23e-08	0.00431007	0.0021	0.0148957	0.0981432	0.0073	0.3592	-0.00539974	0.00974928	0.6	No
rs10134101	14	50857632	A	G	0.962054	0.0257661	0.00469405	4.04e-08	3.82946	0.147381	-0.0269	0.0001348	0.0133888	0.00034	0.0697608	0.00144334	-0.0208	0.3003	0.11893	0.0243806	2.3e-06	No
rs56282717	7	150657095	G	A	0.755695	0.0115121	0.0020988	4.13e-08	8.38497	0.0151087	-0.017	5.56e-08	0.00584116	0.00053	0.00613091	0.547588	0.0156	0.08935	0.0787271	0.0108418	6.2e-13	No
rs55654919	3	187423650	A	C	0.867711	0.0146116	0.002664	4.14e-08	5.71501	0.0574118	-0.0192	1.23e-06	0.00791732	7.4e-05	0.00509484	0.668744	-0.0035	0.7689	-0.00267652	0.013668	0.88	No
rs5755950	22	36183988	T	C	0.093309	0.0170556	0.00311067	4.18e-08	4.51376	0.104676	-0.0228	1.85e-06	0.00867403	0.00021	0.017742	0.211395	0.0032	0.8196	0.0137873	0.0160233	0.32	No
rs2832496	21	31310759	A	T	0.288478	0.0111044	0.00202818	4.37e-08	0.116161	0.943574	-0.0094	0.001541	0.00711419	4.7e-06	0.0152343	0.101791	0.0084	0.3143	0.0118221	0.010315	0.24	No
rs8017719	14	84860549	A	G	0.632018	0.0100824	0.00184221	4.43e-08	8.8602	0.0119133	-0.0154	5.46e-08	0.00453104	0.0042	0.0176668	0.0379463	0.011	0.1538	-0.0050066	0.00963215	0.51	No
rs13256823	8	116942767	C	T	0.836031	0.0134588	0.00246079	4.52e-08	0.581379	0.747748	-0.0125	0.000649	0.00823086	2.1e-05	0.0225244	0.0377668	0.0371	0.0003818	0.0721075	0.0125343	6.5e-09	No
rs10511902	9	32323271	A	T	0.271247	0.0113727	0.00208046	4.59e-08	0.816434	0.664835	-0.0085	0.004527	0.00780947	4e-07	0.00719758	0.447381	0.0083	0.3313	0.0175804	0.0104451	0.083	No
rs76873624	4	162155450	C	A	0.913567	0.0178545	0.00326697	4.62e-08	0.949404	0.62207	-0.0183	0.0001944	0.010824	1.9e-05	0.0225599	0.142655	0.0193	0.1791	0.0832638	0.0165896	3.7e-07	No
rs10457224	6	97349255	C	T	0.691491	0.0111313	0.00203682	4.63e-08	6.07138	0.0480416	-0.0016	0.5821	0.00876701	4.9e-09	0.0199097	0.0278638	0.0107	0.1866	0.0247826	0.0100493	0.0076	No
rs2821085	1	47672288	T	G	0.234456	0.0116963	0.00214242	4.78e-08	1.96877	0.373669	-0.0112	0.0004074	0.00636228	8.9e-05	0.0272677	0.00651959	-0.0033	0.7205	0.0581342	0.0109287	1.5e-07	No
rs2271189	12	56494991	G	A	0.596038	0.00972213	0.00178338	4.99e-08	27.3824	1.13e-06	-0.0208	8.6e-14	0.00271644	0.039	0.00125194	0.882502	0.0155	0.05233	0.0824228	0.00946384	5.3e-18	No
rs663129	18	57838401	A	G	0.233205	0.0500218	0.00252835	4.06e-87	78.2825	1e-17	0.0091	0.003756	0.0341594	3.8e-98	0.075946	2.3e-15	0.0536	4.09e-09	0.262063	0.0109827	9.6e-126	No
rs7123283	11	122809055	C	T	0.525496	0.0219764	0.00167323	2.1e-39	43.3844	3.79e-10	-0.0553	4.72e-93	0.00797924	6.9e-09	0.0148259	0.0768617	0.0165	0.02753	0.0173359	0.0093417	0.058	Yes
rs889399	16	69556583	C	G	0.587578	0.0213429	0.00164103	1.13e-38	47.6007	4.61e-11	-0.0493	8.62e-74	0.00674003	2e-06	0.0266518	0.00149796	0.0236	0.002416	0.102335	0.00945985	9.2e-28	Yes
rs2378662	9	86707289	A	G	0.54259	0.021444	0.00166291	4.77e-38	39.6687	2.43e-09	-0.0423	4.56e-55	0.00840272	1.4e-09	0.0221774	0.00856209	0.0344	1.14e-05	0.0277259	0.00935194	0.0027	Yes
rs4979004	9	114309111	A	G	0.651148	0.0200289	0.00165444	9.8e-34	57.7338	2.91e-13	-0.05	2.2e-72	0.00499441	0.0012	0.0204576	0.020659	0.0125	0.1171	0.0493321	0.00974469	5.1e-07	Yes
rs11672103	19	9942810	C	T	0.445359	0.0198818	0.0016447	1.22e-33	46.1837	9.36e-11	-0.0409	4.62e-51	0.00697237	3.2e-07	0.0159303	0.0582707	0.0149	0.06159	0.0144133	0.00941507	0.093	Yes
rs6923490	6	105348705	C	T	0.771538	0.0229375	0.00191862	6.1e-33	55.6008	8.44e-13	-0.0617	2.36e-81	0.006707	6.3e-05	0.00735499	0.441339	0.0134	0.1474	0.0126922	0.0111228	0.23	Yes
rs454747	6	101055566	T	C	0.487135	0.0197045	0.00167052	4.12e-32	33.7244	4.75e-08	-0.0357	2.69e-40	0.00770948	3.5e-08	0.0277565	0.000886	0.0164	0.03263	0.0577634	0.00929357	6.4e-10	Yes
rs11042018	11	8649707	C	A	0.655985	0.0205994	0.00175215	6.53e-32	40.7223	1.44e-09	-0.0387	5.89e-44	0.00808039	2.2e-08	0.0144289	0.0990421	0.0267	0.000769	0.0788556	0.00976592	3.2e-16	Yes
rs10832021	11	13324530	A	G	0.713294	0.0208001	0.00176984	6.85e-32	61.9407	3.55e-14	-0.0472	1.13e-57	0.00661818	1.4e-05	0.000989	0.914228	0.0036	0.6729	0.0574534	0.0102404	1.2e-08	Yes
rs7585666	2	199616520	T	C	0.346892	0.0192762	0.00164891	1.43e-31	63.7538	1.43e-14	-0.0491	2.72e-67	0.00465022	0.0015	0.00695438	0.434371	0.0057	0.4897	0.0388613	0.00976551	9e-05	Yes
rs10056247	5	133898136	C	T	0.722497	0.0204848	0.00176249	3.16e-31	57.5951	3.11e-13	-0.0455	1.1e-53	0.00526029	0.0015	0.0267336	0.0053108	-0.0013	0.885	0.0723414	0.0103377	2.7e-12	Yes
rs11695021	2	199798653	T	C	0.658733	0.0191288	0.00165024	4.55e-31	64.7777	8.58e-15	-0.0494	4.51e-69	0.00438343	0.0023	0.00537727	0.534401	0.0075	0.3516	0.00247098	0.00973133	0.79	Yes
rs12607903	18	3817134	T	C	0.721416	0.0200007	0.00175454	4.21e-30	65.032	7.56e-15	-0.0466	2.84e-56	0.00579849	0.00038	0.0036811	0.679671	0.007	0.4163	0.0275808	0.0103831	0.0084	Yes
rs16860342	3	185652947	C	T	0.573588	0.0185255	0.00164199	1.6e-29	47.9422	3.89e-11	-0.0381	1.65e-44	0.00550974	3.4e-05	0.0200539	0.017223	0.0032	0.6831	0.0120672	0.00934265	0.15	Yes
rs73515952	6	105337451	T	G	0.936588	0.0364443	0.00325616	4.44e-29	68.3947	1.41e-15	-0.0867	3.4e-55	0.00897483	0.0018	-0.000195	0.992074	0.005	0.749	0.0150876	0.0191524	0.4	Yes
rs9758500	3	86910329	A	G	0.378509	0.0177065	0.00158964	8.13e-29	68.8353	1.13e-15	-0.0422	2.33e-53	0.00284605	0.057	0.0260502	0.0022611	0.0079	0.317	-0.00115358	0.00952464	0.82	Yes
rs10980947	9	114326927	T	C	0.868268	0.0252	0.00226269	8.27e-29	72.5012	1.81e-16	-0.0673	9.17e-66	0.00485743	0.015	0.000297	0.979043	0.0107	0.3333	0.0436819	0.0137852	0.0018	Yes
rs17785419	18	44765469	G	A	0.572782	0.0171342	0.00154723	1.67e-28	73.0939	1.34e-16	-0.0461	2.8e-66	0.00263411	0.072	0.00647518	0.443263	-0.0036	0.6347	0.0452164	0.0094093	1.7e-06	Yes
rs17268785	2	56592083	A	G	0.830702	0.0216432	0.00200279	3.21e-27	80.7877	2.87e-18	-0.0665	3.44e-61	0.00183177	0.44	0.0197996	0.0776265	0.0092	0.354	-0.00188772	0.0122832	0.93	Yes
rs12894936	14	100846991	T	C	0.267134	0.0185404	0.00173107	9.1e-27	71.966	2.36e-16	-0.0454	3.52e-52	0.00326454	0.076	0.0143571	0.129202	-0.0142	0.0958	0.0248193	0.0105065	0.023	Yes
rs10895141	11	101436741	A	C	0.329771	0.0181123	0.0016925	1e-26	58.5972	1.89e-13	-0.0398	3.53e-45	0.00447059	0.0021	0.0146928	0.0977125	-0.0156	0.04875	0.0167977	0.00987912	0.069	Yes
rs71494584	9	108932625	G	A	0.094212	0.0273322	0.00256624	1.73e-26	81.0688	2.49e-18	-0.079	3.93e-65	0.00171386	0.49	0.0152979	0.27111	-0.0023	0.8602	0.0384368	0.0159782	0.012	Yes
rs100537	1	165413644	G	A	0.534729	0.0161827	0.00152327	2.31e-26	83.4561	7.55e-19	-0.0507	8.64e-59	0.00223259	0.11	-0.00315887	0.70986	-0.0058	0.4397	0.0252508	0.00937922	0.0073	Yes
rs10804533	3	117555219	T	C	0.506268	0.015628	0.00148375	6.1e-26	86.8078	1.41e-19	-0.0516	1.68e-62	2.92e-05	0.93	0.013453	0.107568	0.0019	0.7948	0.0300294	0.00924995	0.001	Yes
rs1351623	4	104587977	C	T	0.83427	0.0215378	0.00207319	2.79e-25	82.5659	1.18e-18	-0.0549	3.42e-52	0.00410318	0.038	-0.00687568	0.533871	-0.0079	0.4473	0.00555679	0.0124904	0.8	Yes
rs3743266	15	60781513	C	T	0.333408	0.0174192	0.00168881	6.06e-25	66.1556	4.31e-15	-0.0405	7.67e-45	0.00398249	0.0055	0.00527782	0.564955	0.016	0.0573	-0.0112422	0.00987838	0.26	Yes
rs3961944	10	97852357	T	G	0.338743	0.016523	0.00165233	1.53e-23	80.9943	2.58e-18	-0.0415	2.79e-47	0.0030799	0.037	-0.00480908	0.587787	0.014	0.07825	0.016891	0.00979707	0.093	Yes
rs9403051	6	100194846	G	A	0.42645	0.0161027	0.00162999	5.13e-23	64.8625	8.23e-15	-0.0359	9e-41	0.00429091	0.0023	1.76e-05	0.998342	0.0006	0.9382	0.0320818	0.00935681	0.0008	Yes
rs2632401	4	95147055	C	G	0.595559	0.0157564	0.00160661	1.05e-22	71.8852	2.46e-16	-0.0374	3.34e-43	0.0025987	0.043	0.00566905	0.508207	0.0087	0.2606	0.016216	0.0094529	0.055	Yes
rs7896371	10	1729026	C	T	0.540203	0.0146483	0.00150378	2.02e-22	93.8416	4.19e-21	-0.0408	1.42e-49	-0.000273466	0.93	0.0120522	0.150651	0.0003	0.9702	0.00993715	0.00936459	0.34	Yes
rs1159619	6	126801144	A	C	0.452582	0.0145227	0.0015034	4.46e-22	107.013	5.79e-24	-0.0409	4.7e-53	0.000579984	0.54	-0.0163922	0.050188	0.0021	0.7815	-0.0257191	0.00931727	0.0046	Yes
rs34399458	6	56848842	T	C	0.172692	0.0212421	0.00222264	1.21e-21	55.1731	1.05e-12	-0.0431	9.4e-34	0.00806142	1.2e-05	-0.00956418	0.389602	0.0346	0.0005183	0.0590906	0.0122385	1.2e-06	Yes
rs10816376	9	108832851	C	T	0.177981	0.0189931	0.00199879	2.05e-21	91.6398	1.26e-20	-0.0507	3.19e-47	0.00136606	0.54	0.000428	0.969738	-0.0191	0.05688	0.0193267	0.0122153	0.13	Yes
rs11867780	17	49609158	C	T	0.70543	0.0155862	0.00164603	2.83e-21	83.4877	7.43e-19	-0.061	6.26e-73	-0.000596516	0.69	-0.00395273	0.658955	0.0011	0.8985	-0.0341596	0.0102975	0.0008	Yes
rs7034076	9	127333087	C	A	0.496582	0.0158769	0.00167724	2.91e-21	58.3675	2.12e-13	-0.033	6.69e-34	0.00587023	1.5e-05	-0.0104963	0.216009	0.0107	0.1679	0.0152266	0.0093645	0.11	Yes
rs6923177	6	77728255	G	A	0.204506	0.0181759	0.00193306	5.32e-21	78.7839	7.8e-18	-0.0451	1.23e-42	0.00219373	0.21	0.00754363	0.462056	0.0153	0.1089	0.0119566	0.0114772	0.38	Yes
rs13253935	8	4828306	T	C	0.376001	0.0155646	0.00167023	1.18e-20	57.924	2.64e-13	-0.0345	1.31e-35	0.00325133	0.019	0.0139607	0.106312	0.023	0.003216	0.0109832	0.00959684	0.3	Yes
rs246174	16	14379931	C	T	0.630554	0.0134874	0.00145275	1.63e-20	127.509	2.05e-28	-0.0448	3.11e-57	-0.00446161	0.0027	0.0119846	0.180185	-0.005	0.5228	0.0112716	0.00965264	0.22	Yes
rs6719208	2	156589051	C	G	0.72122	0.0151758	0.00163738	1.89e-20	110.83	8.58e-25	-0.0467	6.87e-51	-0.00154623	0.32	0.00111738	0.905897	0.0013	0.886	0.0224861	0.0102915	0.028	Yes
rs35697404	2	105865050	G	A	0.507802	0.0131611	0.00142791	3.05e-20	122.381	2.66e-27	-0.0422	6.58e-55	-0.00243723	0.061	-0.00310796	0.710753	0.0083	0.2922	0.00430989	0.00924542	0.71	Yes
rs4141153	7	41467946	A	G	0.803605	0.0155841	0.00175213	5.88e-19	132.681	1.54e-29	-0.0618	1.55e-57	-0.00491976	0.0063	-0.0144106	0.16978	-0.0128	0.1585	-0.0239123	0.0116662	0.039	Yes
rs6778080	3	49317338	C	T	0.73197	0.0149801	0.00169338	9.05e-19	107.318	4.97e-24	-0.0436	3.93e-46	-0.00148353	0.38	0.0057578	0.544807	-0.0014	0.8731	-0.0238403	0.0104438	0.014	Yes
rs768023	6	108876002	A	G	0.62768	0.0153903	0.00174658	1.23e-18	35.2806	2.18e-08	-0.029	6.73e-26	0.00494553	0.00027	0.0142471	0.0985394	0.0107	0.1679	0.0862245	0.00958383	1.9e-19	Yes
rs10485375	6	76340922	C	G	0.625806	0.0153566	0.00174433	1.32e-18	37.3293	7.84e-09	-0.0294	1.63e-26	0.00504874	0.00038	0.0133747	0.125899	0.0021	0.7944	0.0377559	0.00956223	0.00013	Yes
rs2627414	8	3767084	A	G	0.698279	0.0150276	0.0017152	1.93e-18	83.9185	5.99e-19	-0.0386	5.35e-40	0.00142387	0.34	0.000715	0.938011	-0.0059	0.4786	0.00622398	0.0101346	0.66	Yes
rs75389281	15	24159672	C	G	0.105986	0.0233852	0.00267287	2.15e-18	52.4176	4.15e-12	-0.0511	1.64e-30	0.00483445	0.034	0.0339927	0.0144804	0.0194	0.1317	0.0391024	0.0151057	0.0061	Yes
rs11265835	9	92216360	C	A	0.517476	0.0138865	0.00159623	3.33e-18	69.8253	6.88e-16	-0.0333	8.1e-36	0.0016827	0.23	0.0119177	0.154069	-0.0033	0.6645	0.0577421	0.00936182	5.1e-10	Yes
rs62000036	15	23803985	G	A	0.306863	0.0145533	0.00167443	3.58e-18	86.8707	1.37e-19	-0.0381	1.44e-39	-0.000179141	0.93	0.0174024	0.0488607	-0.0008	0.9171	0.0127423	0.0100965	0.21	Yes
rs2604265	9	76905178	G	A	0.736805	0.0156084	0.00180364	4.98e-18	74.1601	7.88e-17	-0.0383	6.04e-37	0.00185493	0.24	0.00709033	0.458268	0.0092	0.2934	0.0280115	0.0105507	0.0076	Yes
rs913588	9	7174673	A	G	0.517728	0.0129201	0.00153404	3.69e-17	97.7183	6.04e-22	-0.0357	1.27e-39	-0.00125946	0.33	0.0215653	0.00993802	0.0014	0.8524	0.00469175	0.00927791	0.55	Yes
rs2959084	11	46078656	G	A	0.292314	0.0156618	0.00187506	6.67e-17	45.5852	1.26e-10	-0.0306	6.74e-26	0.00587572	6.8e-05	-0.00738872	0.417287	-0.0003	0.9757	0.0104498	0.010181	0.28	Yes
rs9548881	13	40262760	C	T	0.658838	0.0146481	0.00176902	1.23e-16	45.8176	1.12e-10	-0.0304	3.72e-27	0.00410782	0.0036	0.00625245	0.47906	0.0146	0.06701	-0.00457313	0.00980348	0.65	Yes
rs12915845	15	89042467	T	C	0.424632	0.0124074	0.00150735	1.85e-16	122.847	2.11e-27	-0.038	3.62e-45	-0.00284253	0.053	0.00580326	0.494319	-0.0022	0.7737	-0.000731994	0.00942221	0.88	Yes
rs732310	19	1833338	G	T	0.471295	0.0129326	0.0015834	3.14e-16	84.478	4.53e-19	-0.0348	5.15e-37	0.000756852	0.69	0.00401673	0.630552	-0.0015	0.8479	-0.0634455	0.00931625	3.8e-12	Yes
rs7015177	8	4559881	G	C	0.53394	0.0123214	0.00152452	6.36e-16	110.222	1.16e-24	-0.036	4.97e-41	-0.00231552	0.11	0.0150923	0.0706253	-0.0076	0.3295	0.00835152	0.00933617	0.33	Yes
rs145104523	21	40644110	C	T	0.859278	0.0190768	0.00236929	8.16e-16	65.9969	4.67e-15	-0.0466	7.29e-32	0.00287538	0.14	0.00606131	0.65216	-0.0106	0.3566	0.0637703	0.0134567	2.3e-06	Yes
rs2798225	4	3267342	G	A	0.429437	0.0135937	0.00168952	8.56e-16	42.1213	7.14e-10	-0.028	3.63e-25	0.0035569	0.013	0.0147956	0.0788933	0.0052	0.4982	0.0257594	0.0093759	0.0092	Yes
rs2542420	8	140645701	G	C	0.46654	0.0131395	0.00164053	1.15e-15	64.1704	1.16e-14	-0.032	2.97e-31	0.00230083	0.095	0.00249362	0.767413	-0.002	0.7958	0.0219538	0.00939193	0.025	Yes
rs7215990	17	6034831	A	G	0.245346	0.0151175	0.00191121	2.58e-15	66.7984	3.13e-15	-0.0364	3.06e-31	0.00302201	0.066	-0.00522476	0.599421	0.0076	0.3935	0.0202612	0.0108921	0.05	Yes
rs17465108	8	78121878	T	G	0.285665	0.0126697	0.00160795	3.29e-15	150.57	2.01e-33	-0.0419	3.84e-46	-0.00564127	0.00015	0.0194147	0.0346258	0.0049	0.5632	-0.000325698	0.0102707	0.95	Yes
rs35894164	2	73537642	C	T	0.970634	0.0361393	0.00460651	4.32e-15	103.14	4.01e-23	-0.1065	1.3e-39	-0.0018225	0.76	-0.0285101	0.271897	-0.01	0.691	-0.054198	0.0274709	0.043	Yes
rs4071563	11	30336002	G	A	0.839004	0.0174687	0.00223371	5.26e-15	53.8589	2.02e-12	-0.0392	1.71e-27	0.0026424	0.13	0.0202196	0.0654365	-0.011	0.291	0.0239074	0.0126308	0.049	Yes
rs6933660	6	151803754	A	C	0.313561	0.0139627	0.00178828	5.82e-15	58.6308	1.86e-13	-0.0324	7.04e-29	0.00308926	0.043	-0.000234	0.979752	0.0093	0.247	0.011003	0.0100084	0.38	Yes
rs3750454	9	111801325	C	G	0.29486	0.0141643	0.00181426	5.85e-15	70.1644	5.81e-16	-0.0339	3.91e-31	0.00318422	0.042	-0.0108751	0.244082	-0.0048	0.5656	-0.0320628	0.0101766	0.0013	Yes
rs9406422	9	11426645	G	A	0.930928	0.0252914	0.00325127	7.31e-15	50.1373	1.3e-11	-0.0558	2.31e-26	0.0042759	0.12	0.0340302	0.0453628	0.0202	0.1657	-0.0186477	0.0183266	0.32	Yes
rs67451924	3	127867397	G	A	0.731534	0.0142736	0.00184135	9.07e-15	66.2988	4.01e-15	-0.0358	9.14e-31	0.0021131	0.17	0.00255024	0.782728	0.0266	0.001849	0.0192365	0.0104317	0.051	Yes
rs582780	3	172121443	G	A	0.424897	0.0132181	0.00170695	9.66e-15	34.694	2.93e-08	-0.0261	2.91e-21	0.00349964	0.014	0.0230461	0.00634103	0.0147	0.05449	0.00205887	0.00943192	0.81	Yes
rs73066267	2	209600219	G	A	0.891104	0.0206599	0.00267077	1.03e-14	49.687	1.62e-11	-0.0457	2.37e-26	0.00522332	0.029	0.0099978	0.441504	-0.0147	0.2409	0.00645863	0.0148074	0.65	Yes
rs883208	2	164512618	A	C	0.268974	0.0146282	0.0019063	1.67e-14	36.6375	1.11e-08	-0.0296	3.51e-22	0.00401414	0.011	0.0176072	0.0617718	0.0084	0.3403	0.0178538	0.0104887	0.093	Yes
rs865809	3	183997735	A	G	0.230416	0.0148601	0.00194945	2.48e-14	71.5997	2.83e-16	-0.0372	3.21e-31	0.00235062	0.14	-0.00741347	0.463966	-0.0005	0.9557	0.0620348	0.0110054	7.8e-09	Yes
rs7159392	14	61008596	C	T	0.624186	0.0107	0.00141665	4.25e-14	136.382	2.43e-30	-0.045	7.04e-60	-0.00687207	1.8e-06	-0.0152829	0.0773446	-0.0128	0.1061	-0.0302641	0.00960274	0.0016	Yes
rs2256464	11	77917305	C	A	0.844272	0.0170627	0.00229628	1.08e-13	63.8471	1.37e-14	-0.0403	4.16e-28	0.0037238	0.038	-0.0148043	0.211591	-0.0007	0.9488	0.0450482	0.012786	0.0003	Yes
rs2718272	7	74099677	A	C	0.391109	0.0123117	0.00166403	1.37e-13	68.0327	1.69e-15	-0.0302	4.73e-28	0.000477506	0.91	0.0256359	0.00350276	0.0056	0.4953	0.0652474	0.00949611	1.2e-11	Yes
rs4755720	11	43628749	C	T	0.392306	0.0123897	0.00168264	1.8e-13	66.7069	3.27e-15	-0.0309	2.53e-29	0.00153254	0.28	0.00244651	0.775724	-0.0165	0.03767	0.0754416	0.00953013	1.2e-15	Yes
rs60722019	2	203146783	A	G	0.112786	0.0195225	0.00265649	2e-13	55.6203	8.36e-13	-0.0445	3.62e-26	0.00484284	0.034	-0.00710478	0.607234	0.0167	0.1543	0.0730161	0.0145452	8.2e-07	Yes
rs1984870	3	24715135	G	T	0.534844	0.0105357	0.00143735	2.3e-13	179.739	9.34e-40	-0.0401	7.53e-50	-0.00565339	2.4e-05	-0.0107577	0.195397	-0.0072	0.3673	-0.0180428	0.00936037	0.081	Yes
rs72741381	15	64806561	A	G	0.06276	0.0249489	0.00341806	2.9e-13	41.3702	1.04e-09	-0.0512	1.99e-21	0.00473494	0.14	0.0509901	0.00267491	0.0024	0.874	0.0671055	0.0191489	0.00063	Yes
rs2659005	17	79218714	T	C	0.44079	0.0124016	0.00169956	2.94e-13	37.0278	9.11e-09	-0.0253	1.01e-20	0.00291744	0.042	0.0201644	0.0164672	0.0111	0.162	0.0287456	0.00939188	0.0016	Yes
rs8040272	15	24824016	G	A	0.122749	0.0179442	0.00247559	4.22e-13	58.556	1.93e-13	-0.0442	1.15e-26	0.00167021	0.44	0.020041	0.0994924	0.0025	0.8242	0.00484938	0.0141933	0.63	Yes
rs57433618	9	75874315	C	T	0.932644	0.0244144	0.00337304	4.55e-13	37.4884	7.24e-09	-0.0511	2.43e-20	0.00536283	0.057	0.0455676	0.00661348	-0.0069	0.6562	0.000953865	0.0185384	0.99	Yes
rs541689	6	54506752	C	G	0.327417	0.0129595	0.00180252	6.49e-13	44.1824	2.55e-10	-0.028	5.95e-23	0.00312091	0.036	0.0070602	0.433964	0.0058	0.4684	-0.0214394	0.0098581	0.028	Yes
rs62229372	21	37692507	C	T	0.873349	0.0174926	0.00244837	9.03e-13	79.1849	6.39e-18	-0.0488	2.37e-31	0.000788924	0.65	-0.0029247	0.819379	-0.0156	0.2059	-0.00229053	0.014134	0.9	Yes
rs112927956	16	24724001	C	T	0.958675	0.0304651	0.00426854	9.53e-13	33.7195	4.76e-08	-0.064	5.31e-20	0.00905493	0.0094	0.020942	0.299858	0.042	0.03998	-0.00133177	0.0235274	0.97	Yes
rs62507083	8	53842780	T	G	0.119559	0.0184146	0.00261183	1.78e-12	45.1945	1.54e-10	-0.0405	1.2e-22	0.00462943	0.022	0.000163	0.989844	-0.0141	0.2288	-0.00566283	0.0143231	0.57	Yes
rs17133695	5	111081490	C	G	0.03832	0.0311295	0.00444165	2.41e-12	46.3059	8.81e-11	-0.0709	6.24e-23	0.00745574	0.073	0.0200765	0.410327	-0.0416	0.04538	0.0472873	0.0242076	0.058	Yes
rs10832673	11	16736160	G	A	0.204176	0.0148964	0.00212682	2.49e-12	33.7674	4.65e-08	-0.0301	1.83e-19	0.00430248	0.018	0.014584	0.183521	0.0169	0.08039	0.0546615	0.0115307	2.1e-06	Yes
rs17207196	7	75101065	C	T	0.580149	0.0115992	0.00167916	4.92e-12	55.6123	8.39e-13	-0.0286	3.96e-24	0.000669679	0.51	0.0192183	0.022795	0.0084	0.2791	0.110755	0.00939245	2.2e-32	Yes
rs5753410	22	31376009	G	C	0.32446	0.012722	0.00184598	5.51e-12	37.5629	6.97e-09	-0.026	9.84e-20	0.00421402	0.004	-0.00268814	0.76766	0.0091	0.2612	-0.00214215	0.00994993	0.9	Yes
rs66747537	19	36220430	A	G	0.860123	0.0168481	0.0024461	5.67e-12	46.0432	1e-10	-0.0376	1.82e-22	0.00391381	0.053	0.00491591	0.68492	-0.0078	0.4711	-0.0214619	0.013438	0.12	Yes
rs2532718	10	117480864	C	T	0.580948	0.0114553	0.00169799	1.52e-11	46.3039	8.82e-11	-0.0259	1.44e-21	0.00171296	0.26	0.0174352	0.0370152	0.0146	0.05777	-0.00688843	0.00941996	0.41	Yes
rs707134	2	157214701	T	G	0.152572	0.0151413	0.00229001	3.8e-11	69.5102	8.05e-16	-0.0402	2.84e-27	0.000696525	0.79	0.0041601	0.731968	0.0249	0.01464	-0.000632242	0.0128327	0.97	Yes
rs8136272	22	49678782	T	A	0.269138	0.0120225	0.00183004	5.05e-11	87.8381	8.44e-20	-0.0354	5.7e-31	-0.00118731	0.57	0.00192355	0.843547	-0.0111	0.2171	0.00226351	0.0105652	0.88	Yes
rs2970610	1	44097530	C	T	0.675084	0.0112603	0.0017154	5.23e-11	114.097	1.68e-25	-0.0357	8.65e-36	-0.000871652	0.54	-0.0180541	0.042458	-0.0037	0.6479	-0.00583944	0.00984411	0.49	Yes
rs6439371	3	132610752	A	G	0.648085	0.011193	0.00173332	1.06e-10	67.6438	2.05e-15	-0.0296	2.72e-26	0.000550203	0.77	0.00453938	0.605659	-0.002	0.8113	0.0121804	0.0096913	0.2	Yes
rs6844340	4	104267254	G	T	0.710795	0.0121611	0.00188486	1.1e-10	36.8314	1e-08	-0.0259	8.52e-19	0.00305608	0.06	0.00914213	0.315309	0.0106	0.204	0.0479818	0.01022	2.9e-06	Yes
rs67753568	16	52285658	C	T	0.191661	0.0135302	0.0021168	1.64e-10	56.6614	4.97e-13	-0.0339	3.41e-23	0.000417626	0.66	0.0167738	0.117115	0.003	0.7527	-0.0403561	0.0117673	0.00049	Yes
rs11696968	20	37284447	G	T	0.758887	0.0120306	0.00189953	2.4e-10	80.2138	3.82e-18	-0.0339	1.06e-26	-0.00168394	0.28	0.0258476	0.00714562	0.0056	0.5236	-0.00151718	0.0109016	0.95	Yes
rs3136247	2	48013099	A	G	0.80736	0.0138245	0.00219963	3.28e-10	47.7817	4.21e-11	-0.0317	4.16e-20	0.00401109	0.021	-0.015727	0.165141	0.0131	0.183	-0.00806376	0.0116916	0.46	Yes
rs247524	5	110877352	G	A	0.278121	0.0113641	0.00183709	6.17e-10	79.4477	5.6e-18	-0.0325	5.45e-28	-0.000187354	0.93	-0.0031846	0.728392	0.0133	0.1101	0.00666041	0.0104427	0.57	Yes
rs914027	13	112185071	T	C	0.511221	0.0102259	0.00165472	6.42e-10	67.8328	1.86e-15	-0.0281	4.96e-25	-0.000430225	0.83	0.0114703	0.176384	0.0036	0.65	0.0699104	0.00931936	3e-14	Yes
rs9349203	6	41893323	A	G	0.549622	0.00984603	0.00159739	7.1e-10	138.497	8.43e-31	-0.0346	1.55e-38	-0.00222602	0.11	-0.0219833	0.00871144	-0.0024	0.7573	-0.0291235	0.00931063	0.0014	Yes
rs56082403	3	156797225	C	T	0.399692	0.00974766	0.00158488	7.73e-10	150.24	2.38e-33	-0.0365	1.14e-40	-0.00441337	0.0029	-0.00958052	0.260456	-0.0185	0.02079	-0.0343809	0.00948523	0.00025	Yes
rs4664602	2	153542585	T	C	0.828048	0.0133177	0.0021857	1.11e-09	80.3034	3.65e-18	-0.0393	7.99e-28	-0.00064534	0.69	-0.00106992	0.926471	-0.0097	0.3424	-0.0054369	0.0121989	0.61	Yes
rs2697964	1	14150709	T	C	0.842298	0.0140476	0.0023062	1.12e-09	53.7026	2.18e-12	-0.035	6.23e-22	0.00112992	0.56	0.0106222	0.364462	-0.0022	0.8308	0.0179627	0.0126873	0.22	Yes
rs11925800	3	18406938	C	T	0.616872	0.0106008	0.00178897	3.11e-09	35.6618	1.8e-08	-0.0231	1.47e-16	0.00362594	0.016	-0.00635978	0.458871	0.0062	0.4317	-0.00562887	0.00962676	0.51	Yes
rs4421216	6	128365434	G	A	0.818586	0.0129059	0.00218657	3.58e-09	56.863	4.49e-13	-0.0339	8.6e-22	0.000386042	0.85	0.015598	0.158815	0.0101	0.3281	-0.0220443	0.0119991	0.074	Yes
rs59459277	3	24210535	G	A	0.10931	0.0161437	0.00273629	3.64e-09	54.5761	1.41e-12	-0.0412	1.62e-21	0.00260547	0.27	-0.00768681	0.579873	-0.0027	0.8233	-0.0125688	0.0149351	0.49	Yes
rs11240695	1	204158132	A	C	0.247113	0.0115079	0.00196162	4.45e-09	59.3125	1.32e-13	-0.0301	1.38e-22	0.000961573	0.45	-0.00426962	0.662354	-0.0096	0.2877	-0.0093916	0.0107225	0.42	Yes
rs62342064	4	104665972	C	T	0.859122	0.0137569	0.0023718	6.62e-09	106.493	7.5e-24	-0.0508	6.39e-32	-0.00253891	0.22	-0.0146698	0.274294	-0.0011	0.9294	-0.0218087	0.0136102	0.13	Yes
rs2770957	5	180656734	G	C	0.214449	0.0119814	0.00206681	6.75e-09	53.8009	2.08e-12	-0.0308	3.76e-21	0.00125968	0.35	-0.00413437	0.689323	-0.0099	0.2879	0.041764	0.0112855	0.00031	Yes
rs2936550	12	47870741	A	G	0.878865	0.0147886	0.00257131	8.85e-09	71.7365	2.65e-16	-0.0412	1.28e-24	0.000824731	0.59	-0.0180527	0.15386	0.0301	0.009202	-0.0210147	0.0141825	0.14	Yes
rs1493155	4	28756656	T	C	0.246185	0.0111092	0.00193212	8.94e-09	73.2984	1.21e-16	-0.032	2.57e-25	-0.000554184	0.82	-0.000229	0.981027	-0.0041	0.6462	-0.0206083	0.0107776	0.078	Yes
rs1590869	8	132028476	T	A	0.551423	0.00989432	0.001721	8.97e-09	54.2409	1.67e-12	-0.0253	9.89e-21	0.00177832	0.18	-0.0091393	0.275003	0.0096	0.2069	-0.0108985	0.0093344	0.22	Yes
rs12901917	15	54365127	G	A	0.620293	0.0102385	0.0017825	9.25e-09	36.1448	1.42e-08	-0.0229	1.06e-16	0.00279251	0.064	-0.00110622	0.897445	0.0123	0.1161	-0.00864302	0.00961103	0.44	Yes
rs9947458	18	31774002	T	A	0.515346	0.00947628	0.00170442	2.7e-08	44.3055	2.39e-10	-0.0234	5.44e-18	0.000765787	0.59	0.0129849	0.126565	0.0022	0.7804	0.00658699	0.00936619	0.53	Yes
rs484353	19	7891767	G	A	0.444859	0.00923598	0.00168492	4.22e-08	66.4353	3.75e-15	-0.0268	6.84e-23	-0.000222565	0.68	0.00634589	0.448505	0.0007	0.9332	-0.0219929	0.0093865	0.013	Yes
rs12895055	14	99712794	C	T	0.560942	0.00963532	0.00175795	4.23e-08	34.8196	2.75e-08	-0.0216	1.63e-15	0.00268781	0.048	-0.00489542	0.559965	0.0127	0.1001	0.0476748	0.00939947	4.1e-07	Yes

## Sheet: 9 MOBA+gSEM signals
Analysis	SNP	CHR	BP	effect_allele	other_allele	BETA	SE	P	EGG child BMI signal	EGG childBMI signal rsq	EGG child BMI signal p
gSEM	rs2229330	1	6649228	G	T	0.0247919	0.00371335	2.44825e-11	NA	NA	NA
gSEM	rs6685497	1	7031225	T	A	0.0127946	0.00185255	4.96825e-12	NA	NA	NA
gSEM	rs845204	1	7465286	A	G	0.016941	0.00203217	7.65965e-17	NA	NA	NA
gSEM	rs11121031	1	7883460	T	C	0.012581	0.00199369	2.78296e-10	NA	NA	NA
gSEM	rs302719	1	8490320	T	G	0.0169275	0.00180133	5.6021e-21	NA	NA	NA
gSEM	rs6670211	1	29576784	A	C	0.0120058	0.00181139	3.40412e-11	NA	NA	NA
gSEM	rs10524	1	41726473	C	T	0.0173321	0.00274096	2.5591e-10	NA	NA	NA
moba_bmi_e_8m	rs226064	1	44804161	A	G	0.0332039	0.00603497	3.7569e-08	NA	NA	NA
gSEM	rs2821085	1	47672288	T	G	0.0116963	0.00214242	4.77786e-08	NA	NA	NA
gSEM	rs643428	1	54728858	T	C	0.0182749	0.0018482	4.69588e-23	NA	NA	NA
gSEM	rs12140153	1	62579891	G	T	0.0331367	0.00321208	5.94966e-25	NA	NA	NA
moba_bmi_e_8m	rs670318	1	63727542	T	C	0.104022	0.0130985	1.99756e-15	NA	NA	NA
moba_bmi_d_6m	rs942861	1	65798843	G	A	0.0354477	0.00562137	2.86563e-10	NA	NA	NA
moba_bmi_d_6m	rs74082072	1	65970925	C	T	0.0506919	0.00918978	3.46577e-08	NA	NA	NA
moba_bmi_d_6m	rs2767486	1	65991203	G	A	0.119799	0.00733969	6.87227e-60	NA	NA	NA
moba_bmi_d_6m	rs17127776	1	66077805	G	A	0.0760915	0.0073764	5.99515e-25	NA	NA	NA
gSEM	rs1338188	1	67029862	T	C	0.0152746	0.0025313	1.59655e-09	NA	NA	NA
gSEM	rs12048727	1	71769465	A	G	0.0120921	0.00187474	1.11855e-10	NA	NA	NA
moba_bmi_f_1y	rs34020954	1	72742387	C	T	0.0505174	0.00734049	5.90065e-12	rs61765651	0.944768	9.503e-09
moba_bmi_k_7y	rs4650277	1	74993721	A	G	0.0612008	0.00739459	1.26911e-16	rs12042908	0.988618	2.765e-14
gSEM	rs17391694	1	78623626	T	C	0.0203351	0.00269086	4.1216e-14	NA	NA	NA
gSEM	rs6686531	1	87713613	A	G	0.0118772	0.0018606	1.73091e-10	NA	NA	NA
gSEM	rs7531045	1	97188559	A	C	0.0140432	0.00181297	9.48557e-15	NA	NA	NA
gSEM	rs10875131	1	98645192	A	G	0.017632	0.00244066	5.03762e-13	NA	NA	NA
moba_bmi_h_2y	rs41301283	1	110049457	A	G	0.0764461	0.0137746	2.86042e-08	rs41279738	0.274131	1.296e-08
gSEM	rs56018934	1	110060710	C	T	0.0229764	0.0037076	5.75091e-10	NA	NA	NA
moba_bmi_h_2y	rs663533	1	113128804	C	G	0.0371295	0.00679641	4.67864e-08	NA	NA	NA
gSEM	rs7536458	1	118864602	G	T	0.0121435	0.00216367	1.99444e-08	NA	NA	NA
gSEM	rs115126664	1	151002468	A	G	0.028208	0.00435295	9.16086e-11	NA	NA	NA
gSEM	rs12139953	1	153629755	G	A	0.0109611	0.00184499	2.8328e-09	NA	NA	NA
gSEM	rs12043212	1	155964698	G	A	0.0121718	0.00195463	4.75028e-10	NA	NA	NA
moba_bmi_g_16m	rs2031626	1	157059785	A	C	0.0380103	0.00675415	1.82621e-08	NA	NA	NA
moba_bmi_d_6m	rs6693754	1	163139984	C	T	0.0300457	0.00548166	4.22591e-08	NA	NA	NA
gSEM	rs10913213	1	176563260	G	C	0.0108603	0.00185232	4.5434e-09	NA	NA	NA
moba_bmi_l_8y	rs545608	1	177899121	C	G	0.10842	0.0100134	2.55035e-27	rs543874	0.994891	1.616e-15
gSEM	rs113173495	1	179737821	G	A	0.0160968	0.00257375	3.99549e-10	NA	NA	NA
gSEM	rs9970363	1	180575168	A	G	0.012718	0.00180211	1.69748e-12	NA	NA	NA
gSEM	rs78444298	1	184672098	G	A	0.0635433	0.00701003	1.25017e-19	NA	NA	NA
gSEM	rs4630087	1	187728389	A	G	0.0213916	0.00286835	8.79742e-14	NA	NA	NA
gSEM	rs10912256	1	188120914	G	A	0.017823	0.00265361	1.86139e-11	NA	NA	NA
gSEM	rs111304137	1	190475725	A	G	0.0375417	0.00600078	3.94635e-10	NA	NA	NA
gSEM	rs10921669	1	194797981	C	A	0.00974078	0.00177256	3.89999e-08	NA	NA	NA
gSEM	rs137892220	1	196320218	A	G	0.020592	0.00369889	2.59074e-08	NA	NA	NA
moba_bmi_d_6m	rs10494808	1	200089872	T	C	0.0493987	0.00543649	1.02282e-19	NA	NA	NA
gSEM	rs823154	1	205762406	C	T	0.0188146	0.0018194	4.59201e-25	NA	NA	NA
gSEM	rs12040029	1	213451958	T	C	0.0164757	0.00264701	4.83824e-10	NA	NA	NA
moba_bmi_f_1y	rs10494981	1	214721975	C	G	0.0628449	0.0107898	5.72954e-09	NA	NA	NA
moba_bmi_b_6w	rs75233715	1	221288313	T	A	0.0616166	0.0112201	3.98281e-08	NA	NA	NA
gSEM	rs2780790	1	242977333	C	T	0.0117854	0.00197757	2.52949e-09	NA	NA	NA
gSEM	rs7517340	1	243710190	T	C	0.0146142	0.00226089	1.02027e-10	NA	NA	NA
moba_bmi_k_7y	rs62104180	2	466003	G	A	0.135467	0.020373	2.94374e-11	NA	NA	NA
gSEM	rs10470001	2	495160	A	C	0.0237198	0.00337309	2.03477e-12	NA	NA	NA
moba_bmi_k_7y	rs1320336	2	650012	G	A	0.0811915	0.00981644	1.32862e-16	rs939584	0.95112	8.852e-26
gSEM	rs4849968	2	4730927	T	C	0.0106786	0.00187979	1.3411e-08	NA	NA	NA
moba_bmi_l_8y	rs7601586	2	6209081	A	G	0.0537992	0.00900023	2.26537e-09	NA	NA	NA
gSEM	rs4123550	2	6335511	G	A	0.0113661	0.00177603	1.5565e-10	NA	NA	NA
gSEM	rs13415627	2	13319521	G	T	0.0130729	0.00236112	3.08108e-08	NA	NA	NA
gSEM	rs564548	2	23837135	C	T	0.0138818	0.00210924	4.65993e-11	NA	NA	NA
moba_bmi_f_1y	rs6752378	2	25150116	A	C	0.0730692	0.00572966	3.00677e-37	rs11676272	0.983643	2.373e-21
moba_bmi_d_6m	rs2012704	2	28184766	T	A	0.0324625	0.0054256	2.18796e-09	NA	NA	NA
gSEM	rs6760186	2	29087274	T	C	0.0114264	0.00176984	1.07386e-10	NA	NA	NA
gSEM	rs6719507	2	29733801	G	A	0.0112249	0.00186575	1.78434e-09	NA	NA	NA
gSEM	rs72785601	2	32800522	T	C	0.0192662	0.00294604	6.16457e-11	NA	NA	NA
gSEM	rs13386862	2	45156324	G	A	0.0139002	0.00191041	3.43789e-13	NA	NA	NA
gSEM	rs116777637	2	54095288	A	G	0.0384365	0.00688653	2.3859e-08	NA	NA	NA
gSEM	rs79523547	2	54366881	G	C	0.0310554	0.00554666	2.15685e-08	NA	NA	NA
gSEM	rs77019884	2	56806378	C	T	0.0149709	0.0020617	3.83054e-13	NA	NA	NA
gSEM	rs13011472	2	57961602	C	G	0.0118727	0.00178345	2.79153e-11	NA	NA	NA
gSEM	rs887912	2	59302877	T	C	0.0160515	0.00194981	1.83585e-16	NA	NA	NA
gSEM	rs2539679	2	59856713	T	C	0.0211602	0.00224462	4.21564e-21	NA	NA	NA
gSEM	rs17006627	2	61389609	G	C	0.0173461	0.00212755	3.54735e-16	NA	NA	NA
gSEM	rs3770657	2	67630980	G	A	0.0170185	0.00201093	2.60661e-17	NA	NA	NA
gSEM	rs67711978	2	69699104	A	T	0.0147199	0.00228954	1.28261e-10	NA	NA	NA
gSEM	rs12713889	2	77225361	T	C	0.0156981	0.00202048	7.87845e-15	NA	NA	NA
gSEM	rs2861055	2	77716557	T	C	0.0133216	0.00209974	2.23314e-10	NA	NA	NA
gSEM	rs772175	2	96944553	G	A	0.0111915	0.00196518	1.23467e-08	NA	NA	NA
gSEM	rs934235	2	105661013	G	A	0.0103901	0.00184766	1.87252e-08	NA	NA	NA
gSEM	rs3754855	2	119608582	G	A	0.0102604	0.00185717	3.29903e-08	NA	NA	NA
gSEM	rs2361168	2	137403333	G	A	0.0121165	0.00176185	6.10581e-12	NA	NA	NA
gSEM	rs6733172	2	142360384	T	C	0.0266066	0.00215814	6.36488e-35	NA	NA	NA
gSEM	rs2890652	2	142959931	C	T	0.0140793	0.00241749	5.74715e-09	NA	NA	NA
moba_bmi_d_6m	rs6751837	2	148387381	C	T	0.0403627	0.00592912	9.92887e-12	NA	NA	NA
moba_bmi_c_3m	rs75790195	2	158148167	T	C	0.104801	0.0177255	3.37031e-09	NA	NA	NA
moba_bmi_d_6m	rs11900786	2	158508271	T	C	0.0907301	0.00870088	1.85353e-25	NA	NA	NA
moba_bmi_d_6m	rs59137532	2	160891552	A	C	0.0998345	0.0164002	1.14773e-09	NA	NA	NA
moba_bmi_f_1y	rs77439332	2	161208194	C	T	0.0546253	0.00867662	3.06034e-10	NA	NA	NA
gSEM	rs495074	2	169687341	C	T	0.0106897	0.00186416	9.79061e-09	NA	NA	NA
gSEM	rs79842954	2	175191505	C	T	0.0224685	0.00354454	2.31411e-10	NA	NA	NA
moba_bmi_c_3m	rs58631773	2	176195103	T	G	0.055551	0.00951887	5.35069e-09	NA	NA	NA
moba_bmi_d_6m	rs957875	2	179384417	T	C	0.0393432	0.0065643	2.05362e-09	NA	NA	NA
gSEM	rs10930931	2	181598525	C	G	0.0115964	0.00185254	3.85653e-10	NA	NA	NA
gSEM	rs9333289	2	187498107	T	C	0.0129803	0.0020003	8.63142e-11	NA	NA	NA
moba_bmi_d_6m	rs57250041	2	191508220	T	A	0.0469099	0.00858364	4.62818e-08	NA	NA	NA
gSEM	rs7569376	2	205385322	T	C	0.0145094	0.00224982	1.12508e-10	NA	NA	NA
gSEM	rs6713357	2	206090229	A	G	0.0111876	0.00182443	8.67171e-10	NA	NA	NA
gSEM	rs190572876	2	206972042	A	G	0.0623363	0.00424825	9.54163e-49	rs114670539	0.944028	3.157e-08
gSEM	rs60194422	2	211137411	A	G	0.0101615	0.00179374	1.47053e-08	NA	NA	NA
gSEM	rs10182996	2	213404834	T	C	0.00987093	0.0017384	1.36151e-08	NA	NA	NA
moba_bmi_d_6m	rs11889534	2	218393975	T	C	0.034872	0.00547694	1.92681e-10	NA	NA	NA
moba_bmi_d_6m	rs3796031	2	218712918	T	C	0.0313129	0.00554767	1.65814e-08	NA	NA	NA
gSEM	rs3770214	2	219508988	T	C	0.010865	0.00192016	1.52799e-08	NA	NA	NA
gSEM	rs11886864	2	220156531	A	G	0.0136487	0.00240875	1.45893e-08	NA	NA	NA
gSEM	rs4663309	2	239369556	G	A	0.0120057	0.00210852	1.2415e-08	NA	NA	NA
gSEM	rs3791482	2	240066870	G	A	0.0214671	0.00293252	2.47348e-13	NA	NA	NA
gSEM	rs4130357	3	1860457	A	G	0.0111066	0.00183911	1.54993e-09	NA	NA	NA
gSEM	rs6763496	3	4375888	C	T	0.0104366	0.00189389	3.57441e-08	NA	NA	NA
gSEM	rs2594994	3	11339960	T	A	0.0171974	0.00257305	2.33045e-11	NA	NA	NA
gSEM	rs3816058	3	13004851	T	C	0.0147101	0.00250269	4.1594e-09	NA	NA	NA
moba_bmi_d_6m	rs6804842	3	25106437	G	A	0.0299797	0.00543088	3.38563e-08	NA	NA	NA
gSEM	rs1402987	3	27057245	G	A	0.0120676	0.00183952	5.3747e-11	NA	NA	NA
gSEM	rs925649	3	37270864	T	C	0.0107379	0.00179358	2.1393e-09	NA	NA	NA
gSEM	rs1858740	3	38438372	C	T	0.0119918	0.00184057	7.25538e-11	NA	NA	NA
moba_bmi_f_1y	rs75098903	3	39320644	C	T	0.101677	0.0185945	4.548e-08	NA	NA	NA
gSEM	rs754635	3	42305131	G	C	0.0253815	0.00288761	1.4984e-18	NA	NA	NA
gSEM	rs1348252	3	42418752	C	T	0.0140255	0.00210812	2.87017e-11	NA	NA	NA
gSEM	rs72906474	3	47817007	G	T	0.0154151	0.00181175	1.76356e-17	NA	NA	NA
moba_bmi_d_6m	rs34136796	3	50337032	A	C	0.0312349	0.00552586	1.58128e-08	NA	NA	NA
gSEM	rs750510	3	50546340	T	C	0.0222179	0.00248613	4.00766e-19	NA	NA	NA
gSEM	rs3774604	3	53824136	C	T	0.0124911	0.00190253	5.18634e-11	NA	NA	NA
gSEM	rs2629881	3	59778271	T	C	0.0138091	0.00226369	1.05883e-09	NA	NA	NA
gSEM	rs815715	3	61264084	C	G	0.0196719	0.00186869	6.47801e-26	NA	NA	NA
gSEM	rs595514	3	61748633	C	T	0.0158788	0.00287677	3.39632e-08	NA	NA	NA
gSEM	rs538579	3	62711674	C	G	0.0124295	0.00200893	6.1274e-10	NA	NA	NA
gSEM	rs12489309	3	68565190	C	T	0.0104608	0.00179469	5.58551e-09	NA	NA	NA
gSEM	rs114494299	3	71632743	T	C	0.0347332	0.00601627	7.77718e-09	NA	NA	NA
gSEM	rs6794631	3	77543931	G	A	0.0135485	0.00194627	3.37217e-12	NA	NA	NA
moba_bmi_k_7y	rs1795443	3	77739718	A	G	0.0463364	0.00845379	4.226e-08	NA	NA	NA
gSEM	rs7426534	3	84462073	A	G	0.0144507	0.00199722	4.64091e-13	NA	NA	NA
gSEM	rs13078960	3	85807590	G	T	0.0211846	0.00236585	3.41752e-19	NA	NA	NA
gSEM	rs4858934	3	88224304	C	T	0.0311185	0.0027914	7.32339e-29	NA	NA	NA
gSEM	rs9846196	3	115104761	G	T	0.0147437	0.0018849	5.19875e-15	NA	NA	NA
gSEM	rs12053870	3	118302515	G	T	0.0108288	0.001785	1.30682e-09	NA	NA	NA
gSEM	rs114386472	3	131623609	A	T	0.0201828	0.00313088	1.14562e-10	NA	NA	NA
gSEM	rs7631156	3	131751628	A	G	0.0141958	0.00198991	9.75853e-13	NA	NA	NA
gSEM	rs9850555	3	137163620	A	T	0.0105638	0.00178344	3.1559e-09	NA	NA	NA
gSEM	rs4678416	3	138092747	G	A	0.0213566	0.00241483	9.23979e-19	NA	NA	NA
moba_bmi_k_7y	rs78425303	3	141300386	C	G	0.086603	0.0157763	4.032e-08	NA	NA	NA
gSEM	rs12107172	3	147134039	G	A	0.0188618	0.00262296	6.4306e-13	NA	NA	NA
moba_bmi_e_8m	rs62271373	3	150066540	T	A	0.077488	0.0133082	5.79482e-09	NA	NA	NA
gSEM	rs17424987	3	161475954	A	G	0.0212369	0.00355835	2.3991e-09	NA	NA	NA
moba_bmi_f_1y	rs9860851	3	168919295	A	G	0.0555353	0.0098871	1.94366e-08	NA	NA	NA
moba_bmi_f_1y	rs6769442	3	171565463	G	A	0.0382568	0.00680275	1.86883e-08	NA	NA	NA
moba_bmi_f_1y	rs12490258	3	172064494	T	C	0.0347052	0.00617773	1.93419e-08	NA	NA	NA
gSEM	rs7633995	3	180369750	G	A	0.0189366	0.00313635	1.56242e-09	NA	NA	NA
gSEM	rs55742087	3	185830488	C	T	0.0225372	0.00222316	3.76641e-24	NA	NA	NA
gSEM	rs55654919	3	187423650	A	C	0.0146116	0.002664	4.13877e-08	NA	NA	NA
gSEM	rs10001740	4	30866392	A	G	0.0177089	0.00188784	6.56381e-21	NA	NA	NA
gSEM	rs11733954	4	32226664	A	G	0.0144229	0.0019024	3.41746e-14	NA	NA	NA
gSEM	rs6845639	4	38716721	A	G	0.0115774	0.00188626	8.36919e-10	NA	NA	NA
gSEM	rs78332833	4	41770126	A	G	0.0203153	0.00366106	2.8725e-08	NA	NA	NA
gSEM	rs13111387	4	44495381	T	C	0.0132266	0.00185545	1.01473e-12	NA	NA	NA
moba_bmi_k_7y	rs10938398	4	45186139	A	G	0.0469204	0.0074582	3.15174e-10	rs12641981	0.995965	4.187e-08
gSEM	rs56007817	4	46583433	A	G	0.0114225	0.00196539	6.18007e-09	NA	NA	NA
gSEM	rs1106995	4	60208272	T	G	0.0117008	0.00196064	2.4043e-09	NA	NA	NA
gSEM	rs11131599	4	66383430	A	G	0.0134744	0.00241413	2.38457e-08	NA	NA	NA
gSEM	rs788860	4	82137639	T	A	0.0158955	0.00211126	5.1173e-14	NA	NA	NA
gSEM	rs13107325	4	103188709	T	C	0.0292465	0.0036992	2.65449e-15	rs13107325	1	3.513e-08
gSEM	rs17035311	4	106066293	C	A	0.0210048	0.00248012	2.4691e-17	NA	NA	NA
gSEM	rs59068084	4	113256737	T	G	0.0109267	0.0018617	4.37904e-09	NA	NA	NA
gSEM	rs28454448	4	115125392	A	G	0.0144645	0.00199725	4.41457e-13	NA	NA	NA
gSEM	rs4864201	4	130731284	T	C	0.0172532	0.00189894	1.03056e-19	NA	NA	NA
moba_bmi_c_3m	rs4975311	4	143500223	G	A	0.0457876	0.00620784	1.6338e-13	NA	NA	NA
moba_bmi_e_8m	rs72731580	4	145412105	T	C	0.0396601	0.00639834	5.7002e-10	NA	NA	NA
moba_bmi_d_6m	rs28544066	4	149778462	T	C	0.0546928	0.00693623	3.1434e-15	NA	NA	NA
gSEM	rs11724252	4	159863158	A	G	0.0103532	0.00187344	3.26989e-08	NA	NA	NA
gSEM	rs76873624	4	162155450	C	A	0.0178545	0.00326697	4.62496e-08	NA	NA	NA
gSEM	rs2029641	4	167440421	G	A	0.0113624	0.00179462	2.42966e-10	NA	NA	NA
moba_bmi_c_3m	rs1160705	5	25128668	C	T	0.0309887	0.00554051	2.23039e-08	NA	NA	NA
gSEM	rs27555	5	34929368	G	T	0.0126287	0.00193985	7.50624e-11	NA	NA	NA
gSEM	rs10058350	5	43141644	C	T	0.017435	0.00185387	5.21957e-21	NA	NA	NA
moba_bmi_d_6m	rs2033237	5	50596784	C	T	0.0341998	0.00594297	8.6818e-09	NA	NA	NA
moba_bmi_f_1y	rs458036	5	55816081	A	C	0.0377722	0.00652812	7.20527e-09	NA	NA	NA
gSEM	rs10059709	5	58525496	C	A	0.018842	0.00277892	1.19897e-11	NA	NA	NA
gSEM	rs298088	5	58994526	G	A	0.0134286	0.00195456	6.40112e-12	NA	NA	NA
gSEM	rs75556712	5	60606482	G	A	0.0154839	0.00250575	6.43768e-10	NA	NA	NA
gSEM	rs12654405	5	60950429	G	A	0.0130093	0.00212007	8.4489e-10	NA	NA	NA
moba_bmi_d_6m	rs61023343	5	63966957	C	A	0.0363555	0.00564066	1.15409e-10	NA	NA	NA
moba_bmi_f_1y	rs13165926	5	64039871	A	C	0.0463602	0.00685872	1.38644e-11	NA	NA	NA
gSEM	rs460799	5	66191971	G	A	0.0188009	0.00206188	7.62705e-20	NA	NA	NA
gSEM	rs6864091	5	75010002	T	C	0.0119802	0.00193291	5.71802e-10	NA	NA	NA
gSEM	rs7729225	5	77142829	A	G	0.0113895	0.00175419	8.42962e-11	NA	NA	NA
gSEM	rs72776467	5	77485128	C	G	0.0180015	0.00215886	7.52781e-17	NA	NA	NA
gSEM	rs6898209	5	89944514	C	T	0.0102714	0.00185088	2.86586e-08	NA	NA	NA
gSEM	rs7722718	5	92557899	A	T	0.0112678	0.00183756	8.68367e-10	NA	NA	NA
moba_bmi_e_8m	rs13158163	5	95626870	T	C	0.0641759	0.00623259	7.28115e-25	NA	NA	NA
moba_bmi_i_3y	rs1837269	5	95859144	C	T	0.0428624	0.00682635	3.4084e-10	NA	NA	NA
gSEM	rs4235642	5	103818412	A	G	0.0122013	0.00195861	4.67762e-10	NA	NA	NA
gSEM	rs7702377	5	106408072	C	T	0.0101906	0.00181602	2.00562e-08	NA	NA	NA
gSEM	rs12514413	5	107323866	C	T	0.0140266	0.00214279	5.91087e-11	NA	NA	NA
gSEM	rs10491334	5	110772404	T	C	0.0137834	0.00220213	3.87202e-10	NA	NA	NA
gSEM	rs7703141	5	116551117	T	G	0.0122287	0.00210343	6.11143e-09	NA	NA	NA
moba_bmi_d_6m	rs10519513	5	116840907	A	G	0.0449068	0.00680713	4.19469e-11	NA	NA	NA
moba_bmi_d_6m	rs10061190	5	128376600	T	C	0.0463687	0.00835813	2.89394e-08	NA	NA	NA
gSEM	rs1469067	5	135687759	C	T	0.0100307	0.00182653	3.98235e-08	NA	NA	NA
gSEM	rs740077	5	137760083	C	A	0.0167296	0.00212686	3.66501e-15	NA	NA	NA
gSEM	rs72788811	5	137996661	C	T	0.0136282	0.00215352	2.47782e-10	NA	NA	NA
moba_bmi_d_6m	rs17287315	5	141827033	G	A	0.0522287	0.00917831	1.26701e-08	NA	NA	NA
gSEM	rs6875288	5	144506078	G	A	0.0111353	0.00186264	2.25569e-09	NA	NA	NA
gSEM	rs58861317	5	149425788	C	T	0.0176971	0.00290766	1.15499e-09	NA	NA	NA
gSEM	rs4958573	5	152091739	G	A	0.0151555	0.00204777	1.35146e-13	NA	NA	NA
gSEM	rs7708584	5	153543466	A	G	0.0221722	0.00187577	3.065e-32	NA	NA	NA
moba_bmi_d_6m	rs31196	5	158300798	A	C	0.0306673	0.00544573	1.78715e-08	NA	NA	NA
gSEM	rs1349360	5	165901439	C	T	0.010959	0.00173621	2.7544e-10	NA	NA	NA
gSEM	rs1030191	5	166743702	A	C	0.01082	0.0018061	2.08825e-09	NA	NA	NA
gSEM	rs17526010	5	167304609	T	C	0.0134769	0.00197307	8.46591e-12	NA	NA	NA
gSEM	rs2053682	5	170599327	A	C	0.0148552	0.00195514	3.00674e-14	NA	NA	NA
gSEM	rs2454951	5	176362137	T	C	0.0119978	0.00206605	6.35635e-09	NA	NA	NA
gSEM	rs75050499	5	179740640	C	T	0.0111215	0.00188747	3.80927e-09	NA	NA	NA
gSEM	rs642102	6	6014302	G	A	0.0108382	0.00183318	3.37472e-09	NA	NA	NA
gSEM	rs1207791	6	8716129	A	G	0.0181792	0.00269164	1.43875e-11	NA	NA	NA
gSEM	rs35099536	6	9516653	A	C	0.0188164	0.00331436	1.36889e-08	NA	NA	NA
gSEM	rs201237	6	10020243	A	G	0.0132503	0.00198957	2.74062e-11	NA	NA	NA
gSEM	rs7756992	6	20679709	A	G	0.0135954	0.00194808	2.97554e-12	NA	NA	NA
gSEM	rs9466425	6	22645073	A	T	0.0146161	0.00212507	6.07152e-12	NA	NA	NA
gSEM	rs276362	6	27938235	A	C	0.0140975	0.00203076	3.86672e-12	NA	NA	NA
moba_bmi_i_3y	rs9266043	6	31318630	A	G	0.0441009	0.00719813	8.97078e-10	NA	NA	NA
gSEM	rs6457808	6	35143465	T	G	0.0402232	0.00707545	1.30899e-08	NA	NA	NA
gSEM	rs11752814	6	37781723	T	G	0.0155995	0.002594	1.81349e-09	NA	NA	NA
moba_bmi_c_3m	rs9394485	6	38254520	G	A	0.133294	0.0222111	1.95817e-09	NA	NA	NA
moba_bmi_d_6m	rs28360623	6	39003992	T	C	0.0651178	0.00628114	3.49623e-25	NA	NA	NA
moba_bmi_f_1y	rs2268647	6	39043178	T	C	0.0478145	0.00575352	9.53016e-17	NA	NA	NA
moba_bmi_d_6m	rs179269	6	39102619	G	A	0.0652703	0.00557467	1.15478e-31	NA	NA	NA
moba_bmi_e_8m	rs7768953	6	39136110	T	C	0.089223	0.0148406	1.83168e-09	NA	NA	NA
gSEM	rs6937206	6	40481174	T	C	0.0103026	0.00180755	1.1996e-08	NA	NA	NA
gSEM	rs9462881	6	43221909	C	T	0.0145781	0.00189111	1.27063e-14	NA	NA	NA
gSEM	rs1214769	6	43442651	C	A	0.0132238	0.00194059	9.47031e-12	NA	NA	NA
gSEM	rs6458602	6	48085108	T	A	0.0116163	0.00201573	8.27324e-09	NA	NA	NA
moba_bmi_k_7y	rs2076308	6	50791640	C	G	0.0604182	0.00936744	1.11993e-10	rs2076308	1	1.585e-12
gSEM	rs13211684	6	51175486	C	T	0.0199303	0.00197035	4.73452e-24	NA	NA	NA
gSEM	rs9464047	6	54119064	A	G	0.0280347	0.00429082	6.41849e-11	NA	NA	NA
moba_bmi_d_6m	rs9357851	6	55097163	T	C	0.042428	0.00639127	3.1703e-11	NA	NA	NA
moba_bmi_d_6m	rs209421	6	83523684	G	T	0.0551998	0.0061407	2.49115e-19	NA	NA	NA
moba_bmi_d_6m	rs12198480	6	84342600	C	T	0.033591	0.00585867	9.8349e-09	NA	NA	NA
gSEM	rs1179904	6	90322573	T	C	0.0146062	0.00231361	2.73421e-10	NA	NA	NA
gSEM	rs10457224	6	97349255	C	T	0.0111313	0.00203682	4.6279e-08	NA	NA	NA
gSEM	rs1906251	6	98560826	A	C	0.0134527	0.00191805	2.32057e-12	NA	NA	NA
moba_bmi_e_8m	rs7749433	6	100674799	C	A	0.0391919	0.00671805	5.41726e-09	NA	NA	NA
moba_bmi_k_7y	rs1336242	6	101199634	C	T	0.042623	0.00735247	6.74714e-09	NA	NA	NA
moba_bmi_f_1y	rs2764261	6	108927842	G	A	0.0350181	0.00595009	3.9732e-09	NA	NA	NA
gSEM	rs7753558	6	117523471	C	A	0.0125499	0.00197461	2.07561e-10	NA	NA	NA
moba_bmi_d_6m	rs10499088	6	119027955	C	T	0.0365992	0.00628094	5.64209e-09	NA	NA	NA
gSEM	rs1452991	6	141473363	A	G	0.0156293	0.00191712	3.56534e-16	NA	NA	NA
moba_bmi_e_8m	rs1293936	6	152017691	T	G	0.0337027	0.00577552	5.36476e-09	NA	NA	NA
moba_bmi_e_8m	rs282096	6	154263279	C	T	0.0335276	0.0059866	2.13816e-08	NA	NA	NA
gSEM	rs1912668	6	165152074	G	T	0.0106964	0.00180293	2.97774e-09	NA	NA	NA
gSEM	rs693437	6	165944280	G	A	0.0151284	0.00239168	2.52512e-10	NA	NA	NA
moba_bmi_f_1y	rs300132	6	166417218	G	C	0.0339292	0.00593623	1.09313e-08	NA	NA	NA
moba_bmi_c_3m	rs4721112	7	1889466	C	T	0.0320096	0.00560814	1.14517e-08	NA	NA	NA
gSEM	rs78091838	7	5354330	T	C	0.0167021	0.00275584	1.35605e-09	NA	NA	NA
moba_bmi_e_8m	rs10240765	7	13059992	G	A	0.0384177	0.00663325	6.96851e-09	NA	NA	NA
moba_bmi_c_3m	rs11973042	7	13529463	G	A	0.0447562	0.00774595	7.5591e-09	NA	NA	NA
gSEM	rs10486064	7	13987644	C	T	0.0154118	0.0026569	6.60457e-09	NA	NA	NA
gSEM	rs190892797	7	14667600	A	C	0.0402801	0.00693608	6.34814e-09	NA	NA	NA
gSEM	rs4504541	7	24289438	A	C	0.0158256	0.00206161	1.63707e-14	NA	NA	NA
gSEM	rs10259620	7	27202289	A	G	0.0123463	0.00222772	2.98875e-08	NA	NA	NA
gSEM	rs3847001	7	27564305	C	T	0.0117287	0.00191064	8.32361e-10	NA	NA	NA
gSEM	rs4723263	7	33194826	C	G	0.0132796	0.00184847	6.76506e-13	NA	NA	NA
moba_bmi_e_8m	rs2735154	7	38376797	G	C	0.0377994	0.00688843	4.07934e-08	NA	NA	NA
gSEM	rs3807563	7	50566390	C	T	0.0127718	0.00178858	9.28197e-13	NA	NA	NA
gSEM	rs73135161	7	72172185	T	C	0.0189299	0.00311854	1.2782e-09	NA	NA	NA
moba_bmi_d_6m	rs35493868	7	73039406	C	G	0.0655458	0.00672079	1.79639e-22	NA	NA	NA
gSEM	rs2302432	7	75614864	T	G	0.0288823	0.00474192	1.12315e-09	NA	NA	NA
gSEM	rs4727295	7	76636756	G	A	0.0160818	0.00254573	2.66451e-10	NA	NA	NA
gSEM	rs1852006	7	77829768	G	A	0.011764	0.00195346	1.72115e-09	NA	NA	NA
gSEM	rs10260232	7	78120735	T	C	0.0120671	0.00178464	1.36453e-11	NA	NA	NA
moba_bmi_d_6m	rs10954754	7	84131879	A	G	0.0444708	0.00777519	1.0679e-08	NA	NA	NA
gSEM	rs4418273	7	93046072	A	G	0.0163123	0.00208648	5.3628e-15	NA	NA	NA
gSEM	rs982692	7	93206613	C	T	0.0201922	0.00197246	1.3525e-24	NA	NA	NA
gSEM	rs6944123	7	103128824	T	G	0.0169681	0.00199882	2.08283e-17	NA	NA	NA
gSEM	rs262350	7	103420708	C	T	0.0139634	0.00188663	1.34914e-13	NA	NA	NA
gSEM	rs6949766	7	108246920	T	C	0.0108548	0.00187419	6.96718e-09	NA	NA	NA
gSEM	rs10225027	7	110036332	C	T	0.0104341	0.0017888	5.44423e-09	NA	NA	NA
gSEM	rs258994	7	110547182	C	T	0.0114247	0.0018956	1.67033e-09	NA	NA	NA
moba_bmi_f_1y	rs10251787	7	126842035	C	T	0.0357046	0.00647379	3.48281e-08	NA	NA	NA
gSEM	rs6979832	7	127856276	G	A	0.0120963	0.00189129	1.59698e-10	NA	NA	NA
gSEM	rs11556924	7	129663496	C	T	0.0119703	0.00181185	3.93113e-11	NA	NA	NA
gSEM	rs56920675	7	130408525	G	A	0.0358525	0.0046793	1.83165e-14	NA	NA	NA
moba_bmi_d_6m	rs12154627	7	130422934	T	C	0.0409486	0.0054103	3.77138e-14	NA	NA	NA
gSEM	rs10085839	7	131570695	G	T	0.0125501	0.00216758	7.04167e-09	NA	NA	NA
gSEM	rs273957	7	137600690	C	T	0.012665	0.00187652	1.48671e-11	NA	NA	NA
gSEM	rs13233916	7	138874416	C	G	0.0302285	0.00322412	6.87002e-21	NA	NA	NA
gSEM	rs62485368	7	140602060	G	A	0.0253423	0.00353027	7.04338e-13	NA	NA	NA
gSEM	rs56282717	7	150657095	G	A	0.0115121	0.0020988	4.1323e-08	NA	NA	NA
gSEM	rs62478569	8	4140139	A	G	0.013217	0.00207413	1.86164e-10	NA	NA	NA
gSEM	rs17336628	8	4302335	A	G	0.0262404	0.00320906	2.91008e-16	NA	NA	NA
gSEM	rs7831044	8	5545090	A	C	0.0134399	0.00242583	3.01889e-08	NA	NA	NA
gSEM	rs13256357	8	9979535	T	C	0.0198143	0.00234635	3.04768e-17	NA	NA	NA
gSEM	rs1454580	8	14982457	G	A	0.010431	0.00188814	3.30427e-08	NA	NA	NA
gSEM	rs34835556	8	15756109	T	G	0.0119237	0.00184347	9.92633e-11	NA	NA	NA
gSEM	rs7832399	8	25752918	T	C	0.0115072	0.00187708	8.76637e-10	NA	NA	NA
gSEM	rs2233701	8	26365716	T	C	0.0163383	0.00290464	1.85622e-08	NA	NA	NA
gSEM	rs1982441	8	28021769	T	G	0.0183246	0.00274944	2.64947e-11	rs62500888	0.0581209	6.91e-10
gSEM	rs11780710	8	31169385	G	T	0.0102873	0.00180994	1.31762e-08	NA	NA	NA
gSEM	rs881301	8	38332318	C	T	0.0119773	0.0018686	1.45756e-10	NA	NA	NA
gSEM	rs17313586	8	53156824	G	C	0.0190456	0.00235142	5.51353e-16	NA	NA	NA
gSEM	rs10095724	8	53739232	G	A	0.0154268	0.00190368	5.33288e-16	NA	NA	NA
gSEM	rs6994491	8	54131634	T	C	0.0149744	0.00240313	4.62783e-10	NA	NA	NA
moba_bmi_g_16m	rs2355595	8	64780939	T	C	0.0420903	0.006965	1.51165e-09	NA	NA	NA
gSEM	rs7824221	8	76571560	A	C	0.0191873	0.00234822	3.05891e-16	NA	NA	NA
gSEM	rs4735652	8	76847583	A	T	0.0244154	0.00200066	2.97205e-34	NA	NA	NA
gSEM	rs16907751	8	81375457	C	T	0.0217135	0.00311489	3.15024e-12	NA	NA	NA
gSEM	rs11992435	8	81526083	A	G	0.0205682	0.0037136	3.0485e-08	NA	NA	NA
gSEM	rs4961195	8	87501554	C	A	0.0169511	0.00183481	2.49628e-20	NA	NA	NA
gSEM	rs72667418	8	105288229	T	C	0.0159385	0.00275047	6.83949e-09	NA	NA	NA
gSEM	rs28613158	8	112327978	G	C	0.0108729	0.00190425	1.13099e-08	NA	NA	NA
gSEM	rs13256823	8	116942767	C	T	0.0134588	0.00246079	4.5177e-08	NA	NA	NA
gSEM	rs11781699	8	118863061	C	T	0.014121	0.00238604	3.25562e-09	NA	NA	NA
gSEM	rs118104429	8	137939667	A	C	0.0384558	0.00580658	3.52481e-11	NA	NA	NA
gSEM	rs13254582	8	143121547	T	G	0.0111832	0.00184983	1.48927e-09	NA	NA	NA
gSEM	rs10975933	9	6954557	C	G	0.0166223	0.00189219	1.5675e-18	NA	NA	NA
gSEM	rs2930713	9	7649442	T	G	0.0113972	0.00183329	5.07365e-10	NA	NA	NA
gSEM	rs10962279	9	16103030	C	T	0.0131807	0.00228538	8.04969e-09	NA	NA	NA
gSEM	rs4284110	9	19478344	C	T	0.0110122	0.00191331	8.63432e-09	NA	NA	NA
gSEM	rs2383156	9	20885240	G	A	0.011864	0.00186937	2.2025e-10	NA	NA	NA
gSEM	rs3118252	9	25115154	C	G	0.0126865	0.00188764	1.8071e-11	NA	NA	NA
gSEM	rs1935354	9	27822531	C	T	0.0122985	0.00190424	1.0575e-10	NA	NA	NA
gSEM	rs10118993	9	29625686	A	T	0.0104317	0.00187192	2.50782e-08	NA	NA	NA
gSEM	rs10511902	9	32323271	A	T	0.0113727	0.00208046	4.59189e-08	NA	NA	NA
gSEM	rs7037178	9	73895875	G	T	0.0125422	0.00170792	2.07999e-13	NA	NA	NA
gSEM	rs10869977	9	80457276	G	A	0.011104	0.00176731	3.32079e-10	NA	NA	NA
gSEM	rs4877387	9	81679875	C	T	0.0113016	0.00196083	8.23062e-09	NA	NA	NA
gSEM	rs4877599	9	83229483	T	C	0.0212387	0.00228978	1.76899e-20	NA	NA	NA
moba_bmi_d_6m	rs2378662	9	86707289	A	G	0.0383058	0.00543423	1.80219e-12	NA	NA	NA
gSEM	rs1187345	9	87299290	G	A	0.0138357	0.00185101	7.73969e-14	NA	NA	NA
moba_bmi_d_6m	rs10868561	9	89956566	G	A	0.0334025	0.00556741	1.97738e-09	NA	NA	NA
gSEM	rs9330454	9	92515514	A	G	0.011589	0.00173083	2.14759e-11	NA	NA	NA
moba_bmi_f_1y	rs10821143	9	96263813	C	G	0.0451981	0.00589986	1.84672e-14	NA	NA	NA
moba_bmi_d_6m	rs75614054	9	98275789	T	C	0.06139	0.00837263	2.2636e-13	NA	NA	NA
moba_bmi_c_3m	rs12343333	9	109620811	T	C	0.0349443	0.00589792	3.12594e-09	NA	NA	NA
moba_bmi_d_6m	rs10817580	9	117039222	A	G	0.034342	0.00609051	1.71431e-08	NA	NA	NA
moba_bmi_f_1y	rs1044531	9	117098650	T	C	0.0642555	0.00966371	2.94781e-11	NA	NA	NA
gSEM	rs957512	9	120405705	T	C	0.0181499	0.0019437	9.83708e-21	NA	NA	NA
gSEM	rs2780243	9	120730928	T	C	0.0103671	0.00178285	6.06695e-09	NA	NA	NA
gSEM	rs13283166	9	121565950	A	G	0.0174824	0.00312727	2.26647e-08	NA	NA	NA
gSEM	rs56794017	9	122655534	G	A	0.0133928	0.00183878	3.25237e-13	NA	NA	NA
moba_bmi_e_8m	rs7020491	9	128144477	C	T	0.0336357	0.00575746	5.15454e-09	NA	NA	NA
gSEM	rs2275241	9	129370576	A	G	0.0172793	0.00191035	1.49579e-19	NA	NA	NA
gSEM	rs10733682	9	129460914	A	G	0.0156462	0.00187538	7.24572e-17	NA	NA	NA
gSEM	rs117911387	9	130446836	A	G	0.0362679	0.00459965	3.1475e-15	NA	NA	NA
gSEM	rs12343000	9	131012256	C	T	0.0123582	0.00205883	1.94249e-09	NA	NA	NA
gSEM	rs78741089	9	131940745	G	C	0.0171024	0.00252091	1.16744e-11	NA	NA	NA
gSEM	rs11789898	9	136925663	G	T	0.0172025	0.00239071	6.22117e-13	NA	NA	NA
gSEM	rs7921891	10	2083682	A	G	0.0159894	0.00184447	4.36619e-18	NA	NA	NA
gSEM	rs12414768	10	2291059	G	A	0.0211484	0.0032723	1.02755e-10	NA	NA	NA
moba_bmi_l_8y	rs4279921	10	2668468	T	C	0.0494819	0.00847862	5.34429e-09	NA	NA	NA
gSEM	rs2066127	10	10026007	A	G	0.0129929	0.00178856	3.74506e-13	NA	NA	NA
gSEM	rs11257839	10	12546579	C	G	0.0116362	0.00199698	5.64678e-09	NA	NA	NA
gSEM	rs7910407	10	13563816	T	C	0.0119389	0.00193278	6.53076e-10	NA	NA	NA
gSEM	rs2675612	10	63523266	T	C	0.013374	0.00202247	3.77292e-11	NA	NA	NA
gSEM	rs10761758	10	65172747	A	T	0.0110242	0.00176399	4.11572e-10	NA	NA	NA
gSEM	rs5030938	10	70975916	T	C	0.0120644	0.0020215	2.40154e-09	NA	NA	NA
gSEM	rs3812696	10	72025954	G	A	0.0224096	0.00380645	3.92624e-09	NA	NA	NA
gSEM	rs2243610	10	75601653	T	A	0.012218	0.00212906	9.54066e-09	NA	NA	NA
gSEM	rs17399739	10	87490850	G	A	0.02985	0.00373034	1.22476e-15	NA	NA	NA
gSEM	rs56228675	10	87992875	C	T	0.0166799	0.00271096	7.61342e-10	NA	NA	NA
gSEM	rs10887580	10	88097626	A	G	0.0120058	0.00189489	2.36015e-10	NA	NA	NA
moba_bmi_c_3m	rs11190095	10	101201376	A	G	0.137922	0.0233703	3.5999e-09	NA	NA	NA
moba_bmi_d_6m	rs118170811	10	102366896	A	G	0.0680263	0.0110631	7.79992e-10	NA	NA	NA
gSEM	rs41310284	10	102447647	C	A	0.0289403	0.00316727	6.40171e-20	NA	NA	NA
gSEM	rs10883553	10	102635475	A	C	0.0138846	0.00176517	3.6657e-15	NA	NA	NA
gSEM	rs67771234	10	103842430	T	G	0.0129417	0.00208273	5.17122e-10	NA	NA	NA
gSEM	rs10786980	10	108673413	G	C	0.0115842	0.00185595	4.32943e-10	NA	NA	NA
gSEM	rs10885077	10	112759731	G	T	0.0127759	0.00203245	3.25832e-10	NA	NA	NA
gSEM	rs75387636	10	120278394	A	G	0.0298217	0.00461227	1.00804e-10	NA	NA	NA
gSEM	rs3847492	10	121585598	T	C	0.0174179	0.00219131	1.88612e-15	NA	NA	NA
gSEM	rs11199266	10	122061612	G	A	0.0108065	0.00192016	1.82407e-08	NA	NA	NA
gSEM	rs7077302	10	123676662	G	C	0.0249836	0.00304254	2.18583e-16	NA	NA	NA
gSEM	rs1001039	10	124947129	A	G	0.016799	0.00271504	6.11756e-10	NA	NA	NA
gSEM	rs137882846	10	125018045	C	T	0.0418575	0.00733837	1.1708e-08	NA	NA	NA
gSEM	rs845081	10	125224920	A	G	0.0116133	0.00184363	2.99319e-10	NA	NA	NA
gSEM	rs138429802	11	871030	G	A	0.0176847	0.00318562	2.83383e-08	NA	NA	NA
gSEM	rs10839974	11	8103353	T	C	0.0174149	0.00284386	9.14436e-10	NA	NA	NA
moba_bmi_c_3m	rs11022015	11	11766945	C	T	0.033127	0.00560698	3.459e-09	NA	NA	NA
moba_bmi_d_6m	rs7927865	11	12853841	G	A	0.0472043	0.0059514	2.16272e-15	NA	NA	NA
gSEM	rs424921	11	16885024	G	A	0.018035	0.00307917	4.71044e-09	NA	NA	NA
gSEM	rs4757638	11	18312953	A	G	0.011915	0.00186111	1.53282e-10	NA	NA	NA
moba_bmi_c_3m	rs117473235	11	26535881	C	T	0.118413	0.0215502	3.91318e-08	NA	NA	NA
moba_bmi_f_1y	rs17309874	11	27667236	A	G	0.0412368	0.00644181	1.53936e-10	rs56133711	0.904555	2.001e-10
moba_bmi_c_3m	rs72874467	11	27981992	T	C	0.0437653	0.00799903	4.46673e-08	NA	NA	NA
moba_bmi_h_2y	rs2933170	11	29135383	A	G	0.0445288	0.00767154	6.45907e-09	NA	NA	NA
gSEM	rs628224	11	31819174	G	A	0.0147733	0.00256311	8.22254e-09	NA	NA	NA
gSEM	rs3181269	11	33755956	C	T	0.0128833	0.00214624	1.94019e-09	NA	NA	NA
gSEM	rs10838462	11	45416657	T	C	0.0143079	0.00178591	1.13284e-15	NA	NA	NA
gSEM	rs12575721	11	46823681	C	T	0.0173392	0.00290451	2.37601e-09	NA	NA	NA
gSEM	rs28362947	11	57369008	G	C	0.0127212	0.00207706	9.0904e-10	NA	NA	NA
moba_bmi_f_1y	rs174530	11	61546592	G	A	0.0405488	0.00588167	5.42001e-12	NA	NA	NA
moba_bmi_e_8m	rs3017095	11	62178624	G	A	0.0434331	0.00610672	1.14078e-12	NA	NA	NA
gSEM	rs146313932	11	63561515	T	C	0.0190478	0.00346253	3.77387e-08	NA	NA	NA
moba_bmi_c_3m	rs10160596	11	65351364	A	G	0.0487736	0.00623339	5.09448e-15	NA	NA	NA
gSEM	rs7118897	11	68360680	G	A	0.01388	0.0021694	1.57361e-10	NA	NA	NA
gSEM	rs10796828	11	69490346	G	T	0.0165617	0.00196976	4.17058e-17	NA	NA	NA
gSEM	rs1939468	11	76240121	G	T	0.0108937	0.00191719	1.33049e-08	NA	NA	NA
gSEM	rs628730	11	84782537	C	T	0.0115525	0.00177679	7.93008e-11	NA	NA	NA
gSEM	rs1813212	11	89301382	A	G	0.0107422	0.00184274	5.56081e-09	NA	NA	NA
gSEM	rs540514	11	94159005	C	G	0.0126442	0.00195937	1.09501e-10	NA	NA	NA
gSEM	rs11225161	11	102070494	C	T	0.0228753	0.00343611	2.78844e-11	NA	NA	NA
gSEM	rs17564430	11	115043574	T	G	0.0226612	0.00201739	2.80891e-29	NA	NA	NA
moba_bmi_d_6m	rs7107575	11	122845406	C	T	0.0316746	0.00549484	8.19351e-09	NA	NA	NA
gSEM	rs10791154	11	131473175	G	C	0.010865	0.00186186	5.36043e-09	NA	NA	NA
gSEM	rs61910820	11	134581277	G	A	0.0148102	0.00237737	4.67435e-10	NA	NA	NA
gSEM	rs11571404	12	1041450	T	C	0.0234676	0.00228268	8.6112e-25	NA	NA	NA
gSEM	rs7306736	12	16915325	T	C	0.0120741	0.0018405	5.37277e-11	NA	NA	NA
moba_bmi_d_6m	rs2731602	12	19955649	A	G	0.0317095	0.00567591	2.31446e-08	NA	NA	NA
moba_bmi_c_3m	rs12230843	12	20105947	T	G	0.0431993	0.00549717	3.88866e-15	NA	NA	NA
moba_bmi_c_3m	rs7967455	12	20293797	A	G	0.0463959	0.00828872	2.175e-08	NA	NA	NA
gSEM	rs11047169	12	24104530	A	T	0.0119471	0.00208566	1.01487e-08	NA	NA	NA
gSEM	rs10771089	12	24588709	C	G	0.0140959	0.00181266	7.46432e-15	NA	NA	NA
gSEM	rs183790	12	32478244	C	G	0.0110749	0.00181041	9.5142e-10	NA	NA	NA
gSEM	rs11170468	12	39430048	A	C	0.0193773	0.00214047	1.39319e-19	NA	NA	NA
gSEM	rs2453488	12	49255208	T	C	0.014206	0.00194189	2.5633e-13	NA	NA	NA
moba_bmi_l_8y	rs7132908	12	50263148	A	G	0.0711305	0.00855257	9.03233e-17	rs7138803	0.872415	7.115e-20
moba_bmi_f_1y	rs10747592	12	51182122	T	C	0.0380484	0.00620832	8.86482e-10	NA	NA	NA
gSEM	rs2271189	12	56494991	G	A	0.00972213	0.00178338	4.99456e-08	NA	NA	NA
moba_bmi_d_6m	rs10877032	12	58270791	G	A	0.032681	0.00554713	3.82675e-09	NA	NA	NA
moba_bmi_d_6m	rs145775785	12	65902265	T	C	0.128048	0.0204771	4.02041e-10	NA	NA	NA
gSEM	rs7304380	12	77880740	C	T	0.0103305	0.00186493	3.03597e-08	NA	NA	NA
gSEM	rs1653559	12	90766691	A	G	0.0123005	0.00196619	3.94927e-10	NA	NA	NA
gSEM	rs76439972	12	92456577	C	T	0.0206243	0.00334761	7.23303e-10	NA	NA	NA
gSEM	rs7952745	12	98531463	T	G	0.0142167	0.00184571	1.3335e-14	NA	NA	NA
gSEM	rs1552759	12	99640557	T	C	0.0133298	0.00196655	1.21611e-11	NA	NA	NA
gSEM	rs12817542	12	103736499	T	C	0.0254808	0.00384719	3.51441e-11	NA	NA	NA
gSEM	rs6539267	12	106785554	C	T	0.0111097	0.00198052	2.02894e-08	NA	NA	NA
gSEM	rs3764002	12	108618630	T	C	0.0156643	0.00196606	1.6216e-15	NA	NA	NA
gSEM	rs11065785	12	111412908	T	C	0.010301	0.00179851	1.0191e-08	NA	NA	NA
gSEM	rs74237689	12	114340066	G	C	0.021148	0.00349949	1.5113e-09	NA	NA	NA
gSEM	rs61928401	12	116145231	A	G	0.0116901	0.00197792	3.41435e-09	NA	NA	NA
gSEM	rs4766818	12	117392105	G	A	0.0147242	0.00262044	1.92102e-08	NA	NA	NA
moba_bmi_d_6m	rs7305424	12	118399491	T	A	0.030497	0.00556954	4.35833e-08	NA	NA	NA
gSEM	rs2393717	12	121220375	C	G	0.0119041	0.00175206	1.0881e-11	NA	NA	NA
gSEM	rs28629903	12	122497001	T	C	0.0132048	0.00187654	1.96686e-12	NA	NA	NA
moba_bmi_d_6m	rs7307053	12	124494540	T	C	0.0377204	0.00578616	7.07457e-11	NA	NA	NA
moba_bmi_d_6m	rs2272368	12	124811855	A	G	0.0501464	0.00771368	7.97995e-11	NA	NA	NA
moba_bmi_d_6m	rs4396355	12	133058288	G	T	0.0498141	0.00885298	1.83565e-08	NA	NA	NA
gSEM	rs2243582	13	21305153	G	A	0.0119096	0.00192251	5.83506e-10	NA	NA	NA
gSEM	rs9507895	13	28018237	G	C	0.0191475	0.00204188	6.76116e-21	NA	NA	NA
gSEM	rs1933437	13	28624294	G	A	0.0224044	0.0019486	1.35515e-30	NA	NA	NA
gSEM	rs12872889	13	28674628	C	T	0.0140283	0.00213278	4.78613e-11	NA	NA	NA
gSEM	rs7998440	13	33125206	G	A	0.0110446	0.00186287	3.05197e-09	NA	NA	NA
gSEM	rs1336486	13	40784814	G	T	0.0173931	0.00205146	2.28348e-17	NA	NA	NA
gSEM	rs12429545	13	54102206	A	G	0.0299287	0.00280763	1.57008e-26	rs4477562	0.995351	8.288e-13
gSEM	rs9538146	13	59199461	G	A	0.0148957	0.00192309	9.50507e-15	NA	NA	NA
gSEM	rs434135	13	62866393	T	C	0.0137623	0.00188649	2.98318e-13	NA	NA	NA
gSEM	rs1333010	13	66205228	G	A	0.01966	0.00190132	4.63483e-25	NA	NA	NA
gSEM	rs9318238	13	74538020	T	C	0.0135252	0.00204009	3.36427e-11	NA	NA	NA
gSEM	rs1441264	13	79580919	A	G	0.0172902	0.0019215	2.29247e-19	NA	NA	NA
gSEM	rs7322872	13	100548329	C	T	0.0161032	0.00218857	1.86871e-13	NA	NA	NA
gSEM	rs9559023	13	108013711	T	C	0.0140457	0.00238729	4.01615e-09	NA	NA	NA
gSEM	rs17456958	14	25939932	G	A	0.0135098	0.00207976	8.25741e-11	NA	NA	NA
gSEM	rs11628454	14	26298037	C	G	0.0119123	0.00200126	2.64239e-09	NA	NA	NA
moba_bmi_e_8m	rs61974201	14	27954477	T	C	0.040435	0.00599473	1.52933e-11	NA	NA	NA
gSEM	rs17114658	14	29707949	A	T	0.0126112	0.00193222	6.71957e-11	NA	NA	NA
gSEM	rs225882	14	30480123	T	C	0.0187436	0.00207954	1.99826e-19	NA	NA	NA
gSEM	rs61978656	14	30491999	T	C	0.0565069	0.00482091	9.92596e-32	NA	NA	NA
gSEM	rs12883788	14	33303540	T	C	0.0137908	0.00189747	3.64861e-13	NA	NA	NA
gSEM	rs7159440	14	33819655	G	A	0.0123238	0.00194931	2.57956e-10	NA	NA	NA
gSEM	rs872281	14	40834177	C	T	0.0143773	0.00235553	1.0368e-09	NA	NA	NA
gSEM	rs61572255	14	48030450	C	G	0.0109491	0.00185841	3.82345e-09	NA	NA	NA
gSEM	rs10134101	14	50857632	A	G	0.0257661	0.00469405	4.03997e-08	NA	NA	NA
moba_bmi_d_6m	rs75876534	14	60075360	C	G	0.0531471	0.00899419	3.44088e-09	NA	NA	NA
gSEM	rs757572	14	73132029	T	C	0.0124295	0.00185517	2.08525e-11	NA	NA	NA
gSEM	rs8007058	14	73360258	A	G	0.011879	0.00216056	3.83868e-08	NA	NA	NA
gSEM	rs2239615	14	75745551	T	A	0.0119082	0.00203465	4.83599e-09	NA	NA	NA
moba_bmi_f_1y	rs176778	14	77885663	G	A	0.0316571	0.00579578	4.70576e-08	NA	NA	NA
gSEM	rs12891481	14	78426863	T	C	0.0143761	0.00174833	1.98799e-16	NA	NA	NA
gSEM	rs7159565	14	79891894	C	T	0.0149079	0.00195803	2.66373e-14	NA	NA	NA
gSEM	rs76565625	14	80318018	T	C	0.0284002	0.004525	3.46774e-10	NA	NA	NA
gSEM	rs10133279	14	82702712	T	C	0.0151099	0.00186745	5.90908e-16	NA	NA	NA
gSEM	rs8017719	14	84860549	A	G	0.0100824	0.00184221	4.42565e-08	NA	NA	NA
gSEM	rs1743218	14	91440289	T	G	0.0109973	0.00189387	6.36775e-09	NA	NA	NA
gSEM	rs4900184	14	93900609	C	T	0.0169482	0.00178701	2.44414e-21	NA	NA	NA
moba_bmi_e_8m	rs77783553	14	100574191	C	T	0.119	0.0187391	2.14813e-10	NA	NA	NA
moba_bmi_e_8m	rs57566934	14	101135876	C	T	0.0606648	0.0106521	1.23302e-08	NA	NA	NA
gSEM	rs78420139	14	101201687	G	A	0.0326436	0.00391354	7.35482e-17	NA	NA	NA
gSEM	rs35947256	14	101460366	T	G	0.0140187	0.00206462	1.12145e-11	NA	NA	NA
gSEM	rs74832004	14	101511771	C	A	0.0455351	0.00715224	1.93317e-10	NA	NA	NA
gSEM	rs4906266	14	103280067	C	A	0.0131531	0.00196488	2.1699e-11	NA	NA	NA
gSEM	rs824203	15	24009503	A	C	0.0116178	0.00184966	3.36299e-10	NA	NA	NA
gSEM	rs72693650	15	25097157	A	G	0.0160486	0.00237215	1.32943e-11	NA	NA	NA
gSEM	rs1898884	15	40641447	T	C	0.0150368	0.00224149	1.968e-11	NA	NA	NA
gSEM	rs76495904	15	41272057	A	G	0.0195875	0.00314008	4.43515e-10	NA	NA	NA
gSEM	rs34153025	15	41339697	T	C	0.0455206	0.00606953	6.38903e-14	NA	NA	NA
gSEM	rs12909651	15	46571621	A	G	0.011951	0.00181449	4.50615e-11	NA	NA	NA
gSEM	rs12899958	15	47926845	T	C	0.0152745	0.00189015	6.41675e-16	NA	NA	NA
moba_bmi_d_6m	rs6493361	15	49615952	G	C	0.0429119	0.00571415	5.92379e-14	NA	NA	NA
gSEM	rs10163018	15	53525415	C	T	0.0112057	0.00187817	2.4268e-09	NA	NA	NA
gSEM	rs72748948	15	63672925	T	C	0.0225057	0.0034733	9.19561e-11	NA	NA	NA
gSEM	rs4776742	15	66427055	A	G	0.0121693	0.00205954	3.44771e-09	NA	NA	NA
gSEM	rs8030456	15	68076856	C	T	0.0353073	0.0022416	6.76677e-56	NA	NA	NA
gSEM	rs753074	15	72101087	C	T	0.0194391	0.00294217	3.92004e-11	NA	NA	NA
gSEM	rs5742915	15	74336633	T	C	0.0117275	0.00175817	2.55299e-11	NA	NA	NA
gSEM	rs28478398	15	79368629	G	A	0.0119777	0.00201612	2.83352e-09	NA	NA	NA
gSEM	rs8023761	15	83647740	G	A	0.0131749	0.00198532	3.21959e-11	NA	NA	NA
moba_bmi_g_16m	rs10520573	15	84591575	A	G	0.0393965	0.00667921	3.67096e-09	NA	NA	NA
gSEM	rs12102007	15	90012094	C	A	0.0146601	0.00224793	6.95607e-11	NA	NA	NA
gSEM	rs6496619	15	90612683	A	G	0.015342	0.00214377	8.27219e-13	NA	NA	NA
gSEM	rs4932494	15	91975773	T	G	0.0124253	0.00184677	1.7188e-11	NA	NA	NA
gSEM	rs11856160	15	93452846	G	A	0.0169604	0.00237546	9.34321e-13	NA	NA	NA
gSEM	rs2871866	15	99221888	T	C	0.0123593	0.00210618	4.40802e-09	NA	NA	NA
moba_bmi_e_8m	rs1670262	15	99597353	A	G	0.0447357	0.0063522	1.88756e-12	NA	NA	NA
gSEM	rs8061554	16	3626458	T	C	0.0167861	0.00209744	1.21298e-15	NA	NA	NA
gSEM	rs879620	16	4015729	T	C	0.0238769	0.00198067	1.82714e-33	NA	NA	NA
gSEM	rs34972832	16	11198938	G	A	0.0135514	0.00234268	7.26975e-09	NA	NA	NA
gSEM	rs3803573	16	15138413	C	T	0.0128667	0.00192194	2.1624e-11	NA	NA	NA
gSEM	rs148965598	16	19975731	A	G	0.0480217	0.00279556	3.88892e-66	NA	NA	NA
gSEM	rs1379575	16	20052123	A	G	0.0289879	0.00222172	6.56349e-39	NA	NA	NA
gSEM	rs4238585	16	20255097	T	C	0.0261375	0.00276396	3.18286e-21	NA	NA	NA
gSEM	rs4780885	16	20380004	G	C	0.0179459	0.00177221	4.22485e-24	NA	NA	NA
gSEM	rs9929613	16	24599316	A	G	0.0121455	0.00211445	9.24378e-09	NA	NA	NA
gSEM	rs58006672	16	24685641	G	A	0.0134932	0.00207153	7.3353e-11	NA	NA	NA
moba_bmi_l_8y	rs35626515	16	28649651	A	C	0.0506279	0.00855214	3.22107e-09	NA	NA	NA
gSEM	rs6565175	16	30144379	C	G	0.0185246	0.0017956	5.92651e-25	NA	NA	NA
gSEM	rs2855475	16	31147548	A	G	0.0126519	0.00187924	1.66817e-11	NA	NA	NA
gSEM	rs13332755	16	49047944	T	G	0.0134834	0.00199822	1.50182e-11	NA	NA	NA
gSEM	rs77791228	16	50161297	G	A	0.0143217	0.00252551	1.42116e-08	NA	NA	NA
gSEM	rs34600710	16	51443975	T	C	0.0151169	0.00222195	1.02143e-11	NA	NA	NA
moba_bmi_l_8y	rs9972653	16	53814363	T	G	0.0803884	0.00857534	6.95985e-21	rs17817449	0.986098	1.69e-17
gSEM	rs1397128	16	61919410	T	C	0.0110745	0.00185836	2.53309e-09	NA	NA	NA
gSEM	rs385488	16	65940600	C	T	0.0115551	0.00188424	8.65088e-10	NA	NA	NA
moba_bmi_d_6m	rs150390634	16	66723392	A	G	0.157055	0.0260687	1.69477e-09	NA	NA	NA
moba_bmi_e_8m	rs76555405	16	67251378	T	C	0.105814	0.0151912	3.27341e-12	NA	NA	NA
moba_bmi_g_16m	rs889399	16	69556583	C	G	0.0387481	0.00671797	8.03008e-09	NA	NA	NA
gSEM	rs147190113	16	72360282	G	C	0.0435367	0.00780218	2.40415e-08	NA	NA	NA
gSEM	rs328380	16	73884655	C	T	0.0104472	0.00181167	8.08808e-09	NA	NA	NA
moba_bmi_e_8m	rs62062567	16	75445238	T	G	0.0327214	0.00579939	1.67884e-08	NA	NA	NA
moba_bmi_e_8m	rs13339044	16	77687685	C	A	0.117967	0.0213709	3.3907e-08	NA	NA	NA
gSEM	rs182558	16	81416699	C	A	0.018447	0.00317275	6.09271e-09	NA	NA	NA
moba_bmi_d_6m	rs17777059	16	81528953	G	A	0.0388335	0.00634578	9.38275e-10	NA	NA	NA
gSEM	rs11642090	16	81730582	C	T	0.0133637	0.0020045	2.61314e-11	NA	NA	NA
gSEM	rs11641362	16	85335951	G	T	0.0124248	0.00198776	4.08753e-10	NA	NA	NA
moba_bmi_h_2y	rs35414122	16	89742979	G	A	0.0580761	0.0102745	1.58187e-08	NA	NA	NA
moba_bmi_d_6m	rs9893527	17	2164210	C	A	0.0358873	0.00554356	9.56313e-11	NA	NA	NA
moba_bmi_b_6w	rs5418	17	7185092	A	G	0.039403	0.00670494	4.18504e-09	NA	NA	NA
moba_bmi_e_8m	rs116600817	17	7458795	A	G	0.048322	0.00649416	1.00046e-13	NA	NA	NA
moba_bmi_d_6m	rs9894621	17	12000584	A	G	0.0373668	0.00541305	5.08862e-12	NA	NA	NA
gSEM	rs11080094	17	27539029	A	C	0.0117977	0.00195949	1.73516e-09	NA	NA	NA
gSEM	rs3815156	17	29685150	G	A	0.0147074	0.00242013	1.22359e-09	NA	NA	NA
gSEM	rs79718433	17	31389475	G	A	0.0122203	0.00220549	3.01011e-08	NA	NA	NA
gSEM	rs57640529	17	32295633	T	C	0.0112801	0.00194861	7.08819e-09	NA	NA	NA
gSEM	rs12601380	17	34904985	A	C	0.0124349	0.00188056	3.78357e-11	NA	NA	NA
gSEM	rs7213767	17	35054784	A	G	0.0116655	0.00199364	4.87537e-09	NA	NA	NA
gSEM	rs9914265	17	35238488	T	C	0.010274	0.00186898	3.86042e-08	NA	NA	NA
gSEM	rs4793085	17	42320732	A	C	0.0110521	0.00188489	4.53143e-09	NA	NA	NA
moba_bmi_d_6m	rs10491140	17	43950976	G	T	0.0519438	0.00704711	1.69434e-13	NA	NA	NA
moba_bmi_d_6m	rs58879558	17	44095467	T	C	0.0553317	0.00688009	8.81658e-16	NA	NA	NA
moba_bmi_e_8m	rs2051821	17	46143515	T	C	0.0402242	0.00703255	1.06701e-08	NA	NA	NA
gSEM	rs9299	17	46669430	T	C	0.0151709	0.00194125	5.49587e-15	NA	NA	NA
gSEM	rs12952581	17	47448346	A	G	0.0187481	0.00191671	1.35345e-22	NA	NA	NA
gSEM	rs2072445	17	47587712	T	G	0.0232181	0.00311344	8.82596e-14	NA	NA	NA
gSEM	rs1994234	17	53229345	A	G	0.0155092	0.00175795	1.1214e-18	NA	NA	NA
gSEM	rs7217460	17	65393344	G	A	0.0152716	0.0021906	3.13735e-12	NA	NA	NA
moba_bmi_d_6m	rs4969072	17	71135799	G	A	0.0306449	0.00554462	3.25852e-08	NA	NA	NA
gSEM	rs4789145	17	73135344	T	C	0.010315	0.00187874	4.01009e-08	NA	NA	NA
gSEM	rs11150745	17	78757626	A	G	0.0183575	0.00201257	7.41437e-20	NA	NA	NA
gSEM	rs6565588	17	79492103	G	A	0.0130754	0.00180149	3.92493e-13	NA	NA	NA
gSEM	rs1013737	18	937050	C	G	0.0158632	0.00187471	2.63578e-17	NA	NA	NA
gSEM	rs4798573	18	7585129	C	G	0.0170235	0.00254199	2.12855e-11	NA	NA	NA
gSEM	rs1652344	18	21128857	T	C	0.0135961	0.00184867	1.91588e-13	NA	NA	NA
gSEM	rs6508344	18	22646735	A	G	0.0106473	0.00185354	9.22918e-09	NA	NA	NA
moba_bmi_d_6m	rs7407453	18	23313349	T	A	0.0330977	0.00553896	2.29483e-09	NA	NA	NA
gSEM	rs80355964	18	29938607	C	T	0.0453761	0.00613888	1.45084e-13	NA	NA	NA
gSEM	rs74566047	18	30631797	C	T	0.0232632	0.00399436	5.74555e-09	NA	NA	NA
moba_bmi_c_3m	rs12454103	18	35271023	C	A	0.0409387	0.0072558	1.67884e-08	NA	NA	NA
gSEM	rs559231	18	39644247	T	G	0.0135164	0.00189681	1.0344e-12	NA	NA	NA
gSEM	rs67937375	18	40729163	G	A	0.0120709	0.00188457	1.50257e-10	NA	NA	NA
gSEM	rs7235304	18	45896150	A	C	0.0123822	0.00220822	2.05477e-08	NA	NA	NA
gSEM	rs11661531	18	45916229	A	C	0.0163681	0.00224813	3.32001e-13	NA	NA	NA
gSEM	rs68015088	18	51484010	G	A	0.0118358	0.00196641	1.75548e-09	NA	NA	NA
gSEM	rs12457718	18	52499626	C	T	0.0202857	0.00218295	1.50328e-20	NA	NA	NA
gSEM	rs9957320	18	56876430	G	T	0.0169596	0.00241628	2.23666e-12	NA	NA	NA
moba_bmi_l_8y	rs476828	18	57852587	C	T	0.0804366	0.00963521	6.93107e-17	rs571312	0.978022	1.996e-10
moba_bmi_l_8y	rs77226405	18	58077260	C	A	0.17349	0.0238332	3.35429e-13	NA	NA	NA
gSEM	rs582204	18	66093490	T	C	0.0137216	0.00201052	8.79979e-12	NA	NA	NA
gSEM	rs470198	18	74656403	T	A	0.0133626	0.00182711	2.60248e-13	NA	NA	NA
gSEM	rs8091180	18	77164243	G	A	0.0106847	0.00189768	1.79799e-08	NA	NA	NA
gSEM	rs2613801	19	5126268	T	C	0.0113592	0.00179277	2.35565e-10	NA	NA	NA
gSEM	rs273496	19	18241857	T	C	0.0122778	0.0017914	7.19473e-12	NA	NA	NA
gSEM	rs45543339	19	18503194	T	C	0.0161529	0.00217415	1.08976e-13	NA	NA	NA
gSEM	rs11881338	19	18838014	T	A	0.015839	0.00176009	2.27765e-19	NA	NA	NA
gSEM	rs4808940	19	19410948	C	G	0.0146473	0.00196213	8.32932e-14	NA	NA	NA
gSEM	rs4805555	19	30853948	G	A	0.0167688	0.00214851	5.95673e-15	NA	NA	NA
moba_bmi_g_16m	rs55865721	19	33832399	G	A	0.0795635	0.0144318	3.52614e-08	NA	NA	NA
moba_bmi_d_6m	rs3786915	19	33987424	G	T	0.0326354	0.00577813	1.62233e-08	NA	NA	NA
gSEM	rs29940	19	34310034	A	G	0.0145946	0.00188849	1.09112e-14	NA	NA	NA
gSEM	rs8103658	19	46166360	T	A	0.0105587	0.0019192	3.76287e-08	NA	NA	NA
gSEM	rs11672660	19	46180184	C	T	0.0142036	0.00239676	3.10053e-09	NA	NA	NA
gSEM	rs11671304	19	47564643	T	C	0.0266913	0.00193007	1.69931e-43	NA	NA	NA
gSEM	rs34671296	19	47567519	G	A	0.0611103	0.00692498	1.0983e-18	NA	NA	NA
gSEM	rs601338	19	49206674	G	A	0.0156952	0.00181626	5.54742e-18	NA	NA	NA
gSEM	rs4801809	19	50334895	T	C	0.0200598	0.00308888	8.34789e-11	NA	NA	NA
moba_bmi_f_1y	rs156349	20	1838222	C	A	0.0347966	0.0059582	5.21639e-09	NA	NA	NA
gSEM	rs6081121	20	1889858	G	A	0.0103547	0.00187253	3.20638e-08	NA	NA	NA
gSEM	rs6050911	20	2634167	C	A	0.0126052	0.00206654	1.06307e-09	NA	NA	NA
gSEM	rs6107853	20	6609877	A	G	0.0148403	0.00197409	5.58271e-14	NA	NA	NA
gSEM	rs6039356	20	8999221	G	T	0.0118096	0.00199068	2.98496e-09	NA	NA	NA
gSEM	rs6108251	20	9048430	A	G	0.0129571	0.00227414	1.21525e-08	NA	NA	NA
gSEM	rs16996644	20	15813475	G	C	0.0288296	0.00280965	1.05681e-24	NA	NA	NA
gSEM	rs947088	20	17171373	T	G	0.0227193	0.00196583	6.79569e-31	NA	NA	NA
moba_bmi_e_8m	rs8117463	20	17231063	G	A	0.038265	0.0060514	2.55971e-10	NA	NA	NA
gSEM	rs78575685	20	18321965	G	A	0.0276746	0.00337618	2.46441e-16	NA	NA	NA
gSEM	rs3828002	20	19702049	G	A	0.0134969	0.00173655	7.71054e-15	NA	NA	NA
gSEM	rs11697013	20	21502317	A	G	0.0183556	0.00262677	2.79077e-12	NA	NA	NA
moba_bmi_e_8m	rs853849	20	31439355	A	G	0.037698	0.00579097	7.52662e-11	NA	NA	NA
moba_bmi_d_6m	rs6058077	20	33140999	A	G	0.0422803	0.00728128	6.37133e-09	NA	NA	NA
gSEM	rs2281148	20	36433288	C	T	0.0152974	0.00213339	7.47465e-13	NA	NA	NA
gSEM	rs2425859	20	44921857	T	C	0.00987762	0.00177914	2.82589e-08	NA	NA	NA
gSEM	rs6124969	20	45816277	T	C	0.0105946	0.00190644	2.7401e-08	NA	NA	NA
gSEM	rs2224272	20	54158005	T	G	0.0145071	0.00222454	6.96585e-11	NA	NA	NA
gSEM	rs7271435	20	54429806	G	A	0.0178592	0.00221278	6.97654e-16	NA	NA	NA
gSEM	rs6024742	20	54846660	C	A	0.0119174	0.00201623	3.40585e-09	NA	NA	NA
moba_bmi_c_3m	rs1998200	20	57309234	A	G	0.0333973	0.00555112	1.78443e-09	NA	NA	NA
gSEM	rs117455294	20	57427951	C	A	0.0290468	0.00418836	4.05878e-12	NA	NA	NA
moba_bmi_d_6m	rs2777939	20	62243810	T	C	0.045698	0.0083292	4.10025e-08	NA	NA	NA
gSEM	rs2832496	21	31310759	A	T	0.0111044	0.00202818	4.3735e-08	NA	NA	NA
gSEM	rs78523440	21	35233866	A	G	0.0185981	0.00336032	3.11929e-08	NA	NA	NA
gSEM	rs762146	21	39238132	T	C	0.0139597	0.00205189	1.02217e-11	NA	NA	NA
gSEM	rs13047416	21	40309436	C	G	0.0162145	0.00200759	6.65917e-16	NA	NA	NA
gSEM	rs240064	22	22281638	C	T	0.0175415	0.00175753	1.84978e-23	NA	NA	NA
gSEM	rs7290417	22	23362423	A	G	0.0154717	0.00277517	2.47473e-08	NA	NA	NA
moba_bmi_e_8m	rs134666	22	29495254	G	A	0.0369927	0.0062732	3.70305e-09	NA	NA	NA
gSEM	rs3819663	22	33965639	G	A	0.0104629	0.00188477	2.83565e-08	NA	NA	NA
gSEM	rs5755950	22	36183988	T	C	0.0170556	0.00311067	4.18335e-08	NA	NA	NA
gSEM	rs2072858	22	40708679	T	C	0.0190134	0.00199342	1.4555e-21	NA	NA	NA
moba_bmi_d_6m	rs7287939	22	41396353	T	C	0.0529453	0.00940529	1.8093e-08	NA	NA	NA
gSEM	rs2157295	22	42701984	G	T	0.0127681	0.00188851	1.37087e-11	NA	NA	NA

[truncated: 14 more sheets: 10 MOBA+gSEM traj., 11 ALSPAC Traj_PGS, 12 MR, 13 PoE MoBa, 14 PoE UKB, 15 G2G genes, 16 Genes+Traj., 17 Pathways by Traj., 18 Clust. pathways, 19 Child-adult effects, 20 Hypomap cells, 21 Hypomap genes, 22 SAC10 WGS, 23 WES Lookups]
